# Supplementary material for: Is self-esteem associated with self-rated health among French college students? A longitudinal epidemiological study: the i-Share cohort
Source: PubMed Central journal article supplement — BMJ Open. 2019 Jun 4;9(6):e024500. doi: 10.1136/bmjopen-2018-024500 (PMC6561426; doi:10.1136/bmjopen-2018-024500), 2019-06-04
Supplement: bmjopen-2018-024500.draft_revisions.pdf [file bmjopen-2018-024500.draft_revisions.pdf]

# BMJ Open

BMJ Open is committed to open peer review. As part of this commitment we make the peer review history of every article we publish publicly available.

When an article is published we post the peer reviewers' comments and the authors' responses online. We also post the versions of the paper that were used during peer review. These are the versions that the peer review comments apply to.

The versions of the paper that follow are the versions that were submitted during the peer review process. They are not the versions of record or the final published versions. They should not be cited or distributed as the published version of this manuscript.

BMJ Open is an open access journal and the full, final, typeset and author-corrected version of record of the manuscript is available on our site with no access controls, subscription charges or pay-per-view fees (<http://bmjopen.bmj.com>).

If you have any questions on BMJ Open's open peer review process please email [info.bmjopen@bmj.com](mailto:info.bmjopen@bmj.com)

# BMJ Open

## Association between self-esteem and self-rated health among college students, the i-Share cohort

|                               |                                                                                                                                                                                                                                                                                                                                                                                                                                                                                                                                                                                                                                                                                    |
|-------------------------------|------------------------------------------------------------------------------------------------------------------------------------------------------------------------------------------------------------------------------------------------------------------------------------------------------------------------------------------------------------------------------------------------------------------------------------------------------------------------------------------------------------------------------------------------------------------------------------------------------------------------------------------------------------------------------------|
| Journal:                      | <i>BMJ Open</i>                                                                                                                                                                                                                                                                                                                                                                                                                                                                                                                                                                                                                                                                    |
| Manuscript ID                 | bmjopen-2018-024500                                                                                                                                                                                                                                                                                                                                                                                                                                                                                                                                                                                                                                                                |
| Article Type:                 | Research                                                                                                                                                                                                                                                                                                                                                                                                                                                                                                                                                                                                                                                                           |
| Date Submitted by the Author: | 04-Jun-2018                                                                                                                                                                                                                                                                                                                                                                                                                                                                                                                                                                                                                                                                        |
| Complete List of Authors:     | Arsandaux, Julie; Univ. Bordeaux, Inserm, Bordeaux Population Health Research Center, team HEALTHY, UMR 1219, F-33000<br>Michel, Grégory; Univ. Bordeaux, Inserm, Bordeaux Population Health Research Center, team HEALTHY, UMR 1219, F-33000<br>Tournier, Marie; Univ. Bordeaux, Inserm, Bordeaux Population Health Research Center, team HEALTHY, UMR 1219, F-33000 ; Centre Hospitalier Perrens<br>Tzourio, Christophe; Univ. Bordeaux, Inserm, Bordeaux Population Health Research Center, team HEALTHY, UMR 1219, F-33000<br>Galéra, Cédric; Univ. Bordeaux, Inserm, Bordeaux Population Health Research Center, team HEALTHY, UMR 1219, F-33000 ; Centre Hospitalier Perrens |
| Keywords:                     | self-esteem, self-rated health, psychological determinants, students, cohort study                                                                                                                                                                                                                                                                                                                                                                                                                                                                                                                                                                                                 |
|                               |                                                                                                                                                                                                                                                                                                                                                                                                                                                                                                                                                                                                                                                                                    |

SCHOLARONE™  
Manuscripts

1  
2  
3  
4  
5  
6  
7  
8  
9  
10  
11  
12  
13  
14  
15  
16  
17  
18  
19  
20  
21  
22  
23  
24  
25  
26  
27  
28  
29  
30  
31  
32  
33  
34  
35  
36  
37  
38  
39  
40  
41  
42  
43  
44  
45  
46  
47  
48  
49  
50  
51  
52  
53  
54  
55  
56  
57  
58  
59  
60

# Association between self-esteem and self-rated health among college students, the i-Share cohort

Julie Arsandaux, Msc, Ph.D Candidate\*<sup>a</sup>, Grégory Michel, Ph.D<sup>a</sup>, Marie Tournier, M.D,  
Ph.D<sup>a,b</sup>, Christophe Tzourio, M.D, Ph.D <sup>a</sup> and Cédric Galéra, M.D, Ph.D <sup>a,b</sup>

<sup>a</sup> Univ. Bordeaux, Inserm, Bordeaux Population Health Research Center, team HEALTHY,  
UMR 1219, F-33000 Bordeaux, France.

<sup>b</sup> Centre Hospitalier Perrens, Bordeaux, France.

**Corresponding Author:** Julie Arsandaux

Postal address:

Université de Bordeaux, ISPED

146, rue Léo Saignat – CS61292

33076 Bordeaux cedex, FRANCE

Tel: +33 (0) 689626100 or Tél: + 33 (0) 5 57 57 16 59/ Fax: + 33 (0) 5 47 30 42 09

E-mail: julie.arsandaux@u-bordeaux.fr

Word count (exc. figures/tables): 3441

## ABBREVIATIONS

95%CI: 95% Confidential Interval

BMI: Body Mass Index

IQR: Interquartile range

MICE: Multivariate Imputation by Chained Equations

OR: Odds Ratio

p: p-value

For peer review only

## ABSTRACT

**Objectives:** The aim of the study was to estimate the association between self-esteem and subsequent self-rated health during college years taking into account a wide range of potential confounders.

**Methods:** This study is based on the French cohort i-Share, a prospective population-based cohort study of students in higher education institutions in France. Eligibility criteria were to be officially enrolled at a university or higher education institute, to be at least 18 years of age, to be able to read and understand French and to provide informed consent for participation. We conducted multivariate modeling to evaluate the association between self-esteem levels and prospective assessment of self-rated health. Data regarding self-rated health, global self-esteem, and demographic, educational, social, behavioral, environmental and financial characteristics were collected through an internet-based questionnaire.

**Results:** The 1011 participants had a median age of 21.9 years and 79% (795/1011) were females. Self-rated health was assessed a median of 8 months after the self-esteem measurement. Twenty percent of the students declared average to very poor health (203/1011). Students with higher levels of self-esteem were more likely to declare good or very good self-rated health (adjusted odds ratio=1.40, 95% confidence interval [1.15-1.72], p-value=0.001). Other factors associated with good or very good self-rated health were low body mass index, a comfortable financial situation during childhood and three personality traits (low persistence and harm avoidance and high cooperativeness).

**Conclusions:** This study offers novel findings on the impact of self-esteem on self-rated health among college students. Interventions targeting self-esteem should be experimented during university years in order to improve health outcomes.

**Keywords:** self-esteem; self-rated health; psychological determinants; students; cohort study

## ARTICLE SUMMARY

### Strengths and limitations of this study

- The present study is based on a prospective design among a large number of participants
- A broad adjustment for confounders have been used to estimate unbiased association
- This study investigates self-rated health among college students, a population that has received less attention in the literature
- Participants were volunteers in the i-Share project which could have arisen a sampling bias. Extrapolation to other student populations may be limited.
- Reverse causation between self-esteem and self-rated health may exist and could not be investigated with our design.

### AUTHORS CONTRIBUTIONS

J. Arsandaux and C. Galera developed the study concept and the study design. C. Tzourio is the principal investigator of the i-Share Cohort. M. Tournier and G. Michel participated actively in the creation of mental health questionnaire and bring psychological and psychiatric expertise to the interpretation of the results. J. Arsandaux performed the data analysis and interpretation under the supervision of C. Galera. J. Arsandaux drafted the manuscript, and all co-authors provided critical revisions. All authors approved the final version of the manuscript for submission.

## INTRODUCTION

Self-rated health is considered to be a relevant indicator of general health. The high validity, reliability and predictive power of self-rated health make it one of the best predictors of objective health problems (including mortality) and health care utilization (1–3). Collection of self-rated health is recommended as a standard and cost-effective measure in health surveys (4–7). These associations persisted even after objective health adjustment, suggesting that self-rated health may represent a more inclusive and universal predictor than clinical examination, medical records or self-reports of medical conditions (8).

Determinants of self-rated health problems have attracted interdisciplinary interest. Several studies have investigated demographic, educational, social, behavioral, environmental and financial determinants (9). In addition, a few studies have emphasized the associations between psychosocial resources and self-rated health assessment (10,11). However, there are important pitfalls in the literature which should be underlined.

First, the population of college students has received little attention in this specific domain. Yet this period corresponding to the transition between adolescence and adulthood is crucial for the development of individuals, as well as for constructing and reinforcing self-esteem. Although the student population is in relatively good health, it is noteworthy that mental health and substance use issues are prevalent during the college years (12–14). On the one hand, self-rated health can serve to evaluate a general health status predicting future health problems before they set in. On the other hand, college is a period of development in which interventions could modify the onset of determinants such as psychosocial resources.

Second, despite recent research, psychosocial resources are insufficiently investigated in the literature (11). Among individual characteristics, the impact of self-esteem (i.e. the overall aggregated opinion of oneself at any one time, as defined by Rosenberg) on the rating of one's health remains poorly understood. To our knowledge, only two studies have estimated the association between self-esteem

1  
2  
3 and self-rated health, and none among college students (15,16). These studies have reported a  
4  
5 significant relation supporting the hypothesis that high self-esteem is associated with better self-rated  
6  
7 health. In addition, several studies have evidenced associations between self-esteem and several  
8  
9 important outcomes related with health: academic success, well-being and internalized/externalized  
10  
11 mental health problems (17,18). It should be noted that self-esteem is a potentially modifiable factor.  
12  
13 Efficient interventions aiming at improving psychosocial abilities and self-knowledge are available  
14  
15 (19,20).  
16

17  
18 A final limitation is the lack of studies that comprehensively adjust for various risk factors (i.e. the six  
19  
20 domains reported above). This implies possible confounding biases that need to be addressed in order  
21  
22 to identify a significant target for early public health interventions, such as self-esteem (9).  
23

24  
25 The aim of the present study was to estimate the association between self-esteem and subsequent self-  
26  
27 rated health during college years, taking into account a wide range of potential confounders in the i-  
28  
29 Share cohort. The i-Share cohort, one of the largest epidemiological studies conducted on European  
30  
31 students, constitutes an opportunity to investigate this research question thanks to its large longitudinal  
32  
33 collection of multidimensional data on childhood context, lifestyle, health information, living  
34  
35 conditions and mental and psychosocial examinations.  
36  
37  
38  
39  
40

## 41 **METHODS**

### 42 ***Study population***

43  
44  
45 This study is based on the Internet-based Students Health Research Enterprise (i-Share, www.i-  
46  
47 share.fr) project, a prospective population-based cohort study of students in higher education  
48  
49 institutions in France. The objectives of i-Share cohort are to evaluate important health aspects among  
50  
51 university students over the course of 10 years. Eligibility criteria are to be officially enrolled at a  
52  
53 university or higher education institute, to be at least 18 years of age, to be able to read and understand  
54  
55 French and to provide informed consent for participation. Recruitment started in February 2013.  
56  
57  
58  
59  
60



1  
2  
3 Students were informed about the objectives of the study through promotion campaigns. Specifically,  
4 a group of trained students informed their peers about the study and initiate the online recruitment  
5 process. The baseline inquiry collected information on students' health, personal and family medical  
6 histories, socio-demographic characteristics, and lifestyle habits. Next, students received an e-mail  
7 invitation to complete follow-up questionnaires and sub-study data collection. Since December 2015,  
8 an optional mental health survey has been implemented to provide data on several dimensions of  
9 mental and psychological health. To date, the i-Share cohort is still ongoing. For this specific study,  
10 we used data available as of April 29th, 2016. We used a longitudinal design to compare self-esteem  
11 data collected during the mental health sub-study (Time 2) with the next planned assessment of self-  
12 rated health (i.e. during the 1<sup>st</sup> follow-up of the cohort, Time 3). We used baseline characteristics  
13 collected at cohort inclusion for adjustment (Time 1). Only college students aged between 18 and 30  
14 years old, participating in the mental health sub-study before their 1<sup>st</sup> follow-up were included. The i-  
15 Share project on which this study was based was approved by the Commission Nationale de  
16 l'Informatique et des Libertés (CNIL) [DR-2013-019].

### 33 ***Participant involvement***

34  
35 No participant were involved in setting the research question or the outcome measures, nor  
36 were they involved in developing plans for design of the study. No participants were asked to advise  
37 on interpretation or writing up of results. However, there are plans to disseminate the results of the  
38 research to study participants by the use of the i-share website and social networks and by means of a  
39 newsletter send to participant quarterly via email. Furthermore, a group of trained students participated  
40 during the recruitment process (i.e. informed their peers about the study and initiate the online  
41 recruitment process). These students have been also involved during communication campaign,  
42 advising the study team about priority messages and communication tools.

### 53 ***Measures and scales***

54  
55 *Outcome: Self-rated health*  
56  
57  
58  
59  
60

1  
2  
3 Students gauged their current general self-rated health by the question: “*Do you consider your current*  
4 *health?*” with a five-point response scale ranging from 1 to 5 (1=“*Very poor*” / 2=“*Poor*” /  
5 3=“*Average*” / 4=“*Good*” / 5=“*Very good*”). The variable was dichotomized as follows: “*Very good /*  
6 *Good*” versus “*Average / Poor / Very poor*”. Psychometric performance of this assessment has been  
7 reported in two papers (5,6). Self-rated health was measured at the participant’s inclusion and during  
8 follow-up questionnaires. The 1<sup>st</sup> follow-up self-rated health measure corresponded to the primary  
9 outcome of this study (Time 3).  
10  
11  
12  
13  
14  
15  
16  
17

### 18 *Main variable of interest: Self-esteem*

19  
20  
21 Self-esteem was assessed using the Self-esteem scale (Rosenberg, 1965), a 10-item self-report  
22 measure of global self-esteem. Each item is answered on a 4-point Likert type scale ranging from  
23 1=“*Strongly disagree*” to 4=“*Strongly agree*”. The score can range from 10 (low level of self-esteem)  
24 to 40 (high level of self-esteem). The Rosenberg Self-esteem Scale is the most widely used instrument  
25 for the measurement of global self-esteem (21). It was translated into French, and its high reliability  
26 and validity were confirmed with a French sample (22). Self-esteem measurement was part of the  
27 optional mental health survey (Time 2). We used a continuous score for the primary analysis.  
28  
29  
30  
31  
32  
33  
34  
35  
36

### 37 *Covariates*

38  
39 All the covariates were collected through the self-administered online questionnaire at cohort  
40 enrolment (Time 1), except for psychosocial covariates which are part of the mental health sub-study  
41 (i.e. same time as self-esteem measurement, Time 2). Covariates included in this study covered the 6  
42 domains of potential determinants of self-rated health described in the literature (9):  
43  
44  
45  
46  
47

48 *Demographic covariates:* We built the following demographic variables: *sex* (male/female), *age* (in  
49 years when the outcome was measured, Time 3) and *Body Mass Index (BMI)* (<25 vs ≥25 kg/m<sup>2</sup>).  
50  
51

52 *Academic covariates:* *Education level of student* was collected at cohort inclusion and categorized  
53 into: freshman, sophomore, junior and senior. For *parental education level*, we used the declared  
54  
55  
56  
57  
58  
59  
60

1  
2  
3 education level of parents by students (at least one of their parents had a higher education level than  
4  
5 baccalaureate versus not).

6  
7  
8 *Financial covariates: Self-rated economic situation during childhood (“Very*  
9  
10 *difficult”/“Difficult”/“Correct” versus “Comfortable”/“Very comfortable”)* and *self-rated*  
11 *satisfaction about financial resources during college (“Very satisfied”/“Rather satisfied” versus*  
12 *“Satisfied”/“Rather dissatisfied”/“Totally unsatisfied”).*

13  
14  
15  
16  
17 *Social covariates: Students living conditions (cohabitation with parents, flatsharing/couple or alone)*  
18 *and self-rated familial support during childhood (Weak “None at all”/ “A little”/“Moderate” versus*  
19 *High “A lot”/“Enormous”).*

20  
21  
22  
23  
24 *Geographical covariates: Students included in this study were spread over the French territory. To*  
25 *take into account disparities across college campuses we selected the 4 most constitutive cities of the*  
26 *registration university in the sample (Bordeaux/Versailles/Nice/Paris/other).*

27  
28  
29  
30  
31 *Behavioral covariates: Tobacco consumption (none, ≤10 cigarettes/day, >10 cigarettes/day). Binge*  
32 *drinking frequency was defined as drinking at least 6 drinks on the same occasion (evening) (Never,*  
33 *Rarely if “Once a year”, Occasionally if “several times a year”/“once a month”, Frequently if “once a*  
34 *week or less”/“2 to 3 times a week”/“4 to 6 times a week”). Then students declared whether at least*  
35 *once in life they consumed psychoactive substances from cannabis, ecstasy, amphetamines, nitrous*  
36 *oxide, inhalation products and cocaine. To determine physical activity frequency, we combined*  
37 *walking times and sports by summing the count number of duration in minutes per day (<25, between*  
38 *25 to 35, >35). Finally, good nutritional habits was based on adherence to The French National*  
39 *Nutrition and Health Program (PNNS) (23). Each of the seven nutrition recommendation was coded 0*  
40 *if not followed and 1 if followed. The sum (7 representing the highest adherence to recommendations*  
41 *and 0 the lowest) was computed.*

42  
43  
44  
45  
46  
47  
48 *Psychosocial covariates: Coping was measured by the Student Coping Scale (24). Three sub-scores*  
49 *are computed representing social support coping, emotional coping and festive coping (higher score*  
50  
51  
52  
53  
54  
55  
56  
57  
58  
59  
60

1  
2  
3 represented higher coping resources). *Aggressiveness* was measured by an adaptation of the Brown-  
4 Goodwin assessment for Life History of Aggression, translated into French by Bellivier (25). Higher  
5 scores represented higher aggressiveness. *Impulsivity* was measured by an Adolescent Version of the  
6 Barratt Impulsiveness Scale-11 (BIS-11-A) translated into French by Coudrey F. and Michel G (26).  
7 Higher score represent higher impulsivity. *Personality traits* were measured by the Temperament and  
8 Character Inventory translated into French by Pélissolo F (27,28). Six sub-scores were computed:  
9 novelty seeking, persistence, harm avoidance, determination, reward dependence and cooperativeness.  
10 Higher scores represented higher adherence to the type of personality.

11  
12  
13  
14  
15  
16  
17  
18  
19  
20  
21 *Objective health indicator:* participants with at least one medical diagnosis for mental or physical  
22 diseases or disability at cohort inclusion.

### 23 24 25 ***Study size***

26  
27 We performed a sample size calculation for logistic regression between self-esteem and self-rated  
28 health, alpha 0.05 and power 0.90. Based on two French studies among college students, we assumed  
29 that the distribution of self-esteem was normal (mean=28.9, standard deviation=5.7) (29,30). The  
30 proportion of participants who declare having good or very good health has been estimated in 2 studies  
31 in Sweden and Italy among college students to be 13 and 23% respectively (31,32). We assumed the  
32 odds ratio (OR) to be 1.1 based on the only two studies reported among high school students in South  
33 Korea and adults in Canada (15,16). The minimum sample size required was between 232 and 344  
34 depending on self-rated health proportions (SAS software PROC POWER).

### 35 36 37 38 39 40 41 42 43 44 45 ***Statistical analysis***

46  
47 First we described the study sample. Then, in order to estimate the association between self-esteem  
48 and self-rated health, we computed a logistic regression model. We modeled the probability of  
49 declaring good or very good self-rated health during the 1st follow-up. The primary explanatory  
50 variable was self-esteem. To allow relevant interpretation, we estimate associations for the increase of  
51 one standard deviation (i.e. 5.696). All the potential confounders described above were entered in the  
52  
53  
54  
55  
56  
57  
58  
59  
60

1  
2  
3 model as covariates. In the modeling process, we first estimated univariate models. Log-linearity of  
4 the effect of self-esteem (continuous variable) was checked. We tested interactions for gender, age and  
5 cities among self-rated health and self-esteem links by univariate models and performed stratified  
6 analysis if the interaction was significant ( $p < 0.05$ ). Then we selected variables if  $p\text{-value} < 0.25$  to  
7 compute multivariate models. Finally, we performed a stepwise backward selection for a final  
8 multivariate model with a threshold of  $p\text{-value} = 0.05$ . At every step, we checked the confusion effect  
9 and computed the OR, 95% confidential interval (95%CI) and  $p\text{-value}$  ( $p$ ) of the corresponding Wald  
10 test.  
11

12  
13 Finally we conducted sensitivity analyses to test the robustness of the findings: (1) modeling self-rated  
14 health (a) in continuous variable (ranging from 1 to 5) and (b) in three categories (with an “average”  
15 modality); (2) estimating the self-esteem effect throughout a categorized variable (corresponding to  
16 quartiles:  $\leq 25$ , ]25-28], ]28-33],  $> 33$ ) to bring to light a potential dose-response effect; (3)  
17 completing the adjustment (a) with baseline self-rated health; (b) forcing the adjustment with delays  
18 between the three measurement periods; (c) with objective health indicator; (4) performing primary  
19 modeling among the complete case population.  
20

21  
22 Our missing data analysis procedures used missing at random (MAR) assumptions. We used the  
23 MICE (multivariate imputation by chained equations) method of multiple multivariate imputation in  
24 SAS software (PROC MI and MIANALYZE) (33,34). We independently analyzed 10 copies of the  
25 data, each with missing values suitably imputed, in the multivariate logistic regression analyses. We  
26 averaged estimates of the variables to give a single mean estimate and adjusted standard errors  
27 according to Rubin’s rules. We imputed only data from covariates using self-esteem, self-rated health,  
28 covariates data and completed imputation process with other data collected in the i-share cohort  
29 (alcohol consumption, walking time per day, time of sport practice, stress score, anxiety score,  
30 depression score and self-rated quality of sleep).  
31

32  
33 We performed all analyses using the SAS statistical software (SAS version 9.3; SAS Institute Inc,  
34 Cary, NC).  
35

## RESULTS

The total sample comprised 1011 participants. Figure 1 shows the flow chart of the study population. Of the 14795 college students enrolled in the i-Share cohort, 3613 completed the mental health sub-study, 1038 were eligible for this study and 1011 were ultimately analyzed. Prospective self-rated health assessment (i.e. during the 1st follow-up, Time 3) occurred between 1 and 3 years after inclusion in the cohort (Median=13.2 months) and between 1 month and 3 years after completion of the mental health sub-study (i.e. self-esteem measure, Time 2) (Median=8.4 months). Baseline characteristics of the study population are presented in Table 1. The median age of participants was 21.9 (Interquartile range (IQR)=20.2-23.7) years, 795/1011 (79%) were female, 367/1011 (37%) were freshmen and most students were in Bordeaux (686/1011, 68%). 346/1011 (34%) participants had at least one missing data item among covariates. BMI and living situation were the most frequently missing variables (15% and 12% respectively) and other missing variables accounted for less than 5% of missing data. At inclusion, 18% of the students declared average or poor health (183/1011). At 1st follow-up, 20% of the students declared average or poor health (203/1011).

Self-esteem among students who declared average or poor health at 1st follow-up was lower than students who declared good or very good health (mean=26.2, 95%CI [25.4-27.0] versus mean=28.1, 95%CI [28.8-29.5],  $p<0.0001$ ). Table 2 presents the whole modeling process after imputation of missing data. The unadjusted self-esteem effect (for the increase of one standard deviation) on self-rated health was statistically significant (OR=1.70, 95%CI [1.44-1.99],  $p<0.0001$ ). Log-linearity of the self-esteem effect was confirmed, allowing a valid estimation. All predefined interactions (gender, cities and age) were not statistically significant (all  $p$ -values  $>0.10$ ). The final multivariate model was adjusted for BMI, financial situation during childhood and 3 personality traits (persistence, harm avoidance and cooperativeness). With this final model, the increase of one standard deviation of self-esteem was associated with a 40% increase in the probability of declaring good or very good health versus average to very poor health (adjusted OR=1.40, 95%CI [1.15-1.72],  $p=0.001$ ).

1  
2  
3 BMI>25 kg/m<sup>2</sup>, difficult financial situation during childhood decreased by 2 the probability of  
4 declaring good to very good health. Three personality traits were associated with self-rated health: low  
5 persistence and harm avoidance and high cooperativeness were associated with declaring good to very  
6 good health. The restraint model showed acceptable discrimination power (Area Under Curve=0.7205)  
7 and the Hosmer-Lemeshow test proved model suitability to data (p-value=0.8614).  
8  
9  
10  
11  
12  
13

14 Table 3 presents sensitivity analysis results showing the robustness of findings. Whatever the  
15 modeling choices for self-rated health and self-esteem or adjusting strategies, higher self-esteem was  
16 persistently associated with better self-rated health. Furthermore, the model with self-esteem in four  
17 categories showed a dose-response effect with graduate adjusted OR and a significant global test  
18 (p<0.04).  
19  
20  
21  
22  
23  
24

## 25 **DISCUSSION**

### 26 **Findings of study**

27  
28  
29  
30  
31 In this large longitudinal study among college students, higher self-esteem levels were independently  
32 associated with better self-rated health, even after complete adjustment for known confounders. This  
33 association was not modified by gender or age. Additional risk factors such as BMI, financial situation  
34 during childhood and personality traits (persistence, harm avoidance and cooperativeness) were  
35 associated with self-rated health. This original finding opens up an opportunity for interventional  
36 research targeting psychosocial resources, especially self-esteem, in the university setting.  
37  
38  
39  
40  
41  
42  
43

### 44 **Interpretation**

45  
46  
47 The association between higher levels of self-esteem and better self-rated health found in the current  
48 study corroborates previous research. This finding based on a sample of college students, supports and  
49 extends previous studies on other population samples by showing the same pattern of association  
50 between self-esteem and self-rated health (15,16). Several research works and literature reviews  
51 formulate hypotheses on the potential underlying mechanisms which could explain the relationship  
52 between self-esteem and health. Good self-esteem may enable individuals to make better choices,  
53  
54  
55  
56  
57  
58  
59  
60

1  
2  
3 including adopting healthy behaviors (18). High self-esteem may increase the ability to put in place  
4 appropriate strategies to cope with everyday situations, which in turn increases the capacity to feel  
5 well and more generally the capacity of resilience (35). An alternative hypothesis is based on bodily  
6 sensations (i.e. information that conveys messages from the organism to the brain). This information is  
7 available to the individual consciousness, is included in self-rating of health and may reflect important  
8 physiological dysregulations, such as inflammatory processes (36). In this hypothesis, self-esteem  
9 appears to be a psychosocial ability that allows individuals to better cope with stress and prevents or  
10 diminishes these deleterious inflammatory processes. Throughout the literature, several determinants  
11 of self-rated health have been found (9). Consistently, we found in our study that a low BMI, a  
12 comfortable financial situation during childhood and three personality traits were associated with good  
13 self-rated health. In contrast to the literature, we have not found gender differences for self-rated  
14 health after complete adjustment (37–39). This discordant result could be due to differences in  
15 sampling and adjustment strategies. In particular, fewer males than women participated in the i-Share  
16 cohort. Moreover, we found that self-rated health was influenced more by the family's financial  
17 difficulties during childhood than during college years.

### 34 35 **Strengths and limitations**

36  
37  
38 The strengths of our study include the large number of participants, the longitudinal design, the  
39 standardized assessment tools and the broad adjustment for confounders. In addition, this study  
40 investigates self-rated health among college students, a population that has received less attention in  
41 the literature. A set of limitations should however be considered to properly interpret the findings.  
42 First, a sampling bias could have arisen since participants were volunteers in the i-Share project and  
43 we selected participants who have data on the first follow-up, extrapolation to other student  
44 populations may be limited. Second, we used a longitudinal design with a median follow-up period of  
45 8 months, which is relevant to assess impact on self-rated health in young adults. But we do not have  
46 any information on persistency of the self-esteem/self-rated health relationship in the longer term,  
47 especially after the academic years. Moreover, reverse causation between self-esteem and self-rated  
48  
49  
50  
51  
52  
53  
54  
55  
56  
57  
58  
59  
60



1  
2  
3 health may exist and could not be investigated with our design. However, in sensitivity analyses, when  
4 self-rated health measurement prior to self-esteem was entered in the model as a covariate, the result  
5 remained similar. Further research should use repeated self-esteem and self-rated health measurements  
6 to better explore the bidirectionality assumption.  
7  
8  
9  
10

## 11 **Implications**

12  
13  
14 From a public health perspective this study provides a contributive insight for interventional research.  
15 It suggests that interventions targeting self-esteem during college years should be experimented. Yet  
16 the type of intervention is still to be determined since most of the previous interventional research on  
17 self-esteem has concerned children (19,20). Consequently, further studies are needed to investigate  
18 whether these interventions could be extended or transferred to college students. Additionally,  
19 information about multidimensional self-esteem could support the choice of an intervention in the  
20 broad spectrum existing among children. Self-esteem improvement interventions could focus either on  
21 (1) global self-esteem by increasing self-knowledge and resilience through an individual intervention,  
22 web-based for instance, or (2) a specific dimension such as social self-esteem by using exercise or  
23 mentoring program (19,20). Further, the university years represent a relevant period for implementing  
24 early interventions, before health behaviors and mental health problems set in. College setting offers a  
25 positive climate for learning, a structured organization, the availability of mentoring and physical  
26 activity programs.  
27  
28  
29  
30  
31  
32  
33  
34  
35  
36  
37  
38  
39  
40  
41  
42

43 From a research perspective, we have identified two priority areas. First, it appears necessary to better  
44 understand the pathways between self-esteem and self-rated health conducting mediational analyses.  
45 Second, the self-reported nature of the 2 measures (i.e. self-esteem and self-rated health) might explain  
46 why they are linked (36). Considering that self-esteem has been reported to be linked with health  
47 outcomes other than self-rated health, we believe that associations with both the evaluation framework  
48 and health are coexisting.  
49  
50  
51  
52  
53  
54  
55  
56  
57  
58  
59  
60

## ACKNOWLEDGEMENTS

The authors are indebted to the participants of the i-Share project for their commitment and cooperation and to the entire i-Share staff for their expert contribution and assistance.

## FUNDING

The i-Share research project has received funding from the French National Research Agency (Agence Nationale de la Recherche, ANR) via the program 'Investissements d'Avenir' reference ANR-10-COHO-05. This study was further supported by a grant from the Excellence Cluster 'Health Determinants in Societies' HEADS of the University of Bordeaux, managed by the ANR, under the 'Future Investments' program in the framework of the Bordeaux 'Initiatives d'excellence' (IdEx) program, grant number (ANR-10-IDEX-03-02).

## CONFLICTS OF INTEREST

None declared

## REFERENCES

1. Jonnalagadda SS, Diwan S. Health behaviors, chronic disease prevalence and self-rated health of older Asian Indian immigrants in the U.S. *J Immigr Health*. avr 2005;7(2):75-83.
2. Nielsen TH. The Relationship Between Self-Rated Health and Hospital Records. *Health Econ*. avr 2016;25(4):497-512.

- 1  
2  
3 3. Sajjad A, Freak-Poli RL, Hofman A, Roza SJ, Ikram MA, Tiemeier H. Subjective measures of  
4 health and all-cause mortality - the Rotterdam Study. *Psychol Med.* août 2017;47(11):1971 -  
5  
6  
7 80.  
8
- 9  
10 4. Ware J. The assessment of health status. In: *Applications of social science to clinical medicine*  
11 and health policy. New Brunswick, NJ: Rutgers University Press; p. 204-28.  
12  
13
- 14 5. de Bruin A, And Others. Health Interview Surveys: Towards International Harmonization of  
15 Methods and Instruments. WHO Regional Publications, European Series, No. 58 [Internet].  
16 Office of Publications, WHO Regional Office for Europe, Scherfigsvej 8, DK-2100  
17 Copenhagen 0, Denmark (39 Swiss francs).; 1996 [cité 1 août 2017]. Disponible sur:  
18  
19 <https://eric.ed.gov/?id=ED394961>  
20  
21  
22
- 23 6. Robine J-M, Jagger C. Creating a coherent set of indicators to monitor health across Europe:  
24 the Euro-REVES 2 project. *Eur J Public Health.* 1 sept 2003;13(suppl\_3):6-14.  
25  
26  
27
- 28 7. DeSalvo KB, Bloser N, Reynolds K, He J, Muntner P. Mortality Prediction with a Single  
29 General Self-Rated Health Question. *Journal of General Internal Medicine.* 1 mars  
30  
31  
32  
33 2006;21(3):267-75.  
34
- 35 8. Mossey JM, Shapiro E. Self-rated health: a predictor of mortality among the elderly. *Am J*  
36  
37  
38  
39 *Public Health.* août 1982;72(8):800-8.  
40
- 41 9. Mantzavinis GD, Pappas N, Dimoliatis IDK, Ioannidis JPA. Multivariate models of self-  
42 reported health often neglected essential candidate determinants and methodological issues. *J*  
43  
44  
45  
46  
47  
48  
49  
50  
51  
52  
53  
54  
55  
56  
57  
58  
59  
60  
*Clin Epidemiol.* mai 2005;58(5):436-43.
10. Bobak M, Pikhart H, Rose R, Hertzman C, Marmot M. Socioeconomic factors, material  
inequalities, and perceived control in self-rated health: cross-sectional data from seven post-  
communist countries. *Soc Sci Med.* nov 2000;51(9):1343-50.
11. Mackenbach JP, Simon JG, Looman CWN, Joung IMA. Self-assessed health and mortality:  
could psychosocial factors explain the association? *Int J Epidemiol.* déc 2002;31(6):1162-8.

- 1  
2  
3 12. Degenhardt L, Coffey C, Carlin JB, Swift W, Moore E, Patton GC. Outcomes of occasional  
4  
5 cannabis use in adolescence: 10-year follow-up study in Victoria, Australia. *Br J Psychiatry*.  
6  
7 avr 2010;196(4):290-5.  
8
- 9  
10 13. Mota N, Alvarez-Gil R, Corral M, Rodríguez Holguín S, Parada M, Crego A, et al. Risky  
11  
12 alcohol use and heavy episodic drinking among Spanish University students: a two-year  
13  
14 follow-up. *Gac Sanit*. oct 2010;24(5):372-7.  
15
- 16  
17 14. Van De Ven MOM, Greenwood PA, Engels RCME, Olsson CA, Patton GC. Patterns of  
18  
19 adolescent smoking and later nicotine dependence in young adults: a 10-year prospective  
20  
21 study. *Public Health*. févr 2010;124(2):65-70.  
22
- 23  
24 15. Shields M, Shoostari S. Determinants of self-perceived health. *Health Rep*. déc  
25  
26 2001;13(1):35-52.  
27
- 28  
29 16. Chun J, Nam S, Chung I-J, Kang H, Nho CR, Woo S. Factors associated with perceived health  
30  
31 among Korean adolescents. *Soc Work Public Health*. 2014;29(6):528-39.  
32
- 33  
34 17. Baumeister RF, Campbell JD, Krueger JI, Vohs KD. Does High Self-Esteem Cause Better  
35  
36 Performance, Interpersonal Success, Happiness, or Healthier Lifestyles? *Psychol Sci Public*  
37  
38 Interest. mai 2003;4(1):1-44.  
39
- 40  
41 18. Mann M, Hosman CMH, Schaalma HP, de Vries NK. Self-esteem in a broad-spectrum  
42  
43 approach for mental health promotion. *Health Educ Res*. août 2004;19(4):357-72.  
44
- 45  
46 19. King KA, Vidourek RA, Davis B, McClellan W. Increasing self-esteem and school  
47  
48 connectedness through a multidimensional mentoring program. *J Sch Health*. sept  
49  
50 2002;72(7):294-9.  
51
- 52  
53 20. Ekeland E, Heian F, Hagen KB, Abbott J, Nordheim L. Exercise to improve self-esteem in  
54  
55 children and young people. *Cochrane Database Syst Rev*. 2004;(1):CD003683.  
56
- 57  
58 21. Blascovich J, Tomaka J. Measures of Self-Esteem. In: *Measures of Personality and Social*  
59  
60 *Psychological Attitudes: Measures of Social Psychological Attitudes*. Academic Press; 2013.  
p. 115-23.

- 1  
2  
3 22. Chambon O, Cornillon-Jacoudon D, Germain M, Assouline B, Landazuri F, Marie-Cardine  
4 M. Bien-être subjectif et qualité de vie. Définitions, mesures et facteurs déterminants.  
5 Implications thérapeutiques. *Inf Psychiatr.* 1992;(Suppl 5: LVII-LXII).  
6  
7  
8  
9 23. Hercberg S, Chat-Yung S, Chauliac M. The French National Nutrition and Health Program:  
10 2001–2006–2010. *Int J Public Health.* 1 avr 2008;53(2):68-77.  
11  
12  
13 24. Boujut E, Bruchon-Schweitzer M, Dombrowski SU. Coping among Students: Development  
14 and validation of an exploratory measure. *Psychology.* août 2012;3(8):562-8.  
15  
16  
17 25. Brown GL, Goodwin FK, Ballenger JC, Goyer PF, Major LF. Aggression in humans  
18 correlates with cerebrospinal fluid amine metabolites. *Psychiatry Res.* oct 1979;1(2):131-9.  
19  
20  
21 26. Fossati A, Barratt ES, Acquarini E, Di Ceglie A. Psychometric Properties of an Adolescent  
22 Version of the Barratt Impulsiveness Scale-11 for a Sample of Italian High School Students.  
23 Percept Mot Skills. 1 oct 2002;95(2):621-35.  
24  
25  
26 27. Cloninger CR, Bayon C, Svrakic DM. Measurement of temperament and character in mood  
27 disorders: a model of fundamental states as personality types. *Journal of Affective Disorders.*  
28 1 oct 1998;51(1):21-32.  
29  
30  
31 28. Pelissolo A, Mallet L, Baleyte J-M, Michel G, Cloninger CR, Allilaire J-F, et al. The  
32 Temperament and Character Inventory-Revised (TCI-R): psychometric characteristics of the  
33 French version. *Acta Psychiatrica Scandinavica.* 1 août 2005;112(2):126-33.  
34  
35  
36 29. Estingoy P, Fort E, Normand J-C, Lerond J, D'Amato T. Vulnérabilités psychiques chez les  
37 étudiants : à propos de deux enquêtes en santé mentale à l'université Lyon 1. *Annales Médico-  
38 psychologiques, revue psychiatrique.* 1 juill 2013;171(6):392-8.  
39  
40  
41 30. Saleh D, Camart N, Romo L. Predictors of Stress in College Students. *Front Psychol*  
42 [Internet]. 2017 [cité 1 août 2017];8. Disponible sur:  
43 <http://journal.frontiersin.org/article/10.3389/fpsyg.2017.00019/full>  
44  
45  
46  
47  
48  
49  
50  
51  
52  
53  
54  
55  
56  
57  
58  
59  
60

- 1  
2  
3 31. Von Bothmer MIK, Fridlund B. Self-rated health among university students in relation to  
4 sense of coherence and other personality traits. *Scandinavian Journal of Caring Sciences*. 1  
5 déc 2003;17(4):347-57.  
6  
7  
8  
9 32. Waure C de, Soffiani V, Virdis A, Poscia A, Pietro MLD. Italian university students' self-  
10 perceived health and satisfaction of life. *Annali dell'Istituto Superiore di Sanità*. juin  
11 2015;51(2):121-5.  
12  
13  
14  
15 33. Rubin DB, Schenker N. Multiple imputation in health-care databases: An overview and some  
16 applications. *Statist Med*. 1 avr 1991;10(4):585-98.  
17  
18  
19 34. Schafer JL. *Analysis of Incomplete Multivariate Data*. CRC Press; 1997. 448 p.  
20  
21 35. Harter S. *The construction of the self: A developmental perspective*. New York, NY, US:  
22 Guilford Press; 1999. (Distinguished contributions in psychology).  
23  
24  
25 36. Jylhä M. What is self-rated health and why does it predict mortality? Towards a unified  
26 conceptual model. *Soc Sci Med*. août 2009;69(3):307-16.  
27  
28  
29 37. Schmidt M. Predictors of self-rated health and lifestyle behaviours in Swedish university  
30 students. *Glob J Health Sci*. 15 mai 2012;4(4):1-14.  
31  
32  
33 38. Cullati S, Rousseaux E, Gabadinho A, Courvoisier DS, Burton-Jeangros C. Factors of change  
34 and cumulative factors in self-rated health trajectories: a systematic review. *Adv Life Course*  
35 *Res*. mars 2014;19:14-27.  
36  
37  
38 39. El Ansari W, Stock C. Explaining the gender difference in self-rated health among university  
39 students in Egypt. *Women Health*. oct 2016;56(7):731-44.  
40  
41  
42  
43  
44  
45  
46  
47  
48  
49  
50  
51  
52  
53  
54  
55  
56  
57  
58  
59  
60

1  
2  
3 **Tables**  
4

5 **Table 1.** Characteristics of the study population concerning outcome (i.e. self-rated health), main  
6 exposure variable (i.e. self-esteem) and demographic data at Time 1: cohort enrolment, Time 2:  
7 optional mental health survey, Time 3: cohort follow-up in the i-Share Cohort, France, 2013-2016.  
8  
9  
10  
11 n=1011  
12  
13

| Characteristics                                  | Participants<br>n=1011 |             |
|--------------------------------------------------|------------------------|-------------|
| <b>Outcome at Time 3</b>                         |                        |             |
| SRH 5-items, n (%)                               |                        |             |
| Very good                                        | 225                    | (22.3)      |
| Good                                             | 583                    | (57.7)      |
| Average                                          | 177                    | (17.5)      |
| Poor                                             | 26                     | (2.6)       |
| Very poor                                        | 0                      | (-)         |
| SRH dichotomized, n (%)                          |                        |             |
| Very good to good                                | 808                    | (79.9)      |
| Average to very poor                             | 203                    | (20.1)      |
| SRH in continuous <sup>a</sup> , median (IQR)    | 2.0                    | (2.0 ; 2.0) |
| <b>Main exposure at Time 2</b>                   |                        |             |
| Self-esteem in continuous variable, median (IQR) | 28                     | (25 ; 33)   |
| Self-esteem in categorical variable, n (%)       |                        |             |
| ≤25                                              | 287                    | (28.4)      |
| ]25-28]                                          | 219                    | (21.7)      |
| ]28-33]                                          | 277                    | (27.4)      |
| >=33                                             | 228                    | (22.6)      |
| <b>Demographic data</b>                          |                        |             |

|                                            |      |               |
|--------------------------------------------|------|---------------|
| Age at Time 3, median (IQR)                | 21.9 | (20.2 ; 23.7) |
| Female, n (%)                              | 795  | (78.6)        |
| BMI <25 Kg/m <sup>2</sup> at Time 1, n (%) | 909  | (89.9)        |

*n*: number of participants; *IQR*: Interquartile Range; *BMI*: Body Mass Index ; *SRH*: self-rated

*health*

<sup>a</sup> 1=Very good, 2=Good, 3=Average, 4=Poor, 5=Very poor

For peer review only



**Table 2.** Final logistic model of probability to declare good or very good compared to very poor, poor or average self-rated health after imputation of missing data on covariates. The i-Share Cohort, France, 2013-2016. n=1011

|                                      | Self-rated health <sup>a</sup> , n(%) or median<br>(IQR)                  |                          | Multivariate model |                |
|--------------------------------------|---------------------------------------------------------------------------|--------------------------|--------------------|----------------|
|                                      | Good / very good,<br>n=808                                                | Average / poor,<br>n=203 | aOR                | 95%CI          |
|                                      | Self-esteem (for the increase of one<br>standard deviation <sup>b</sup> ) | 29 (26-33)               | 26 (22-30)         | 1.40           |
| BMI at inclusion                     |                                                                           |                          |                    |                |
| <25 kg/m <sup>2</sup>                | 623 (89.6)                                                                | 130 (81.3)               | 1                  | -              |
| ≥25                                  | 72 (10.4)                                                                 | 30 (18.8)                | 0.50               | 0.31 ; 0.80*** |
| Financial situation during childhood |                                                                           |                          |                    |                |
| Comfortable to very comfortable      | 487 (60.3)                                                                | 86 (42.4)                | 1                  | -              |
| Correct to very difficult            | 321 (39.7)                                                                | 117 (57.6)               | 0.54               | 0.39 ; 0.74*** |
| Personality                          |                                                                           |                          |                    |                |
| Persistence                          | 29 (24-31)                                                                | 29 (25-33)               | 0.94               | 0.91 ; 0.97*** |
| Harm avoidance                       | 26 (22-30)                                                                | 29 (25-33)               | 0.95               | 0.92 ; 0.98*** |
| Cooperativeness                      | 32 (29-35)                                                                | 32 (28-35)               | 1.04               | 1.01 ; 1.08**  |

*n*: number of participants; *IQR*: Interquartile Range; *BMI*: Body Mass Index; *OR*: Odds Ratio;

*95%CI*: 95% Confidence Interval

<sup>a</sup> Self-rated health description provided before data-imputation

<sup>b</sup> Self-esteem standard deviation: 5.696

\*p-value<0.25; \*\*p-value<0.05; \*\*\*p-value<0.01

**Table 3.** Sensitivity analysis of the effect of self-esteem on self-rated health. The i-Share Cohort, France, 2013-2016. n=1011

|                                                                               | Estimation <sup>a</sup> of increase of one standard deviation <sup>b</sup><br>for (1), (3) and (4) and natural scale for (2) of self-esteem effect on self-rated health |
|-------------------------------------------------------------------------------|-------------------------------------------------------------------------------------------------------------------------------------------------------------------------|
| <b>(1) modeling self-rated health</b>                                         |                                                                                                                                                                         |
| (a) in continuous variable (ranging from 1 to 5) <sup>c</sup>                 | $\beta=-0.05$ p=0.0005                                                                                                                                                  |
| (b) in three categories (with a “average” modality)                           |                                                                                                                                                                         |
| Average versus Poor/very poor                                                 | OR=1.69 p =0.0429                                                                                                                                                       |
| Good/very good versus Poor/very poor                                          | OR=2.23 p =0.0015                                                                                                                                                       |
| <b>(2) estimating self-esteem effect throughout a categorized variable</b>    |                                                                                                                                                                         |
| ]25-28] vs $\leq 25$                                                          | OR=1.25 p=0.3032                                                                                                                                                        |
| ]28-33] vs $\leq 25$                                                          | OR=2.28 p=0.0009                                                                                                                                                        |
| >33 vs $\leq 25$                                                              | OR=1.85 p=0.0301                                                                                                                                                        |
| <b>(3) completing adjustment</b>                                              |                                                                                                                                                                         |
| (a) with baseline self-rated health                                           | OR=1.29 p=0.0160                                                                                                                                                        |
| (b) forcing the adjustment with delays between the three measurement periods  | OR=1.40 p=0.0009                                                                                                                                                        |
| (c) with objective health indicator                                           | OR=1.40 p=0.0011                                                                                                                                                        |
| <b>(4) performing primary modeling among complete case population (n=665)</b> | OR=1.55 p=0.0009                                                                                                                                                        |

OR: Odds Ratio; p: p-value

<sup>a</sup> Models adjusted for Body Mass Index, financial situation during childhood, personality scores (persistence, harm avoidance, cooperativeness)

<sup>b</sup> Self-esteem standard deviation: 5.696

<sup>c</sup> High score represent better self-rated health

## Figures

**Figure 1.** Flow diagram showing participant flow through the study based on the i-Share Cohort, France, 2013-2016.

## Supplementary material

**Table S1.** Characteristics of the study population concerning educational, financial, social, geographical, follow up, behavioral and psychological data at Time 1: cohort enrolment, Time 2: optional mental health survey, Time 3: cohort follow-up in the i-Share Cohort, France, 2013-2016. n=1011

**Table S2.** Univariate and multivariate logistic model of probability to declare good or very good compared to very poor, poor or average self-rated health after imputation of missing data on covariates. The i-Share Cohort, France, 2013-2016. n=1011

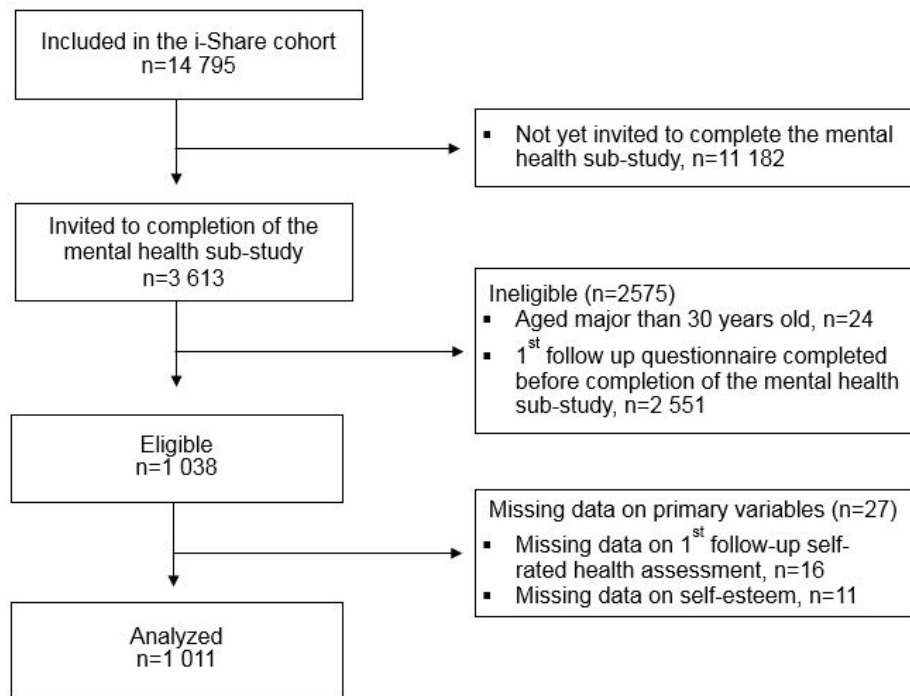

Figure 1. Flow diagram showing participant flow through the study based on the i-Share Cohort, France, 2013-2016.

187x134mm (96 x 96 DPI)

**Table S1.** Characteristics of the study population concerning educational, financial, social, geographical, follow up, behavioral and psychological data at Time 1: cohort enrolment, Time 2: optional mental health survey, Time 3: cohort follow-up in the i-Share Cohort, France, 2013-2016. n=1011

| Characteristics                                                                               | Participants<br>n=1011 |               |
|-----------------------------------------------------------------------------------------------|------------------------|---------------|
| <b>Educational data at Time 1, n (%)</b>                                                      |                        |               |
| University year                                                                               |                        |               |
| Freshman                                                                                      | 367                    | (36.5)        |
| Sophomore                                                                                     | 218                    | (21.7)        |
| Junior                                                                                        | 154                    | (15.3)        |
| Senior                                                                                        | 267                    | (26.5)        |
| At least one parent with high education level                                                 | 274                    | (28.5)        |
| <b>Financial data at Time 1, n (%)</b>                                                        |                        |               |
| Comfortable to very comfortable financial situation during childhood                          | 573                    | (56.7)        |
| Rather satisfied to very satisfied with financial resources                                   | 504                    | (49.8)        |
| <b>Social data at Time 1, n (%)</b>                                                           |                        |               |
| Cohabitation                                                                                  |                        |               |
| With parents                                                                                  | 278                    | (31.3)        |
| Flatssharing or couple                                                                        | 287                    | (32.4)        |
| No cohabitation / alone                                                                       | 322                    | (36.3)        |
| Strong familial support during childhood                                                      | 730                    | (72.9)        |
| <b>Geographical and follow-up data</b>                                                        |                        |               |
| City of the registration university at Time 1, n (%)                                          |                        |               |
| Bordeaux                                                                                      | 686                    | (67.9)        |
| Versailles                                                                                    | 77                     | (7.6)         |
| Nice                                                                                          | 22                     | (2.2)         |
| Paris                                                                                         | 45                     | (4.5)         |
| Other                                                                                         | 181                    | (17.9)        |
| Delay in months between inclusion and SRH assessment (follow-up), median (IQR)                | 13.2                   | (12.3 ; 23.4) |
| Delay in months between mental health assessment and SRH assessment (follow-up), median (IQR) | 8.4                    | (3.2 ; 12.0)  |
| <b>Behavioral data at Time 1</b>                                                              |                        |               |
| Tobacco consumption, n (%)                                                                    |                        |               |
| None                                                                                          | 761                    | (75.3)        |
| <=10 cigarettes                                                                               | 213                    | (21.1)        |
| >10 cigarettes                                                                                | 37                     | (3.66)        |
| Alcohol consumption frequency during evening, n (%) (MD=40/1)                                 |                        |               |
| Never                                                                                         | 22                     | (2.3)         |
| Rarely                                                                                        | 225                    | (23.2)        |
| Occasionally                                                                                  | 393                    | (40.5)        |
| Frequently                                                                                    | 330                    | (34.0)        |
| Psychoactive substance consumption at least once in life, n (%)                               | 603                    | (59.6)        |
| Accordance with nutritional French recommendations, median (IQR)                              | 3                      | (3 ; 4)       |
| Physical activity, n (%)                                                                      |                        |               |
| Less than 25 min/day                                                                          | 109                    | (10.9)        |
| Between 25 and 35 min/day                                                                     | 183                    | (18.3)        |
| More than 35 min/day                                                                          | 706                    | (70.7)        |
| <b>Psychological data at Time 2, median (IQR)</b>                                             |                        |               |
| Coping - Social support                                                                       | 11                     | (8 ; 14)      |
| Coping - Emotional                                                                            | 20                     | (17 ; 22)     |
| Coping - Festive-addictive                                                                    | 11                     | (9 ; 14)      |
| Impulsivity                                                                                   | 61                     | (56 ; 67)     |

|   |                                 |      |           |
|---|---------------------------------|------|-----------|
| 1 |                                 |      |           |
| 2 |                                 |      |           |
| 3 | Aggressiveness                  | 1    | (0 ; 3)   |
| 4 | Personality - Novelty seeking   | 20.5 | (18 ; 23) |
| 5 | Personality - Persistence       | 28   | (24 ; 31) |
| 6 | Personality - Harm avoidance    | 27   | (22 ; 31) |
| 7 | Personality - Determination     | 27   | (23 ; 31) |
| 8 | Personality - Reward dependence | 28   | (23 ; 32) |
| 9 | Personality - Cooperativeness   | 32   | (29 ; 35) |

*n*: number of participants; *IQR*: Interquartile Range; *BMI*: Body Mass Index ; *SRH*: self-rated health

For peer review only

**Table 1 supp mat.** Univariate and multivariate logistic model of probability to declare good or very good compared to very poor, poor or average self-rated health after imputation of missing data on covariates. The i-Share Cohort, France, 2013-2016. n=1011

|                                                                                               | Univariate model |                | Multivariate model |                |
|-----------------------------------------------------------------------------------------------|------------------|----------------|--------------------|----------------|
|                                                                                               | OR               | 95% CI         | aOR                | 95% CI         |
| <b>MAIN EXPOSURE</b>                                                                          |                  |                |                    |                |
| Self-esteem (for the increase of one standard deviation <sup>b</sup> )                        | 1.70             | 1.44 ; 1.99*** | 1.40               | 1.15 ; 1.72*** |
| <b>COVARIATES</b>                                                                             |                  |                |                    |                |
| <b>Demographic data</b>                                                                       |                  |                |                    |                |
| Gender                                                                                        |                  |                |                    |                |
| Male                                                                                          | 1                | -              |                    |                |
| Female                                                                                        | 0.48             | 0.31 ; 0.74*** |                    |                |
| Age at self-rated health assessment (follow-up)                                               | 0.98             | 0.92 ; 1.04    |                    |                |
| BMI at inclusion                                                                              |                  |                |                    |                |
| <25 kg/m <sup>2</sup>                                                                         | 1                | -              | 1                  | -              |
| ≥25                                                                                           | 0.52             | 0.33 ; 0.81*** | 0.50               | 0.31 ; 0.80*** |
| <b>Educational data</b>                                                                       |                  |                |                    |                |
| University year at inclusion                                                                  |                  | *              |                    |                |
| 1 <sup>st</sup> year / freshman                                                               | 1                | -              |                    |                |
| 2 <sup>nd</sup> year / sophomore                                                              | 1.54             | 1.00 ; 2.37    |                    |                |
| 3 <sup>rd</sup> year / junior                                                                 | 1.60             | 0.98 ; 2.62    |                    |                |
| 4 <sup>th</sup> year or more / senior                                                         | 1.22             | 0.83 ; 1.80    |                    |                |
| Parents' education level                                                                      |                  |                |                    |                |
| At least one with high level                                                                  | 1                | -              |                    |                |
| Both with low level or only one given with low level                                          | 0.86             | 0.60 ; 1.22    |                    |                |
| <b>Financial data</b>                                                                         |                  |                |                    |                |
| Financial situation during childhood                                                          |                  |                |                    |                |
| Comfortable to very comfortable                                                               | 1                | -              | 1                  | -              |
| Correct to very difficult                                                                     | 0.48             | 0.36 ; 0.66*** | 0.54               | 0.39 ; 0.74*** |
| Satisfaction with financial resources at inclusion                                            |                  |                |                    |                |
| Rather satisfied to very satisfied                                                            | 1                | -              |                    |                |
| Completely dissatisfied to satisfied                                                          | 0.55             | 0.40 ; 0.75*** |                    |                |
| <b>Social data</b>                                                                            |                  |                |                    |                |
| Cohabitation at inclusion                                                                     |                  |                |                    |                |
| No cohabitation                                                                               | 1                | -              |                    |                |
| With parents                                                                                  | 1.03             | 0.70 ; 1.51    |                    |                |
| Flat sharing or couple                                                                        | 1.12             | 0.76 ; 1.64    |                    |                |
| Familial support during childhood                                                             |                  |                |                    |                |
| Strong                                                                                        | 1                | -              |                    |                |
| Weak                                                                                          | 0.56             | 0.40 ; 0.78*** |                    |                |
| <b>Geographical and follow-up data</b>                                                        |                  |                |                    |                |
| City of the registration university                                                           |                  |                |                    |                |
| Bordeaux                                                                                      | 1                | -              |                    |                |
| Versailles                                                                                    | 1.16             | 0.63 ; 2.14    |                    |                |
| Nice                                                                                          | 1.16             | 0.39 ; 3.49    |                    |                |
| Paris                                                                                         | 1.04             | 0.49 ; 2.20    |                    |                |
| Other                                                                                         | 1.08             | 0.71 ; 1.63    |                    |                |
| Delay in months between inclusion and self-rated health assessment (follow-up)                | 1.00             | 0.97 ; 1.03    |                    |                |
| Delay in months between mental health assessment and self-rated health assessment (follow-up) | 1.00             | 0.98 ; 1.02    |                    |                |
| <b>Behavioral data</b>                                                                        |                  |                |                    |                |

|                                                           |      |                |      |                |
|-----------------------------------------------------------|------|----------------|------|----------------|
| Tobacco consumption at inclusion                          |      |                |      |                |
| None                                                      | 1    | -              |      |                |
| <=10 cigarettes                                           | 0.97 | 0.66 ; 1.42    |      |                |
| >10 cigarettes                                            | 0.66 | 0.31 ; 1.40    |      |                |
| Alcohol consumption frequency during evening at inclusion |      |                |      |                |
|                                                           |      | **             |      |                |
| Never drink                                               | 1    | -              |      |                |
| Never binge                                               | 1.09 | 0.41 ; 2.91    |      |                |
| Occasionally binge                                        | 1.53 | 0.58 ; 4.05    |      |                |
| Frequently binge                                          | 1.99 | 0.75 ; 5.33    |      |                |
| Psychoactive substance consumption                        |      |                |      |                |
| Never                                                     | 1    | -              |      |                |
| Once in life                                              | 1.26 | 0.92 ; 1.72*   |      |                |
| Accordance with nutritional French recommendations        | 0.97 | 0.85 ; 1.10    |      |                |
| Physical activity                                         |      |                |      |                |
| More than 35 min/day                                      | 1    | -              |      |                |
| Less than 25 min/day                                      | 0.89 | 0.54 ; 1.44    |      |                |
| Between 25 and 35 min/day                                 | 1.01 | 0.67 ; 1.52    |      |                |
| <b>Psychological data</b>                                 |      |                |      |                |
| Coping                                                    |      |                |      |                |
| Social support                                            | 1.03 | 0.99 ; 1.08*   |      |                |
| Emotional                                                 | 0.93 | 0.90 ; 0.97*** |      |                |
| Festive-addictive                                         | 1.04 | 1.00 ; 1.09*   |      |                |
| Impulsivity                                               | 0.99 | 0.97 ; 1.01*   |      |                |
| Agressiveness                                             | 0.95 | 0.90 ; 1.00**  |      |                |
| Personality                                               |      |                |      |                |
| Novelty seeking                                           | 1.02 | 1.00 ; 1.06*   |      |                |
| Persistence                                               | 0.95 | 0.92 ; 0.97*** | 0.94 | 0.91 ; 0.97*** |
| Harm avoidance                                            | 0.91 | 0.89 ; 0.94*** | 0.95 | 0.92 ; 0.98*** |
| Determination                                             | 1.07 | 1.04 ; 1.10*** |      |                |
| Reward dependence                                         | 1.03 | 1.01 ; 1.06**  |      |                |
| Cooperativeness                                           | 1.04 | 1.01 ; 1.08*** | 1.04 | 1.01 ; 1.08**  |

*n*: number of participants; *IQR*: Interquartile Range; *BMI*: Body Mass Index; *OR*: Odds Ratio; *95%CI*: 95% Confidence Interval

<sup>a</sup> Self-rated health description provided before data-imputation

<sup>b</sup> Self-esteem standard deviation: 5.696

\**p*-value<0.25; \*\**p*-value<0.05; \*\*\**p*-value<0.01



**STROBE 2007 (v4) checklist of items to be included in reports of observational studies in epidemiology\***  
**Checklist for cohort, case-control, and cross-sectional studies (combined)**

| Section/Topic             | Item # | Recommendation                                                                                                                                                                                                                                                                                                                                                                                                                                                         | Reported on page # |
|---------------------------|--------|------------------------------------------------------------------------------------------------------------------------------------------------------------------------------------------------------------------------------------------------------------------------------------------------------------------------------------------------------------------------------------------------------------------------------------------------------------------------|--------------------|
| Title and abstract        | 1      | (a) Indicate the study's design with a commonly used term in the title or the abstract                                                                                                                                                                                                                                                                                                                                                                                 | 1,3                |
|                           |        | (b) Provide in the abstract an informative and balanced summary of what was done and what was found                                                                                                                                                                                                                                                                                                                                                                    | 3                  |
| <b>Introduction</b>       |        |                                                                                                                                                                                                                                                                                                                                                                                                                                                                        |                    |
| Background/rationale      | 2      | Explain the scientific background and rationale for the investigation being reported                                                                                                                                                                                                                                                                                                                                                                                   | 5,6                |
| Objectives                | 3      | State specific objectives, including any pre-specified hypotheses                                                                                                                                                                                                                                                                                                                                                                                                      | 6                  |
| <b>Methods</b>            |        |                                                                                                                                                                                                                                                                                                                                                                                                                                                                        |                    |
| Study design              | 4      | Present key elements of study design early in the paper                                                                                                                                                                                                                                                                                                                                                                                                                | 7                  |
| Setting                   | 5      | Describe the setting, locations, and relevant dates, including periods of recruitment, exposure, follow-up, and data collection                                                                                                                                                                                                                                                                                                                                        | 6,7                |
| Participants              | 6      | (a) <i>Cohort study</i> —Give the eligibility criteria, and the sources and methods of selection of participants. Describe methods of follow-up<br><i>Case-control study</i> —Give the eligibility criteria, and the sources and methods of case ascertainment and control selection. Give the rationale for the choice of cases and controls<br><i>Cross-sectional study</i> —Give the eligibility criteria, and the sources and methods of selection of participants | 6,7                |
|                           |        | (b) <i>Cohort study</i> —For matched studies, give matching criteria and number of exposed and unexposed<br><i>Case-control study</i> —For matched studies, give matching criteria and the number of controls per case                                                                                                                                                                                                                                                 | NA                 |
| Variables                 | 7      | Clearly define all outcomes, exposures, predictors, potential confounders, and effect modifiers. Give diagnostic criteria, if applicable                                                                                                                                                                                                                                                                                                                               | 7,8,9,10           |
| Data sources/ measurement | 8*     | For each variable of interest, give sources of data and details of methods of assessment (measurement). Describe comparability of assessment methods if there is more than one group                                                                                                                                                                                                                                                                                   | 7,8,9,10           |
| Bias                      | 9      | Describe any efforts to address potential sources of bias                                                                                                                                                                                                                                                                                                                                                                                                              | 8,10,11            |
| Study size                | 10     | Explain how the study size was arrived at                                                                                                                                                                                                                                                                                                                                                                                                                              | 10                 |
| Quantitative variables    | 11     | Explain how quantitative variables were handled in the analyses. If applicable, describe which groupings were chosen and why                                                                                                                                                                                                                                                                                                                                           | 7,8,9,10           |
| Statistical methods       | 12     | (a) Describe all statistical methods, including those used to control for confounding                                                                                                                                                                                                                                                                                                                                                                                  | 10,11              |
|                           |        | (b) Describe any methods used to examine subgroups and interactions                                                                                                                                                                                                                                                                                                                                                                                                    | 10,11              |
|                           |        | (c) Explain how missing data were addressed                                                                                                                                                                                                                                                                                                                                                                                                                            | 11                 |
|                           |        | (d) <i>Cohort study</i> —If applicable, explain how loss to follow-up was addressed<br><i>Case-control study</i> —If applicable, explain how matching of cases and controls was addressed<br><i>Cross-sectional study</i> —If applicable, describe analytical methods taking account of sampling strategy                                                                                                                                                              | 14                 |
|                           |        | (e) Describe any sensitivity analyses                                                                                                                                                                                                                                                                                                                                                                                                                                  | 11                 |
| <b>Results</b>            |        |                                                                                                                                                                                                                                                                                                                                                                                                                                                                        |                    |
| Participants              | 13*    | (a) Report numbers of individuals at each stage of study—eg numbers potentially eligible, examined for eligibility, confirmed eligible, included in the study, completing follow-up, and analysed                                                                                                                                                                                                                                                                      | 11,12              |
|                           |        | (b) Give reasons for non-participation at each stage                                                                                                                                                                                                                                                                                                                                                                                                                   | Figure 1           |

|                          |     |                                                                                                                                                                                                              |                             |
|--------------------------|-----|--------------------------------------------------------------------------------------------------------------------------------------------------------------------------------------------------------------|-----------------------------|
|                          |     | (c) Consider use of a flow diagram                                                                                                                                                                           | Figure 1                    |
| Descriptive data         | 14* | (a) Give characteristics of study participants (eg demographic, clinical, social) and information on exposures and potential confounders                                                                     | 12 + Table 1 + Table 1 supp |
|                          |     | (b) Indicate number of participants with missing data for each variable of interest                                                                                                                          | 12                          |
|                          |     | (c) <i>Cohort study</i> —Summarise follow-up time (eg, average and total amount)                                                                                                                             | 12                          |
| Outcome data             | 15* | <i>Cohort study</i> —Report numbers of outcome events or summary measures over time                                                                                                                          | 12 + Table 1                |
|                          |     | <i>Case-control study</i> —Report numbers in each exposure category, or summary measures of exposure                                                                                                         |                             |
|                          |     | <i>Cross-sectional study</i> —Report numbers of outcome events or summary measures                                                                                                                           |                             |
| Main results             | 16  | (a) Give unadjusted estimates and, if applicable, confounder-adjusted estimates and their precision (eg, 95% confidence interval). Make clear which confounders were adjusted for and why they were included | 12 + Table 2                |
|                          |     | (b) Report category boundaries when continuous variables were categorized                                                                                                                                    |                             |
|                          |     | (c) If relevant, consider translating estimates of relative risk into absolute risk for a meaningful time period                                                                                             |                             |
| Other analyses           | 17  | Report other analyses done—eg analyses of subgroups and interactions, and sensitivity analyses                                                                                                               | 13 + Table 3                |
| <b>Discussion</b>        |     |                                                                                                                                                                                                              |                             |
| Key results              | 18  | Summarise key results with reference to study objectives                                                                                                                                                     | 13                          |
| Limitations              | 19  | Discuss limitations of the study, taking into account sources of potential bias or imprecision. Discuss both direction and magnitude of any potential bias                                                   | 14                          |
| Interpretation           | 20  | Give a cautious overall interpretation of results considering objectives, limitations, multiplicity of analyses, results from similar studies, and other relevant evidence                                   | 13,14                       |
| Generalisability         | 21  | Discuss the generalisability (external validity) of the study results                                                                                                                                        | 15                          |
| <b>Other information</b> |     |                                                                                                                                                                                                              |                             |
| Funding                  | 22  | Give the source of funding and the role of the funders for the present study and, if applicable, for the original study on which the present article is based                                                | 16                          |

\*Give information separately for cases and controls in case-control studies and, if applicable, for exposed and unexposed groups in cohort and cross-sectional studies.

**Note:** An Explanation and Elaboration article discusses each checklist item and gives methodological background and published examples of transparent reporting. The STROBE checklist is best used in conjunction with this article (freely available on the Web sites of PLoS Medicine at <http://www.plosmedicine.org/>, Annals of Internal Medicine at <http://www.annals.org/>, and Epidemiology at <http://www.epidem.com/>). Information on the STROBE Initiative is available at [www.strobe-statement.org](http://www.strobe-statement.org).

# BMJ Open

## Is self-esteem associated with self-rated health among French college students? An epidemiological longitudinal study, the i-Share cohort

|                                 |                                                                                                                                                                                                                                                                                                                                                                                                                                                                                                                                                                                                                                                                                    |
|---------------------------------|------------------------------------------------------------------------------------------------------------------------------------------------------------------------------------------------------------------------------------------------------------------------------------------------------------------------------------------------------------------------------------------------------------------------------------------------------------------------------------------------------------------------------------------------------------------------------------------------------------------------------------------------------------------------------------|
| Journal:                        | <i>BMJ Open</i>                                                                                                                                                                                                                                                                                                                                                                                                                                                                                                                                                                                                                                                                    |
| Manuscript ID                   | bmjopen-2018-024500.R1                                                                                                                                                                                                                                                                                                                                                                                                                                                                                                                                                                                                                                                             |
| Article Type:                   | Research                                                                                                                                                                                                                                                                                                                                                                                                                                                                                                                                                                                                                                                                           |
| Date Submitted by the Author:   | 21-Feb-2019                                                                                                                                                                                                                                                                                                                                                                                                                                                                                                                                                                                                                                                                        |
| Complete List of Authors:       | Arsandaux, Julie; Univ. Bordeaux, Inserm, Bordeaux Population Health Research Center, team HEALTHY, UMR 1219, F-33000<br>Michel, Grégory; Univ. Bordeaux, Inserm, Bordeaux Population Health Research Center, team HEALTHY, UMR 1219, F-33000<br>Tournier, Marie; Univ. Bordeaux, Inserm, Bordeaux Population Health Research Center, team HEALTHY, UMR 1219, F-33000 ; Centre Hospitalier Perrens<br>Tzourio, Christophe; Univ. Bordeaux, Inserm, Bordeaux Population Health Research Center, team HEALTHY, UMR 1219, F-33000<br>Galéra, Cédric; Univ. Bordeaux, Inserm, Bordeaux Population Health Research Center, team HEALTHY, UMR 1219, F-33000 ; Centre Hospitalier Perrens |
| <b>Primary Subject Heading</b>: | Public health                                                                                                                                                                                                                                                                                                                                                                                                                                                                                                                                                                                                                                                                      |
| Secondary Subject Heading:      | Epidemiology, Mental health                                                                                                                                                                                                                                                                                                                                                                                                                                                                                                                                                                                                                                                        |
| Keywords:                       | self-esteem, self-rated health, psychological determinants, students, cohort study                                                                                                                                                                                                                                                                                                                                                                                                                                                                                                                                                                                                 |
|                                 |                                                                                                                                                                                                                                                                                                                                                                                                                                                                                                                                                                                                                                                                                    |

SCHOLARONE™  
Manuscripts

1  
2  
3  
4  
5  
6  
7  
8  
9  
10  
11  
12  
13

# Is self-esteem associated with self-rated health among French college students? An epidemiological longitudinal study, the i-Share cohort

14 Julie Arsandaux, Msc, Ph.D Candidate\*<sup>a</sup>, Grégory Michel, Ph.D<sup>a</sup>, Marie Tournier, M.D,  
15 Ph.D<sup>a,b</sup>, Christophe Tzourio, M.D, Ph.D<sup>a</sup> and Cédric Galéra, M.D, Ph.D<sup>a,b</sup>  
16  
17  
18  
19  
20  
21

22 <sup>a</sup> Univ. Bordeaux, Inserm, Bordeaux Population Health Research Center, team HEALTHY,  
23 UMR 1219, F-33000 Bordeaux, France.  
24  
25

26  
27 <sup>b</sup> Centre Hospitalier Perrens, Bordeaux, France.  
28  
29  
30  
31  
32

33 **Corresponding Author:** Julie Arsandaux  
34

35 Postal address:  
36

37 Université de Bordeaux, ISPED  
38

39 146, rue Léo Saignat – CS61292  
40

41 33076 Bordeaux cedex, FRANCE  
42

43 Tel: +33 (0) 689626100 or Tél: + 33 (0) 5 57 57 16 59/ Fax: + 33 (0) 5 47 30 42 09  
44

45 E-mail: julie.arsandaux@u-bordeaux.fr  
46  
47  
48  
49

50 Word count (exc. figures/tables): 3441  
51  
52  
53  
54  
55  
56  
57  
58  
59  
60

1  
2  
3 **ABBREVIATIONS**  
4

5  
6 95%CI: 95% Confidential Interval  
7

8  
9 BMI: Body Mass Index  
10

11  
12 IQR: Interquartile range  
13

14  
15 MICE: Multivariate Imputation by Chained Equations  
16

17  
18 OR: Odds Ratio  
19

20  
21 p: p-value  
22  
23  
24  
25  
26  
27  
28  
29  
30  
31  
32  
33  
34  
35  
36  
37  
38  
39  
40  
41  
42  
43  
44  
45  
46  
47  
48  
49  
50  
51  
52  
53  
54  
55  
56  
57  
58  
59  
60

For peer review only

## ABSTRACT

**Objectives:** The aim of the study was to estimate the association between self-esteem and subsequent self-rated health during college years taking into account a wide range of potential confounders.

**Design:** Prospective longitudinal study.

**Setting:** The French i-Share cohort.

**Participants:** The sample consisted of 1011 college students.

**Primary and secondary outcome measures:** The association between self-esteem and later self-rated health was evaluated using multivariate modeling.

Data regarding self-rated health, global self-esteem, and demographic, educational, social, behavioral, environmental and financial characteristics were collected through an internet-based questionnaire.

**Results:** The 1011 participants had a median age of 21.9 years and 79% (795/1011) were females. Self-rated health was assessed a median of 8 months after the self-esteem measurement. Twenty percent of the students declared average to very poor health (203/1011). Students with higher levels of self-esteem were more likely to declare good or very good self-rated health (adjusted odds ratio=1.40, 95% confidence interval [1.15-1.72], p-value=0.001). Other factors associated with good or very good self-rated health were low body mass index, a comfortable financial situation during childhood and three personality traits (low persistence and harm avoidance and high cooperativeness).

**Conclusions:** This study offers novel findings on the impact of self-esteem on self-rated health among college students. Interventions targeting self-esteem should be experimented during university years in order to improve health outcomes.

**Keywords:** self-esteem; self-rated health; psychological determinants; students; cohort study

## ARTICLE SUMMARY

### Strengths and limitations of this study

- The present study is based on a prospective design among a large number of participants
- A broad adjustment for confounders have been used to estimate unbiased association
- This study investigates self-rated health among college students, a population that has received less attention in the literature
- Participants were volunteers in the i-Share project which could have arisen a sampling bias. Extrapolation to other student populations may be limited.
- Reverse causation between self-esteem and self-rated health may exist and could not be investigated with our design.

### AUTHORS CONTRIBUTIONS

J. Arsandaux and C. Galera developed the study concept and the study design. C. Tzourio is the principal investigator of the i-Share Cohort. M. Tournier and G. Michel participated actively in the creation of mental health questionnaire and bring psychological and psychiatric expertise to the interpretation of the results. J. Arsandaux performed the data analysis and interpretation under the supervision of C. Galera. J. Arsandaux drafted the manuscript, and all co-authors provided critical revisions. All authors approved the final version of the manuscript for submission.

### DATA AVAILABILITY

The scientific comitee of the i-share cohort can be conTacted for deidentified participant data transfert.

## INTRODUCTION

Self-rated health is considered to be a relevant indicator of general health. The high validity, reliability and predictive power of self-rated health make it one of the best predictors of objective health problems (including mortality) and health care utilization (1–6). Collection of self-rated health is recommended by the World Health Organization (WHO) as a standard and cost-effective measure in health surveys (7–10).

The associations between self-rated health and mortality persisted even after objective health adjustment, suggesting that self-rated health could represent an inclusive and universal predictor besides clinical examination, medical records or self-reports of medical conditions (11).

Determinants of self-rated health problems have attracted interdisciplinary interest. Several studies have investigated demographic, educational, social, behavioral, environmental and financial determinants (12). In addition, a few studies have emphasized the associations between psychosocial resources and self-rated health assessment (13,14). However, there are important limitations in the literature which should be underlined.

First, despite recent research, psychosocial resources are insufficiently investigated in the literature (14). Among individual characteristics, the impact of self-esteem (i.e. the overall aggregated opinion of oneself at any one time, as defined by Rosenberg) on the rating of one's health remains poorly understood. Yet, it should be noted that self-esteem is a potentially modifiable factor. If self-esteem is predictive of self-rated health independently of other psychosocial confounders it could then represent a specific target for preventive interventions aiming at improving general health. Interestingly efficient interventions focusing on psychosocial abilities and self-knowledge provide relevant tools to experiment such specific interventions on self-esteem (15,16). To our knowledge, only two studies have estimated the association between self-esteem and self-rated health, and none among college students (17,18). These studies have reported a significant relation supporting the hypothesis that high self-esteem is associated with better self-rated health. In addition, several studies have evidenced



1  
2  
3 associations between self-esteem and several important outcomes related with health: academic  
4 success, well-being and internalized/externalized mental health problems (18,19).  
5  
6

7  
8 Second, the population of college students has received little attention in this specific domain. Yet this  
9  
10 period corresponding to the transition between adolescence and adulthood is crucial for the  
11  
12 development of individuals, as well as for constructing and reinforcing self-esteem. Although the  
13  
14 student population is in relatively good health, it is noteworthy that mental health and substance use  
15  
16 issues are prevalent during the college years (20–22). On the one hand, self-rated health can serve to  
17  
18 evaluate a general health status predicting future health problems before they set in. On the other hand,  
19  
20 college is a period of development in which interventions could modify the onset of determinants such  
21  
22 as psychosocial resources  
23

24  
25 A final limitation is the lack of studies that comprehensively adjust for various risk factors (i.e. the six  
26  
27 domains reported above). This implies possible confounding biases that need to be addressed in order  
28  
29 to identify a significant target for early public health interventions, such as self-esteem (12).  
30  
31

32  
33 The aim of the present study was to estimate the association between self-esteem and subsequent self-  
34  
35 rated health during college years, taking into account a wide range of potential confounders in the i-  
36  
37 Share cohort.  
38  
39  
40  
41

## 42 **METHODS**

### 43 *Study population*

44  
45  
46 This study is based on the Internet-based Students Health Research Enterprise (i-Share, www.i-  
47  
48 share.fr) project, a prospective population-based cohort study of students in higher education  
49  
50 institutions in France. . The i-Share cohort, one of the largest epidemiological studies conducted on  
51  
52 European students, constitutes an opportunity to investigate this research question thanks to its large  
53  
54 longitudinal collection of multidimensional data on childhood context, lifestyle, health information,  
55  
56  
57  
58  
59  
60

1  
2  
3 living conditions and mental and psychosocial examinations(23,24). The objectives of i-Share cohort  
4 are to evaluate important health aspects among university students over the course of 10 years.  
5  
6 Eligibility criteria are to be officially enrolled at a university or higher education institute, to be at least  
7  
8 18 years of age, to be able to read and understand French and to provide informed consent for  
9  
10 participation. Recruitment started in February 2013. Students were informed about the objectives of  
11  
12 the study through promotion campaigns. Specifically, a group of trained students informed their peers  
13  
14 about the study and initiate the online recruitment process. The baseline inquiry collected information  
15  
16 on students' health, personal and family medical histories, socio-demographic characteristics, and  
17  
18 lifestyle habits. Next, students received an e-mail invitation to complete follow-up questionnaires and  
19  
20 sub-study data collection. As of February 6, 2016, 14 795 participants were included in the cohort,  
21  
22 there are 21 year old in mean, 74% are female and the response rate for one-year follow-up is 6%.  
23  
24 Since December 2015, an optional mental health survey has been implemented to provide data on  
25  
26 several dimensions of mental and psychological health. To date, the i-Share cohort is still ongoing. For  
27  
28 this specific study, we used data available as of April 29th, 2016. We used a longitudinal design to  
29  
30 compare self-esteem data collected during the mental health sub-study (Time 2) with the next planned  
31  
32 assessment of self-rated health (i.e. during the 1<sup>st</sup> follow-up of the cohort, Time 3). We used baseline  
33  
34 characteristics collected at cohort inclusion for adjustment (Time 1). Figure S1 describes the study  
35  
36 timeline in supplementary material. Only college students aged between 18 and 30 years old,  
37  
38 participating in the mental health sub-study before their 1<sup>st</sup> follow-up were included. The i-Share  
39  
40 project on which this study was based was approved by the Commission Nationale de l'Informatique et  
41  
42 des Libertés (CNIL) [DR-2013-019].  
43  
44  
45  
46  
47

### ***'Patient and Public Involvement'***

48  
49 No participant were involved in setting the research question or the outcome measures, nor  
50  
51 were they involved in developing plans for design of the study. No participants were asked to advise  
52  
53 on interpretation or writing up of results. However, there are plans to disseminate the results of the  
54  
55 research to study participants by the use of the i-share website and social networks and by means of a  
56  
57  
58  
59  
60

1  
2  
3 newsletter send to participant quarterly via email. Furthermore, a group of trained students participated  
4 during the recruitment process (i.e. informed their peers about the study and initiate the online  
5 recruitment process). These students have been also involved during communication campaign,  
6  
7 advising the study team about priority messages and communication tools.  
8  
9  
10

## 11 ***Measures and scales***

### 12 *Outcome: Self-rated health*

13  
14  
15 Students gauged their current general self-rated health by the question: “Do you consider your current  
16  
17 health?” with a five-point response scale ranging from 1 to 5 (1=“Very poor” / 2=“Poor” /  
18  
19 3=“Average” / 4=“Good” / 5=“Very good”). The variable was dichotomized as follows: “Very good /  
20  
21 Good” versus “Average / Poor / Very poor”. Psychometric performance of this assessment has been  
22  
23 reported in two papers (8,9). Self-rated health was measured at the participant’s inclusion and during  
24  
25 follow-up questionnaires. The 1<sup>st</sup> follow-up self-rated health measure corresponded to the primary  
26  
27 outcome of this study (Time 3).  
28  
29  
30  
31  
32

### 33 *Main variable of interest: Self-esteem*

34  
35 Self-esteem was assessed using the Self-esteem scale (Rosenberg, 1965), a 10-item self-report  
36  
37 measure of global self-esteem. Each item is answered on a 4-point Likert type scale ranging from  
38  
39 1=“Strongly disagree” to 4=“Strongly agree”. The score can range from 10 (low level of self-esteem)  
40  
41 to 40 (high level of self-esteem). The Rosenberg Self-esteem Scale is the most widely used instrument  
42  
43 for the measurement of global self-esteem (25). It was translated into French, and its high reliability  
44  
45 and validity were confirmed with a French sample (26). Self-esteem measurement was part of the  
46  
47 optional mental health survey (Time 2). We used a continuous score for the primary analysis.  
48  
49  
50

### 51 *Covariates*

52  
53 All the covariates were collected through the self-administered online questionnaire at cohort  
54  
55 enrolment (Time 1), except for psychosocial covariates which are part of the mental health sub-study  
56  
57 (i.e. same time as self-esteem measurement, Time 2). They were all preceding the outcome to keep the  
58  
59  
60

1  
2  
3 longitudinal sequence between predictors and outcome. Covariates included in this study covered the 6  
4 domains of potential determinants of self-rated health described in the literature (12):

5  
6  
7  
8 *Demographic covariates:* We built the following demographic variables: *sex* (male/female), *age* (in  
9 years when the outcome was measured, Time 3).

10  
11  
12  
13 *Academic covariates:* *Education level of student* was collected at cohort inclusion and categorized  
14 into: freshman, sophomore, junior and senior. For *parental education level*, we used the declared  
15 education level of parents by students (at least one of their parents had a higher education level than  
16 baccalaureate versus not).

17  
18  
19  
20  
21  
22 *Financial covariates:* *Self-rated economic situation during childhood* (“*Very*  
23 *difficult*”/“*Difficult*”/“*Correct*” versus “*Comfortable*”/“*Very comfortable*”) and *self-rated*  
24 *satisfaction about financial resources during college* (“*Very satisfied*”/“*Rather satisfied*” versus  
25 “*Satisfied*”/“*Rather dissatisfied*”/“*Totally unsatisfied*”).

26  
27  
28  
29  
30  
31 *Social covariates:* Students *living conditions* (cohabitation with parents, flatsharing/couple or alone)  
32 and *self-rated familial support during childhood* (Weak “*None at all*”/ “*A little*”/“*Moderate*” versus  
33 High “*A lot*”/“*Enormous*”).

34  
35  
36  
37  
38 *Geographical covariates:* Students included in this study were spread over the French territory. To  
39 take into account disparities across college campuses we selected the 4 most constitutive *cities of the*  
40 *registration university* in the sample (Bordeaux/Versailles/Nice/Paris/other).

41  
42  
43  
44  
45 *Behavioral covariates:* *Tobacco consumption* (none,  $\leq 10$  cigarettes/day,  $> 10$  cigarettes/day). *Binge*  
46 *drinking frequency* was defined as drinking at least 6 drinks on the same occasion (evening) (Never,  
47 Rarely if “*Once a year*”, Occasionally if “*several times a year*”/“*once a month*”, Frequently if “*once a*  
48 *week or less*”/“*2 to 3 times a week*”/“*4 to 6 times a week*”). Then students declared whether at least  
49 once in life they consumed *psychoactive substances* from cannabis, ecstasy, amphetamines, nitrous  
50 oxide, inhalation products and cocaine. To determine *physical activity frequency*, we combined  
51 walking times and sports by summing the count number of duration in minutes per day ( $< 25$ , between  
52  
53  
54  
55  
56  
57  
58  
59  
60

1  
2  
3 25 to 35, >35). *Body Mass Index (BMI)* (<25 vs >=25 kg/m<sup>2</sup>). Finally, good nutritional habits was  
4 based on adherence to The French National Nutrition and Health Program (PNNS) (27). Each of the  
5 seven nutrition recommendation was coded 0 if not followed and 1 if followed. The sum (7  
6 representing the highest adherence to recommendations and 0 the lowest) was computed.  
7  
8  
9

10  
11  
12 *Psychosocial covariates: Coping* was measured by the Student Coping Scale (28). Three sub-scores  
13 are computed representing social support coping, emotional coping and festive coping (higher score  
14 represented higher coping resources). *Aggressiveness* was measured by an adaptation of the Brown-  
15 Goodwin assessment for Life History of Aggression, translated into French by Bellivier (29). Higher  
16 scores represented higher aggressiveness. *Impulsivity* was measured by an Adolescent Version of the  
17 Barratt Impulsiveness Scale-11 (BIS-11-A) translated into French by Coudrey F. and Michel G (30).  
18 Higher score represent higher impulsivity. *Personality traits* were measured by the Temperament and  
19 Character Inventory translated into French by Pélissolo F (31,32). Six sub-scores were computed:  
20 novelty seeking, persistence, harm avoidance, determination, reward dependence and cooperativeness.  
21 Higher scores represented higher adherence to the type of personality.  
22  
23  
24  
25  
26  
27  
28  
29  
30  
31  
32  
33

34 *Objective health indicator:* participants with at least one medical diagnosis for mental or physical  
35 diseases or disability at cohort inclusion.  
36  
37  
38

### 39 ***Study size***

40  
41 We performed a sample size calculation for logistic regression between self-esteem and self-rated  
42 health, alpha 0.05 and power 0.90. Based on two French studies among college students, we assumed  
43 that the distribution of self-esteem was normal (mean=28.9, standard deviation=5.7) (33,34). The  
44 proportion of participants who declare having good or very good health has been estimated in 2 studies  
45 in Sweden and Italy among college students to be 13 and 23% respectively (35,36). We assumed the  
46 odds ratio (OR) to be 1.1 based on the only two studies reported among high school students in South  
47 Korea and adults in Canada (1,17). The minimum sample size required was between 232 and 344  
48 depending on self-rated health proportions (SAS software PROC POWER).  
49  
50  
51  
52  
53  
54  
55  
56  
57  
58  
59  
60

### *Statistical analysis*

First we described the study sample. Then, in order to estimate the association between self-esteem and self-rated health, we computed a logistic regression model. We modeled the probability of declaring good or very good self-rated health during the 1st follow-up. The primary explanatory variable was self-esteem. To allow relevant interpretation, we estimate associations for the increase of one standard deviation (i.e. 5.696). All the potential confounders described above were entered in the model as covariates. In the modeling process, we first estimated univariate models. Log-linearity of the effect of self-esteem (continuous variable) was checked. We tested interactions for gender, age and cities among self-rated health and self-esteem links by univariate models and performed stratified analysis if the interaction was significant ( $p < 0.05$ ). Then we selected variables if  $p\text{-value} < 0.25$  to compute multivariate models. Finally, we performed a stepwise backward selection for a final multivariate model with a threshold of  $p\text{-value} = 0.05$ . At every step, we checked the confusion effect and computed the OR, 95% confidential interval (95%CI) and  $p\text{-value}$  ( $p$ ) of the corresponding Wald test.

Finally we conducted sensitivity analyses to test the robustness of the findings: (1) modeling self-rated health (a) in continuous variable (ranging from 1 to 5) and (b) in three categories (with an “average” modality); (2) estimating the self-esteem effect throughout a categorized variable (corresponding to quartiles:  $\leq 25$ ,  $]25-28]$ ,  $]28-33]$ ,  $>33$ ) to bring to light a potential dose-response effect; (3) completing the adjustment (a) with baseline self-rated health; (b) forcing the adjustment with delays between the three measurement periods; (c) with objective health indicator; (4) performing primary modeling among the complete case population.

Our missing data analysis procedures used missing at random (MAR) assumptions. We used the MICE (multivariate imputation by chained equations) method of multiple multivariate imputation in SAS software (PROC MI and MIANALYZE) (37,38). We independently analyzed 10 copies of the data, each with missing values suitably imputed, in the multivariate logistic regression analyses. We averaged estimates of the variables to give a single mean estimate and adjusted standard errors

1  
2  
3 according to Rubin's rules. We imputed only data from covariates using self-esteem, self-rated health,  
4 covariates data and completed imputation process with other data collected in the i-share cohort  
5 (alcohol consumption, walking time per day, time of sport practice, stress score, anxiety score,  
6 depression score and self-rated quality of sleep).  
7  
8  
9  
10

11  
12 We performed all analyses using the SAS statistical software (SAS version 9.3; SAS Institute Inc,  
13 Cary, NC).  
14  
15  
16  
17  
18

## 19 RESULTS

20  
21 The total sample comprised 1011 participants. Figure 1 shows the flow chart of the study population.  
22  
23 Of the 14795 college students enrolled in the i-Share cohort, 3613 completed the mental health sub-  
24 study, 1038 were eligible for this study and 1011 were ultimately analyzed. Prospective self-rated  
25 health assessment (i.e. during the 1st follow-up, Time 3) occurred between 1 and 3 years after  
26 inclusion in the cohort (Median=13.2 months) and between 1 month and 3 years after completion of  
27 the mental health sub-study (i.e. self-esteem measure, Time 2) (Median=8.4 months). Main baseline  
28 characteristics of the study population are presented in Table 1 and the complete description in Table  
29 S1 in supplementary material. The mean age of participants was 20.8 (Standard deviation=2.3) years,  
30 795/1011 (79%) were female, 367/1011 (37%) were freshmen and most students were in Bordeaux  
31 (686/1011, 68%). 346/1011 (34%) participants had at least one missing data item among covariates.  
32 BMI and living situation were the most frequently missing variables (15% and 12% respectively) and  
33 other missing variables accounted for less than 5% of missing data. At inclusion, 18% of the students  
34 declared average or poor health (183/1011). At 1st follow-up, 20% of the students declared average or  
35 poor health (203/1011). Table S2 in supplementary material compare participants of the i-Share cohort  
36 versus the study sample.  
37  
38  
39  
40  
41  
42  
43  
44  
45  
46  
47  
48  
49  
50  
51

52  
53 Self-esteem among students who declared average or poor health at 1st follow-up was lower than  
54 students who declared good or very good health (mean=26.2, 95%CI [25.4-27.0] versus mean=28.1,  
55 95%CI [28.8-29.5],  $p < 0.0001$ ). Table 2 presents the final model with crude and adjusted odds ratio  
56  
57  
58  
59  
60

1  
2  
3 and Table S3 in supplementary material presents the whole modeling process after imputation of  
4 missing data. The unadjusted self-esteem effect (for the increase of one standard deviation) on self-  
5 rated health was statistically significant (OR=1.70, 95%CI [1.44-1.99],  $p<0.0001$ ). Log-linearity of the  
6 self-esteem effect was confirmed, allowing a valid estimation. All predefined interactions (gender,  
7 cities and age) were not statistically significant (all  $p$ -values  $>0.10$ ). The final multivariate model was  
8 adjusted for BMI, financial situation during childhood and 3 personality traits (persistence, harm  
9 avoidance and cooperativeness). With this final model, the increase of one standard deviation of self-  
10 esteem was associated with a 40% increase in the probability of declaring good or very good health  
11 versus average to very poor health (adjusted OR=1.40, 95%CI [1.15-1.72],  $p=0.001$ ).

12  
13 BMI $>25$  kg/m<sup>2</sup>, difficult financial situation during childhood decreased by 2 the probability of  
14 declaring good to very good health. Three personality traits were associated with self-rated health: low  
15 persistence and harm avoidance and high cooperativeness were associated with declaring good to very  
16 good health. The restraint model showed acceptable discrimination power (Area Under Curve=0.7205)  
17 and the Hosmer-Lemeshow test proved model suitability to data ( $p$ -value=0.8614).

18  
19 Table 3 presents sensitivity analysis results showing the robustness of findings. Whatever the  
20 modeling choices for self-rated health and self-esteem or adjusting strategies, higher self-esteem was  
21 persistently associated with better self-rated health. Furthermore, the model with self-esteem in four  
22 categories showed a dose-response effect with graduate adjusted OR and a significant global test  
23 ( $p<0.04$ ).

## 24 **DISCUSSION**

### 25 **Findings of study**

26  
27 In this large longitudinal study among college students, higher self-esteem levels were independently  
28 associated with better self-rated health, even after complete adjustment for known confounders. This  
29 association was not modified by gender or age. Additional risk factors such as BMI, financial situation  
30 during childhood and personality traits (persistence, harm avoidance and cooperativeness) were  
31  
32  
33  
34  
35  
36  
37  
38  
39  
40  
41  
42  
43  
44  
45  
46  
47  
48  
49  
50  
51  
52  
53  
54  
55  
56  
57  
58  
59  
60



1  
2  
3 associated with self-rated health. This original finding opens up an opportunity for interventional  
4 research targeting psychosocial resources, especially self-esteem, in the university setting.  
5  
6  
7

### 8 **Interpretation**

9

10  
11 The association between higher levels of self-esteem and better self-rated health found in the current  
12 study corroborates previous research. This finding based on a sample of college students, supports and  
13 extends previous studies on other population samples by showing the same pattern of association  
14 between self-esteem and self-rated health (17,1). Several research works and literature reviews  
15 formulate hypotheses on the potential underlying mechanisms which could explain the relationship  
16 between self-esteem and health. Good self-esteem may enable individuals to make better choices,  
17 including adopting healthy behaviors (19). High self-esteem may increase the ability to put in place  
18 appropriate strategies to cope with everyday situations, which in turn increases the capacity to feel  
19 well and more generally the capacity of resilience (39). An alternative hypothesis is based on bodily  
20 sensations (i.e. information that conveys messages from the organism to the brain). This information is  
21 available to the individual consciousness, is included in self-rating of health and may reflect important  
22 physiological dysregulations, such as inflammatory processes (40). In this hypothesis, self-esteem  
23 appears to be a psychosocial ability that allows individuals to better cope with stress and prevents or  
24 diminishes these deleterious inflammatory processes. Throughout the literature, several determinants  
25 of self-rated health have been found (12). Consistently, we found in our study that a low BMI, a  
26 comfortable financial situation during childhood and three personality traits were associated with good  
27 self-rated health. In contrast to the literature, we have not found gender differences for self-rated  
28 health after complete adjustment (41–43)  
29  
30  
31  
32  
33  
34  
35  
36  
37  
38  
39  
40  
41  
42  
43  
44  
45  
46  
47

48  
49 . This discordant result could be due to differences in sampling and adjustment strategies. In particular,  
50 fewer males than women participated in the i-Share cohort. Moreover, we found that self-rated health  
51 was influenced more by the family's financial difficulties during childhood than during college years.  
52  
53  
54  
55

### 56 **Strengths and limitations**

57  
58  
59  
60

1  
2  
3 The strengths of our study include the longitudinal design, the standardized assessment tools and the  
4 broad adjustment for confounders. In addition, this study investigates self-rated health among college  
5 students, a population that has received less attention in the literature. Although the study sample  
6 included only a fraction of the original I-Share cohort, the number of participants was still relatively  
7 high compared to the available studies in the area. A set of limitations should however be considered  
8 to properly interpret the findings. First, a sampling bias could have arisen since participants were  
9 mainly healthy female students thus limiting the generalization to other student populations. Since  
10 young females usually have lower self-reported health than males caution should be taken regarding  
11 the extrapolation of the results to males(44). Second, we used a longitudinal design with a median  
12 follow-up period of 8 months, which is relevant to assess impact on self-rated health in young adults.  
13 But we do not have any information on persistency of the self-esteem/self-rated health relationship in  
14 the longer term, especially after the academic years. Moreover, reverse causation between self-esteem  
15 and self-rated health may exist and could not be investigated with our design. However, in sensitivity  
16 analyses, when self-rated health measurement prior to self-esteem was entered in the model as a  
17 covariate, the result remained similar. Further research should use repeated self-esteem and self-rated  
18 health measurements to better explore the bidirectionality assumption.

### 37 **Implications**

38  
39 From a public health perspective this study provides a contributive insight for interventional research.  
40 It suggests that interventions targeting self-esteem during college years should be experimented. Yet  
41 the type of intervention is still to be determined since most of the previous interventional research on  
42 self-esteem has concerned children (15,16). Consequently, further studies are needed to investigate  
43 whether these interventions could be extended or transferred to college students.. Self-esteem  
44 improvement interventions could focus either on (1) global self-esteem by increasing self-knowledge  
45 and resilience through an individual intervention, web-based for instance, or (2) a specific dimension  
46 such as social self-esteem by using exercise or mentoring program (15,16). Further, the university  
47  
48  
49  
50  
51  
52  
53  
54  
55  
56  
57  
58  
59  
60

1  
2  
3 years represent a relevant period for implementing early interventions, before health behaviors and  
4  
5 mental health problems set in.  
6  
7

8 From a research perspective, we have identified two priority areas. First, it appears necessary to better  
9  
10 understand the pathways between self-esteem and self-rated health conducting mediational analyses.  
11  
12 Second, the self-reported nature of the 2 measures (i.e. self-esteem and self-rated health) might explain  
13  
14 why they are linked (40). Considering that self-esteem has been reported to be linked with health  
15  
16 outcomes other than self-rated health, we believe that associations with both the evaluation framework  
17  
18 and health are coexisting.  
19  
20  
21  
22  
23

## 24 **ACKNOWLEDGEMENTS**

25  
26  
27 The authors are indebted to the participants of the i-Share project for their commitment and  
28  
29 cooperation and to the entire i-Share staff for their expert contribution and assistance.  
30  
31  
32  
33  
34

## 35 **FUNDING**

36  
37 The i-Share research project has received funding from the French National Research Agency (Agence  
38  
39 Nationale de la Recherche, ANR) via the program 'Investissements d'Avenir' reference ANR-10-  
40  
41 COHO-05. This study was further supported by a grant from the Excellence Cluster 'Health  
42  
43 Determinants in Societies' HEADS of the University of Bordeaux, managed by the ANR, under the  
44  
45 'Future Investments' program in the framework of the Bordeaux 'Initiatives d'excellence' (IdEx)  
46  
47 program, grant number (ANR-10-IDEX-03-02).  
48  
49  
50  
51  
52  
53

## 54 **CONFLICTS OF INTEREST**

55  
56  
57 None declared  
58  
59  
60

## REFERENCES

1. Chun J, Nam S, Chung I-J, Kang H, Nho CR, Woo S. Factors associated with perceived health among Korean adolescents. *Soc Work Public Health*. 2014;29(6):528-39.
2. Nielsen TH. The Relationship Between Self-Rated Health and Hospital Records. *Health Economics*. 2016;25(4):497-512.
3. Sajjad A, Freak-Poli RL, Hofman A, Roza SJ, Ikram MA, Tiemeier H. Subjective measures of health and all-cause mortality - the Rotterdam Study. *Psychol Med*. août 2017;47(11):1971-80.
4. Breidablik H-J, Meland E, Lydersen S. Self-rated health in adolescence: A multifactorial composite. *Scand J Public Health*. 1 janv 2008;36(1):12-20.
5. Breidablik H-J, Meland E, Lydersen S. Self-rated health during adolescence: stability and predictors of change (Young-HUNT study, Norway). *Eur J Public Health*. janv 2009;19(1):73-8.
6. Idler EL, Benyamini Y. Self-rated health and mortality: a review of twenty-seven community studies. *J Health Soc Behav*. mars 1997;38(1):21-37.
7. Ware J. The assessment of health status. In: *Applications of social science to clinical medicine and health policy*. New Brunswick, NJ: Rutgers University Press; p. 204-28.
8. de Bruin A, And Others. Health Interview Surveys: Towards International Harmonization of Methods and Instruments. WHO Regional Publications, European Series, No. 58 [Internet]. Office of Publications, WHO Regional Office for Europe, Scherfigsvej 8, DK-2100 Copenhagen 0, Denmark (39 Swiss francs).; 1996 [cité 1 août 2017]. Disponible sur: <https://eric.ed.gov/?id=ED394961>
9. Robine J-M, Jagger C. Creating a coherent set of indicators to monitor health across Europe: the Euro-REVES 2 project. *Eur J Public Health*. 1 sept 2003;13(suppl\_3):6-14.
10. DeSalvo KB, Bloser N, Reynolds K, He J, Muntner P. Mortality Prediction with a Single General Self-Rated Health Question. *Journal of General Internal Medicine*. 1 mars 2006;21(3):267-75.
11. Mossey JM, Shapiro E. Self-rated health: a predictor of mortality among the elderly. *Am J Public Health*. août 1982;72(8):800-8.
12. Mantzavinis GD, Pappas N, Dimoliatis IDK, Ioannidis JPA. Multivariate models of self-reported health often neglected essential candidate determinants and methodological issues. *J Clin Epidemiol*. mai 2005;58(5):436-43.
13. Bobak M, Pikhart H, Rose R, Hertzman C, Marmot M. Socioeconomic factors, material inequalities, and perceived control in self-rated health: cross-sectional data from seven post-communist countries. *Soc Sci Med*. nov 2000;51(9):1343-50.
14. Mackenbach JP, Simon JG, Looman CWN, Joung IMA. Self-assessed health and mortality: could psychosocial factors explain the association? *Int J Epidemiol*. déc 2002;31(6):1162-8.
15. King KA, Vidourek RA, Davis B, McClellan W. Increasing self-esteem and school connectedness through a multidimensional mentoring program. *J Sch Health*. sept 2002;72(7):294-9.
16. Ekland E, Heian F, Hagen KB, Abbott J, Nordheim L. Exercise to improve self-esteem in children and young people. *Cochrane Database Syst Rev*. 2004;(1):CD003683.
17. Shields M, Shooshtari S. Determinants of self-perceived health. *Health Rep*. déc 2001;13(1):35-52.

18. Baumeister RF, Campbell JD, Krueger JI, Vohs KD. Does High Self-Esteem Cause Better Performance, Interpersonal Success, Happiness, or Healthier Lifestyles? *Psychol Sci Public Interest*. mai 2003;4(1):1-44.
19. Mann M, Hosman CMH, Schaalma HP, de Vries NK. Self-esteem in a broad-spectrum approach for mental health promotion. *Health Educ Res*. août 2004;19(4):357-72.
20. Degenhardt L, Coffey C, Carlin JB, Swift W, Moore E, Patton GC. Outcomes of occasional cannabis use in adolescence: 10-year follow-up study in Victoria, Australia. *Br J Psychiatry*. avr 2010;196(4):290-5.
21. Mota N, Alvarez-Gil R, Corral M, Rodríguez Holguín S, Parada M, Crego A, et al. Risky alcohol use and heavy episodic drinking among Spanish University students: a two-year follow-up. *Gac Sanit*. oct 2010;24(5):372-7.
22. Van De Ven MOM, Greenwood PA, Engels RCME, Olsson CA, Patton GC. Patterns of adolescent smoking and later nicotine dependence in young adults: a 10-year prospective study. *Public Health*. févr 2010;124(2):65-70.
23. Montagni I, Guichard E, Kurth T. Association of screen time with self-perceived attention problems and hyperactivity levels in French students: a cross-sectional study. *BMJ Open*. 1 févr 2016;6(2):e009089.
24. Galéra C, Salla J, Montagni I, Hanne-Poujade S, Salamon R, Grondin O, et al. Stress, attention deficit hyperactivity disorder (ADHD) symptoms and tobacco smoking: The i-Share study. *Eur Psychiatry*. sept 2017;45:221-6.
25. Blascovich J, Tomaka J. Measures of Self-Esteem. In: *Measures of Personality and Social Psychological Attitudes: Measures of Social Psychological Attitudes*. Academic Press; 2013. p. 115-23.
26. Chambon O, Cornillon-Jacoudon D, Germain M, Assouline B, Landazuri F, Marie-Cardine M. Bien-être subjectif et qualité de vie. Définitions, mesures et facteurs déterminants. Implications thérapeutiques. *Inf Psychiatr*. 1992;(Suppl 5: LVII-LXII).
27. Hercberg S, Chat-Yung S, Chauliac M. The French National Nutrition and Health Program: 2001–2006–2010. *Int J Public Health*. 1 avr 2008;53(2):68-77.
28. Boujut E, Bruchon-Schweitzer M, Dombrowski SU. Coping among Students: Development and validation of an exploratory measure. *Psychology*. août 2012;3(8):562-8.
29. Brown GL, Goodwin FK, Ballenger JC, Goyer PF, Major LF. Aggression in humans correlates with cerebrospinal fluid amine metabolites. *Psychiatry Res*. oct 1979;1(2):131-9.
30. Fossati A, Barratt ES, Acquarini E, Di Ceglie A. Psychometric Properties of an Adolescent Version of the Barratt Impulsiveness Scale-11 for a Sample of Italian High School Students. *Percept Mot Skills*. 1 oct 2002;95(2):621-35.
31. Cloninger CR, Bayon C, Svrakic DM. Measurement of temperament and character in mood disorders: a model of fundamental states as personality types. *Journal of Affective Disorders*. 1 oct 1998;51(1):21-32.
32. Pelissolo A, Mallet L, Baleyte J-M, Michel G, Cloninger CR, Allilaire J-F, et al. The Temperament and Character Inventory-Revised (TCI-R): psychometric characteristics of the French version. *Acta Psychiatrica Scandinavica*. 1 août 2005;112(2):126-33.
33. Estingoy P, Fort E, Normand J-C, Lerond J, D'Amato T. Vulnérabilités psychiques chez les étudiants : à propos de deux enquêtes en santé mentale à l'université Lyon 1. *Annales Médico-psychologiques, revue psychiatrique*. 1 juill 2013;171(6):392-8.
34. Saleh D, Camart N, Romo L. Predictors of Stress in College Students. *Front Psychol [Internet]*. 2017 [cité 1 août 2017];8. Disponible sur: <http://journal.frontiersin.org/article/10.3389/fpsyg.2017.00019/full>

- 1
- 2
- 3 35. Von Bothmer MIK, Fridlund B. Self-rated health among university students in relation to
- 4 sense of coherence and other personality traits. *Scandinavian Journal of Caring Sciences*. 1
- 5 déc 2003;17(4):347-57.
- 6
- 7 36. Waure C de, Soffiani V, Virdis A, Poscia A, Pietro MLD. Italian university students' self-
- 8 perceived health and satisfaction of life. *Annali dell'Istituto Superiore di Sanità*. juin
- 9 2015;51(2):121-5.
- 10
- 11 37. Rubin DB, Schenker N. Multiple imputation in health-care databases: An overview and some
- 12 applications. *Statist Med*. 1 avr 1991;10(4):585-98.
- 13
- 14 38. Schafer JL. *Analysis of Incomplete Multivariate Data*. CRC Press; 1997. 448 p.
- 15
- 16 39. Harter S. *The construction of the self: A developmental perspective*. New York, NY, US:
- 17 Guilford Press; 1999. (Distinguished contributions in psychology).
- 18
- 19 40. Jylhä M. What is self-rated health and why does it predict mortality? Towards a unified
- 20 conceptual model. *Soc Sci Med*. août 2009;69(3):307-16.
- 21
- 22 41. Schmidt M. Predictors of self-rated health and lifestyle behaviours in Swedish university
- 23 students. *Glob J Health Sci*. 15 mai 2012;4(4):1-14.
- 24
- 25 42. Cullati S, Rousseaux E, Gabadinho A, Courvoisier DS, Burton-Jeangros C. Factors of change
- 26 and cumulative factors in self-rated health trajectories: a systematic review. *Adv Life Course*
- 27 *Res*. mars 2014;19:14-27.
- 28
- 29 43. El Ansari W, Stock C. Explaining the gender difference in self-rated health among university
- 30 students in Egypt. *Women Health*. oct 2016;56(7):731-44.
- 31
- 32 44. Kling KC, Hyde JS, Showers CJ, Buswell BN. Gender differences in self-esteem: A meta-
- 33 analysis. *Psychological Bulletin*. 1999;125(4):470-500.
- 34
- 35
- 36
- 37
- 38
- 39
- 40
- 41
- 42
- 43
- 44
- 45
- 46
- 47
- 48
- 49
- 50
- 51
- 52
- 53
- 54
- 55
- 56
- 57
- 58
- 59
- 60

1  
2  
3 **Tables**  
4

5 **Table 1.** Characteristics of the study population concerning outcome (i.e. self-rated health), main  
6 exposure variable (i.e. self-esteem) and demographic data at Time 1: cohort enrolment, Time 2:  
7 optional mental health survey, Time 3: cohort follow-up in the i-Share Cohort, France, 2013-2016.  
8  
9  
10  
11 n=1011  
12  
13  
14

| Characteristics                                  | Participants<br>n=1011 |             |
|--------------------------------------------------|------------------------|-------------|
| <b>Outcome at Time 3</b>                         |                        |             |
| SRH 5-items, n (%)                               |                        |             |
| Very good                                        | 225                    | (22.3)      |
| Good                                             | 583                    | (57.7)      |
| Average                                          | 177                    | (17.5)      |
| Poor                                             | 26                     | (2.6)       |
| Very poor                                        | 0                      | (-)         |
| SRH dichotomized, n (%)                          |                        |             |
| Very good to good                                | 808                    | (79.9)      |
| Average to very poor                             | 203                    | (20.1)      |
| SRH in continuous <sup>a</sup> , median (IQR)    | 2.0                    | (2.0 ; 2.0) |
| <b>Main exposure at Time 2</b>                   |                        |             |
| Self-esteem in continuous variable, median (IQR) | 28                     | (25 ; 33)   |
| Self-esteem in categorical variable, n (%)       |                        |             |
| ≤25                                              | 287                    | (28.4)      |
| ]25-28]                                          | 219                    | (21.7)      |
| ]28-33]                                          | 277                    | (27.4)      |
| >=33                                             | 228                    | (22.6)      |
| <b>Demographic data</b>                          |                        |             |

1  
2  
3  
4  
5  
6  
7  
8  
9  
10  
11  
12  
13  
14  
15  
16  
17  
18  
19  
20  
21  
22  
23  
24  
25  
26  
27  
28  
29  
30  
31  
32  
33  
34  
35  
36  
37  
38  
39  
40  
41  
42  
43  
44  
45  
46  
47  
48  
49  
50  
51  
52  
53  
54  
55  
56  
57  
58  
59  
60

|                                            |      |        |
|--------------------------------------------|------|--------|
| Age at Time 3, mean (STD)                  | 20.8 | (2.3)  |
| Female, n (%)                              | 795  | (78.6) |
| BMI <25 Kg/m <sup>2</sup> at Time 1, n (%) | 909  | (89.9) |

*n: number of participants; IQR: Interquartile Range; STD: Standard deviation BMI: Body Mass*

*Index ; SRH: self-rated health*

*<sup>a</sup> 1=Very good, 2=Good, 3=Average, 4=Poor, 5=Very poor*

For peer review only



**Table 2.** Final logistic model of probability to declare good or very good compared to very poor, poor or average self-rated health after imputation of missing data on covariates. The i-Share Cohort, France, 2013-2016. n=1011

|                                      | Self-rated health <sup>a</sup> , n(%) or median<br>(IQR)                  |                          | Multivariate model |                |
|--------------------------------------|---------------------------------------------------------------------------|--------------------------|--------------------|----------------|
|                                      | Good / very good,<br>n=808                                                | Average / poor,<br>n=203 | aOR                | 95%CI          |
|                                      | Self-esteem (for the increase of one<br>standard deviation <sup>b</sup> ) | 29 (26-33)               | 26 (22-30)         | 1.40           |
| BMI at inclusion                     |                                                                           |                          |                    |                |
| <25 kg/m <sup>2</sup>                | 623 (89.6)                                                                | 130 (81.3)               | 2.11               | 1.26 ; 3.53*** |
| >=25                                 | 72 (10.4)                                                                 | 30 (18.8)                | 1                  | -              |
| Financial situation during childhood |                                                                           |                          |                    |                |
| Comfortable to very comfortable      | 487 (60.3)                                                                | 86 (42.4)                | 1.87               | 1.35 ; 2.59*** |
| Correct to very difficult            | 321 (39.7)                                                                | 117 (57.6)               | 1                  | -              |
| Personality                          |                                                                           |                          |                    |                |
| Persistence                          | 29 (24-31)                                                                | 29 (25-33)               | 0.94               | 0.91 ; 0.97*** |
| Harm avoidance                       | 26 (22-30)                                                                | 29 (25-33)               | 0.95               | 0.92 ; 0.98*** |
| Cooperativeness                      | 32 (29-35)                                                                | 32 (28-35)               | 1.04               | 1.01 ; 1.08**  |

*n*: number of participants; *IQR*: Interquartile Range; *BMI*: Body Mass Index; *OR*: Odds Ratio;

*95%CI*: 95% Confidence Interval

<sup>a</sup> Self-rated health description provided before data-imputation

<sup>b</sup> Self-esteem standard deviation: 5.696

\*p-value<0.25; \*\*p-value<0.05; \*\*\*p-value<0.01

**Table 3.** Sensitivity analysis of the effect of self-esteem on self-rated health. The i-Share Cohort, France, 2013-2016. n=1011

|                                                                               | Estimation <sup>a</sup> of increase of one standard deviation <sup>b</sup><br>for (1), (3) and (4) and natural scale for (2) of self-esteem effect on self-rated health |
|-------------------------------------------------------------------------------|-------------------------------------------------------------------------------------------------------------------------------------------------------------------------|
| <b>(1) modeling self-rated health</b>                                         |                                                                                                                                                                         |
| (a) in continuous variable (ranging from 1 to 5) <sup>c</sup>                 | $\beta=-0.05$ p=0.0005                                                                                                                                                  |
| (b) in three categories (with a “average” modality)                           |                                                                                                                                                                         |
| Average versus Poor/very poor                                                 | OR=1.69 p =0.0429                                                                                                                                                       |
| Good/very good versus Poor/very poor                                          | OR=2.23 p =0.0015                                                                                                                                                       |
| <b>(2) estimating self-esteem effect throughout a categorized variable</b>    |                                                                                                                                                                         |
| ]25-28] vs $\leq 25$                                                          | OR=1.25 p=0.3032                                                                                                                                                        |
| ]28-33] vs $\leq 25$                                                          | OR=2.28 p=0.0009                                                                                                                                                        |
| >33 vs $\leq 25$                                                              | OR=1.85 p=0.0301                                                                                                                                                        |
| <b>(3) completing adjustment</b>                                              |                                                                                                                                                                         |
| (a) with baseline self-rated health                                           | OR=1.29 p=0.0160                                                                                                                                                        |
| (b) forcing the adjustment with delays between the three measurement periods  | OR=1.40 p=0.0009                                                                                                                                                        |
| (c) with objective health indicator                                           | OR=1.40 p=0.0011                                                                                                                                                        |
| <b>(4) performing primary modeling among complete case population (n=665)</b> | OR=1.55 p=0.0009                                                                                                                                                        |

OR: Odds Ratio; p: p-value

<sup>a</sup> Models adjusted for Body Mass Index, financial situation during childhood, personality scores (persistence, harm avoidance, cooperativeness)

<sup>b</sup> Self-esteem standard deviation: 5.696

<sup>c</sup> High score represent better self-rated health

## Figures

**Figure 1.** Flow diagram showing participant flow through the study based on the i-Share Cohort, France, 2013-2016.

## Supplementary material

**Figure S1.** Timeline of data collection in I-Share

**Table S1.** Characteristics of the study population concerning educational, financial, social, geographical, follow up, behavioral and psychological data at Time 1: cohort enrolment, Time 2: optional mental health survey, Time 3: cohort follow-up in the i-Share Cohort, France, 2013-2016. n=1011

**Table S2.** Comparison of characteristics between the i-share population and the study sample. The i-Share Cohort, France, 2013-2016.

**Table S3.** Univariate and multivariate logistic model of probability to declare good or very good compared to very poor, poor or average self-rated health after imputation of missing data on covariates. The i-Share Cohort, France, 2013-2016. n=1011

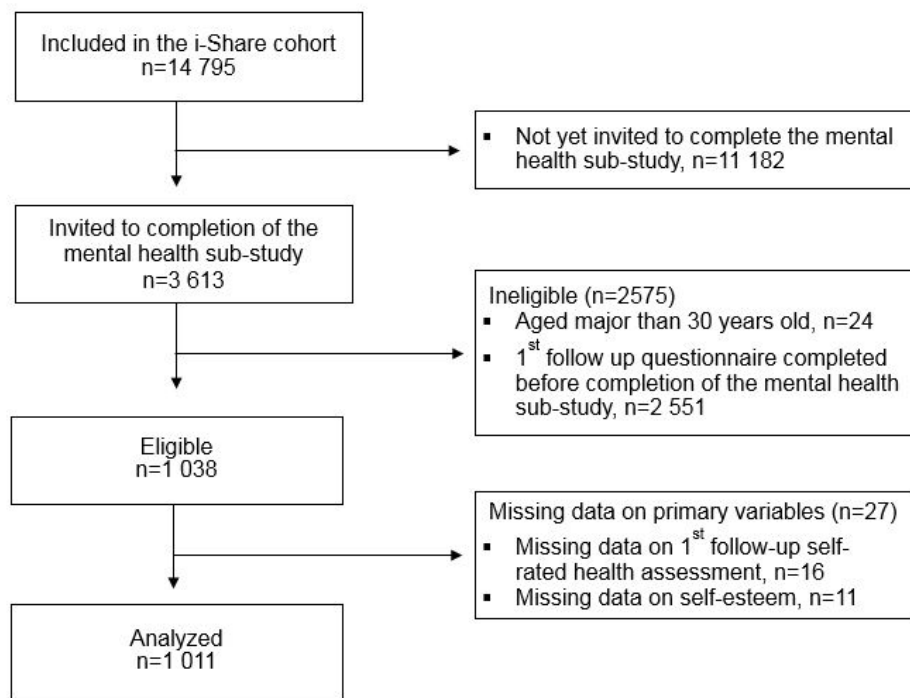

Figure 1. Flow diagram showing participant flow through the study based on the i-Share Cohort, France, 2013-2016.

187x134mm (96 x 96 DPI)

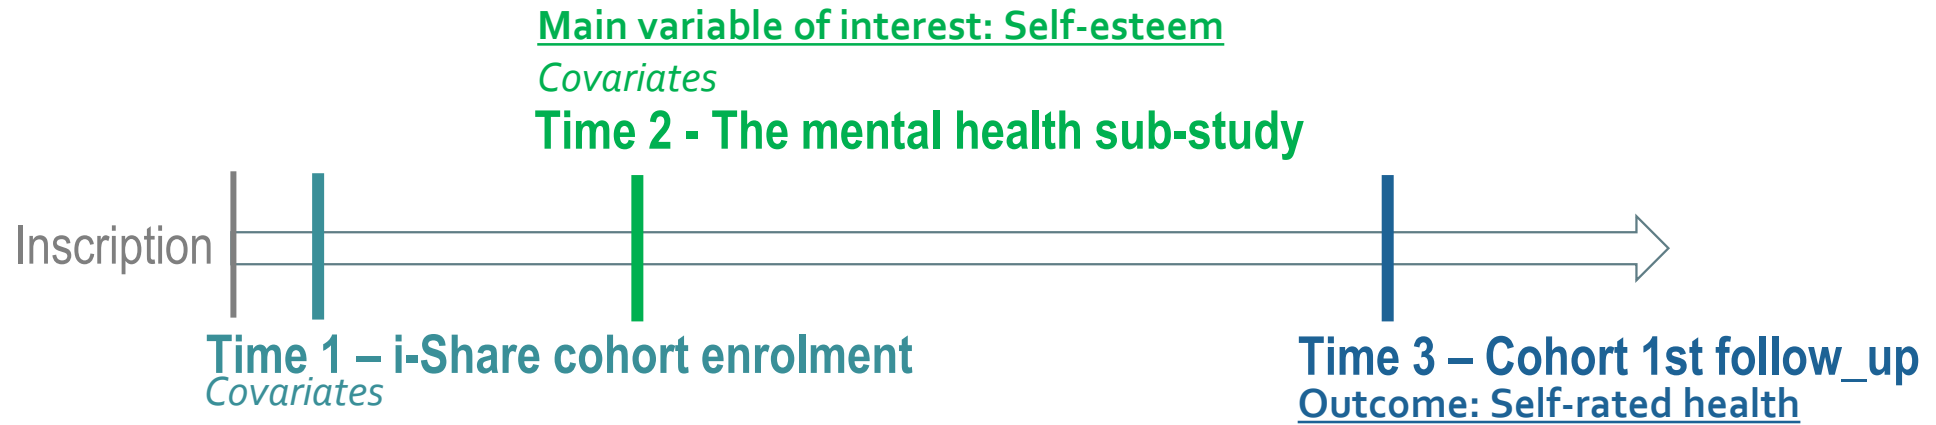

1  
2  
3  
4  
5  
6  
7  
8  
9  
10  
11  
12  
13  
14  
15  
16  
17  
18  
19  
20  
21  
22  
23  
24  
25  
26  
27  
28  
29  
30  
31  
32  
33  
34  
35  
36  
37  
38  
39  
40  
41

**Table S1.** Characteristics of the study population concerning educational, financial, social, geographical, follow up, behavioral and psychological data at Time 1: cohort enrolment, Time 2: optional mental health survey, Time 3: cohort follow-up in the i-Share Cohort, France, 2013-2016. n=1011

| Characteristics                                                                               | Participants<br>n=1011 |               |
|-----------------------------------------------------------------------------------------------|------------------------|---------------|
| <b>Educational data at Time 1, n (%)</b>                                                      |                        |               |
| University year                                                                               |                        |               |
| Freshman                                                                                      | 367                    | (36.5)        |
| Sophomore                                                                                     | 218                    | (21.7)        |
| Junior                                                                                        | 154                    | (15.3)        |
| Senior                                                                                        | 267                    | (26.5)        |
| At least one parent with high education level                                                 | 274                    | (28.5)        |
| <b>Financial data at Time 1, n (%)</b>                                                        |                        |               |
| Comfortable to very comfortable financial situation during childhood                          | 573                    | (56.7)        |
| Rather satisfied to very satisfied with financial resources                                   | 504                    | (49.8)        |
| <b>Social data at Time 1, n (%)</b>                                                           |                        |               |
| Cohabitation                                                                                  |                        |               |
| With parents                                                                                  | 278                    | (31.3)        |
| Flatsharing or couple                                                                         | 287                    | (32.4)        |
| No cohabitation / alone                                                                       | 322                    | (36.3)        |
| Strong familial support during childhood                                                      | 730                    | (72.9)        |
| <b>Geographical and follow-up data</b>                                                        |                        |               |
| City of the registration university at Time 1, n (%)                                          |                        |               |
| Bordeaux                                                                                      | 686                    | (67.9)        |
| Versailles                                                                                    | 77                     | (7.6)         |
| Nice                                                                                          | 22                     | (2.2)         |
| Paris                                                                                         | 45                     | (4.5)         |
| Other                                                                                         | 181                    | (17.9)        |
| Delay in months between inclusion and SRH assessment (follow-up), median (IQR)                | 13.2                   | (12.3 ; 23.4) |
| Delay in months between mental health assessment and SRH assessment (follow-up), median (IQR) | 8.4                    | (3.2 ; 12.0)  |
| <b>Behavioral data at Time 1</b>                                                              |                        |               |
| Tobacco consumption, n (%)                                                                    |                        |               |
| None                                                                                          | 761                    | (75.3)        |
| <=10 cigarettes                                                                               | 213                    | (21.1)        |
| >10 cigarettes                                                                                | 37                     | (3.66)        |
| Alcohol consumption frequency during evening, n (%) (MD=40/1)                                 |                        |               |
| Never                                                                                         | 22                     | (2.3)         |
| Rarely                                                                                        | 225                    | (23.2)        |
| Occasionally                                                                                  | 393                    | (40.5)        |
| Frequently                                                                                    | 330                    | (34.0)        |
| Psychoactive substance consumption at least once in life, n (%)                               | 603                    | (59.6)        |
| BMI <25 Kg/m <sup>2</sup> at Time 1, n (%)                                                    | 909                    | (89.9)        |
| Accordance with nutritional French recommendations, median (IQR)                              | 3                      | (3 ; 4)       |
| Physical activity, n (%)                                                                      |                        |               |
| Less than 25 min/day                                                                          | 109                    | (10.9)        |
| Between 25 and 35 min/day                                                                     | 183                    | (18.3)        |
| More than 35 min/day                                                                          | 706                    | (70.7)        |
| <b>Psychological data at Time 2, median (IQR)</b>                                             |                        |               |
| Coping - Social support                                                                       | 11                     | (8 ; 14)      |
| Coping - Emotional                                                                            | 20                     | (17 ; 22)     |
| Coping - Festive-addictive                                                                    | 11                     | (9 ; 14)      |

|    |                                 |      |           |
|----|---------------------------------|------|-----------|
| 1  |                                 |      |           |
| 2  |                                 |      |           |
| 3  | Impulsivity                     | 61   | (56 ; 67) |
| 4  | Aggressiveness                  | 1    | (0 ; 3)   |
| 5  | Personality - Novelty seeking   | 20.5 | (18 ; 23) |
| 6  | Personality - Persistence       | 28   | (24 ; 31) |
| 7  | Personality - Harm avoidance    | 27   | (22 ; 31) |
| 8  | Personality - Determination     | 27   | (23 ; 31) |
| 9  | Personality - Reward dependence | 28   | (23 ; 32) |
| 10 | Personality - Cooperativeness   | 32   | (29 ; 35) |

*n*: number of participants; *IQR*: Interquartile Range; *BMI*: Body Mass Index ; *SRH*: self-rated health

For peer review only

**Table S2.** Comparison of characteristics between the i-share population and the study sample. The i-Share Cohort, France, 2013-2016.

|                                                        | <b>i-Share population (&lt; 30 years)and without<br/>missing data on self-rated health<br/>n=11 925</b> |                 | <b>Study sample<br/>n=1 011</b> |                 |
|--------------------------------------------------------|---------------------------------------------------------------------------------------------------------|-----------------|---------------------------------|-----------------|
| <b>Baseline self-rated health, n<br/>(%)</b>           |                                                                                                         |                 |                                 |                 |
| Very good                                              | 2596                                                                                                    | (21.77)         | (226)                           | (22.35)         |
| Good                                                   | 6810                                                                                                    | (57.11)         | (602)                           | (59.55)         |
| Medium                                                 | 2183                                                                                                    | (18.31)         | (158)                           | (15.63)         |
| Bad                                                    | 302                                                                                                     | (2.53)          | (22)                            | (2.18)          |
| Very bad                                               | 34                                                                                                      | (0.29)          | (3)                             | (0.30)          |
| <b>Sex, n (%)</b>                                      |                                                                                                         |                 |                                 |                 |
| Male                                                   | 3036                                                                                                    | (25.46)         | (216)                           | (21.36)         |
| Female                                                 | 8889                                                                                                    | (74.54)         | (795)                           | (78.64)         |
| <b>Familial support, n (%)</b>                         |                                                                                                         |                 |                                 |                 |
| DM                                                     | 212                                                                                                     |                 | (9)                             |                 |
| Low                                                    | 3322                                                                                                    | (28.36)         | (272)                           | (27.15)         |
| High                                                   | 8391                                                                                                    | (71.64)         | (730)                           | (72.85)         |
| <b>Financial situation during<br/>childhood, n (%)</b> |                                                                                                         |                 |                                 |                 |
| Comfortable to very<br>comfortable                     | 6369                                                                                                    | (53.41)         | (573)                           | (56.68)         |
| Correct to very difficult                              | 5556                                                                                                    | (46.59)         | (438)                           | (43.32)         |
| <b>BMI, median (Q1 ; Q3)</b>                           | 21.39                                                                                                   | (19.84 ; 23.44) | 21.33                           | (19.88 ; 23.15) |



**Table S3.** Univariate and multivariate logistic model of probability to declare good or very good compared to very poor, poor or average self-rated health after imputation of missing data on covariates. The i-Share Cohort, France, 2013-2016. n=1011

|                                                                                               | Univariate model |                | Multivariate model |                |
|-----------------------------------------------------------------------------------------------|------------------|----------------|--------------------|----------------|
|                                                                                               | OR               | 95% CI         | aOR                | 95% CI         |
| <b>MAIN EXPOSURE</b>                                                                          |                  |                |                    |                |
| Self-esteem (for the increase of one standard deviation <sup>b</sup> )                        | 1.70             | 1.44 ; 1.99*** | 1.40               | 1.15 ; 1.72*** |
| <b>COVARIATES</b>                                                                             |                  |                |                    |                |
| <b>Demographic data</b>                                                                       |                  |                |                    |                |
| Gender                                                                                        |                  |                |                    |                |
| Male                                                                                          | 1                | -              |                    |                |
| Female                                                                                        | 0.48             | 0.31 ; 0.74*** |                    |                |
| Age at self-rated health assessment (follow-up)                                               | 0.98             | 0.92 ; 1.04    |                    |                |
| <b>Educational data</b>                                                                       |                  |                |                    |                |
| University year at inclusion                                                                  |                  | *              |                    |                |
| 1 <sup>st</sup> year / freshman                                                               | 1                | -              |                    |                |
| 2 <sup>nd</sup> year / sophomore                                                              | 1.54             | 1.00 ; 2.37    |                    |                |
| 3 <sup>rd</sup> year / junior                                                                 | 1.60             | 0.98 ; 2.62    |                    |                |
| 4 <sup>th</sup> year or more / senior                                                         | 1.22             | 0.83 ; 1.80    |                    |                |
| Parents' education level                                                                      |                  |                |                    |                |
| At least one with high level                                                                  | 1                | -              |                    |                |
| Both with low level or only one given with low level                                          | 0.86             | 0.60 ; 1.22    |                    |                |
| <b>Financial data</b>                                                                         |                  |                |                    |                |
| Financial situation during childhood                                                          |                  |                |                    |                |
| Comfortable to very comfortable                                                               | 1                | -              | 1                  | -              |
| Correct to very difficult                                                                     | 0.48             | 0.36 ; 0.66*** | 0.54               | 0.39 ; 0.74*** |
| Satisfaction with financial resources at inclusion                                            |                  |                |                    |                |
| Rather satisfied to very satisfied                                                            | 1                | -              |                    |                |
| Completely dissatisfied to satisfied                                                          | 0.55             | 0.40 ; 0.75*** |                    |                |
| <b>Social data</b>                                                                            |                  |                |                    |                |
| Cohabitation at inclusion                                                                     |                  |                |                    |                |
| No cohabitation                                                                               | 1                | -              |                    |                |
| With parents                                                                                  | 1.03             | 0.70 ; 1.51    |                    |                |
| Flat sharing or couple                                                                        | 1.12             | 0.76 ; 1.64    |                    |                |
| Familial support during childhood                                                             |                  |                |                    |                |
| Strong                                                                                        | 1                | -              |                    |                |
| Weak                                                                                          | 0.56             | 0.40 ; 0.78*** |                    |                |
| <b>Geographical and follow-up data</b>                                                        |                  |                |                    |                |
| City of the registration university                                                           |                  |                |                    |                |
| Bordeaux                                                                                      | 1                | -              |                    |                |
| Versailles                                                                                    | 1.16             | 0.63 ; 2.14    |                    |                |
| Nice                                                                                          | 1.16             | 0.39 ; 3.49    |                    |                |
| Paris                                                                                         | 1.04             | 0.49 ; 2.20    |                    |                |
| Other                                                                                         | 1.08             | 0.71 ; 1.63    |                    |                |
| Delay in months between inclusion and self-rated health assessment (follow-up)                | 1.00             | 0.97 ; 1.03    |                    |                |
| Delay in months between mental health assessment and self-rated health assessment (follow-up) | 1.00             | 0.98 ; 1.02    |                    |                |
| <b>Behavioral data</b>                                                                        |                  |                |                    |                |
| Tobacco consumption at inclusion                                                              |                  |                |                    |                |
| None                                                                                          | 1                | -              |                    |                |
| <=10 cigarettes                                                                               | 0.97             | 0.66 ; 1.42    |                    |                |

1  
2  
3  
4  
5  
6  
7  
8  
9  
10  
11  
12  
13  
14  
15  
16  
17  
18  
19  
20  
21  
22  
23  
24  
25  
26  
27  
28  
29  
30  
31  
32  
33  
34  
35  
36  
37  
38  
39  
40  
41  
42  
43  
44  
45  
46  
47  
48  
49  
50  
51  
52  
53  
54  
55  
56  
57  
58  
59  
60

|                                                           |      |                |      |                |
|-----------------------------------------------------------|------|----------------|------|----------------|
| >10 cigarettes                                            | 0.66 | 0.31 ; 1.40    |      |                |
| Alcohol consumption frequency during evening at inclusion |      | **             |      |                |
| Never drink                                               | 1    | -              |      |                |
| Never binge                                               | 1.09 | 0.41 ; 2.91    |      |                |
| Occasionally binge                                        | 1.53 | 0.58 ; 4.05    |      |                |
| Frequently binge                                          | 1.99 | 0.75 ; 5.33    |      |                |
| Psychoactive substance consumption                        |      |                |      |                |
| Never                                                     | 1    | -              |      |                |
| Once in life                                              | 1.26 | 0.92 ; 1.72*   |      |                |
| BMI at inclusion                                          |      |                |      |                |
| <25 kg/m <sup>2</sup>                                     | 1    | -              | 1    | -              |
| >=25                                                      | 0.52 | 0.33 ; 0.81*** | 0.50 | 0.31 ; 0.80*** |
| Accordance with nutritional French recommendations        | 0.97 | 0.85 ; 1.10    |      |                |
| Physical activity                                         |      |                |      |                |
| More than 35 min/day                                      | 1    | -              |      |                |
| Less than 25 min/day                                      | 0.89 | 0.54 ; 1.44    |      |                |
| Between 25 and 35 min/day                                 | 1.01 | 0.67 ; 1.52    |      |                |
| <b>Psychological data</b>                                 |      |                |      |                |
| Coping                                                    |      |                |      |                |
| Social support                                            | 1.03 | 0.99 ; 1.08*   |      |                |
| Emotional                                                 | 0.93 | 0.90 ; 0.97*** |      |                |
| Festive-addictive                                         | 1.04 | 1.00 ; 1.09*   |      |                |
| Impulsivity                                               | 0.99 | 0.97 ; 1.01*   |      |                |
| Agressiveness                                             | 0.95 | 0.90 ; 1.00**  |      |                |
| Personality                                               |      |                |      |                |
| Novelty seeking                                           | 1.02 | 1.00 ; 1.06*   |      |                |
| Persistence                                               | 0.95 | 0.92 ; 0.97*** | 0.94 | 0.91 ; 0.97*** |
| Harm avoidance                                            | 0.91 | 0.89 ; 0.94*** | 0.95 | 0.92 ; 0.98*** |
| Determination                                             | 1.07 | 1.04 ; 1.10*** |      |                |
| Reward dependence                                         | 1.03 | 1.01 ; 1.06**  |      |                |
| Cooperativeness                                           | 1.04 | 1.01 ; 1.08*** | 1.04 | 1.01 ; 1.08**  |

*n*: number of participants; *IQR*: Interquartile Range; *BMI*: Body Mass Index; *OR*: Odds Ratio; *95%CI*: 95% Confidence Interval

<sup>a</sup> Self-rated health description provided before data-imputation

<sup>b</sup> Self-esteem standard deviation: 5.696

\*p-value<0.25; \*\*p-value<0.05; \*\*\*p-value<0.01

**STROBE 2007 (v4) checklist of items to be included in reports of observational studies in epidemiology\***  
**Checklist for cohort, case-control, and cross-sectional studies (combined)**

| Section/Topic             | Item # | Recommendation                                                                                                                                                                                                                                                                                                                                                                                                                                                         | Reported on page # |
|---------------------------|--------|------------------------------------------------------------------------------------------------------------------------------------------------------------------------------------------------------------------------------------------------------------------------------------------------------------------------------------------------------------------------------------------------------------------------------------------------------------------------|--------------------|
| Title and abstract        | 1      | (a) Indicate the study's design with a commonly used term in the title or the abstract                                                                                                                                                                                                                                                                                                                                                                                 | 1,3                |
|                           |        | (b) Provide in the abstract an informative and balanced summary of what was done and what was found                                                                                                                                                                                                                                                                                                                                                                    | 3                  |
| <b>Introduction</b>       |        |                                                                                                                                                                                                                                                                                                                                                                                                                                                                        |                    |
| Background/rationale      | 2      | Explain the scientific background and rationale for the investigation being reported                                                                                                                                                                                                                                                                                                                                                                                   | 5,6                |
| Objectives                | 3      | State specific objectives, including any pre-specified hypotheses                                                                                                                                                                                                                                                                                                                                                                                                      | 6                  |
| <b>Methods</b>            |        |                                                                                                                                                                                                                                                                                                                                                                                                                                                                        |                    |
| Study design              | 4      | Present key elements of study design early in the paper                                                                                                                                                                                                                                                                                                                                                                                                                | 7                  |
| Setting                   | 5      | Describe the setting, locations, and relevant dates, including periods of recruitment, exposure, follow-up, and data collection                                                                                                                                                                                                                                                                                                                                        | 6,7                |
| Participants              | 6      | (a) <i>Cohort study</i> —Give the eligibility criteria, and the sources and methods of selection of participants. Describe methods of follow-up<br><i>Case-control study</i> —Give the eligibility criteria, and the sources and methods of case ascertainment and control selection. Give the rationale for the choice of cases and controls<br><i>Cross-sectional study</i> —Give the eligibility criteria, and the sources and methods of selection of participants | 6,7                |
|                           |        | (b) <i>Cohort study</i> —For matched studies, give matching criteria and number of exposed and unexposed<br><i>Case-control study</i> —For matched studies, give matching criteria and the number of controls per case                                                                                                                                                                                                                                                 | NA                 |
| Variables                 | 7      | Clearly define all outcomes, exposures, predictors, potential confounders, and effect modifiers. Give diagnostic criteria, if applicable                                                                                                                                                                                                                                                                                                                               | 7,8,9,10           |
| Data sources/ measurement | 8*     | For each variable of interest, give sources of data and details of methods of assessment (measurement). Describe comparability of assessment methods if there is more than one group                                                                                                                                                                                                                                                                                   | 7,8,9,10           |
| Bias                      | 9      | Describe any efforts to address potential sources of bias                                                                                                                                                                                                                                                                                                                                                                                                              | 8,10,11            |
| Study size                | 10     | Explain how the study size was arrived at                                                                                                                                                                                                                                                                                                                                                                                                                              | 10                 |
| Quantitative variables    | 11     | Explain how quantitative variables were handled in the analyses. If applicable, describe which groupings were chosen and why                                                                                                                                                                                                                                                                                                                                           | 7,8,9,10           |
| Statistical methods       | 12     | (a) Describe all statistical methods, including those used to control for confounding                                                                                                                                                                                                                                                                                                                                                                                  | 10,11              |
|                           |        | (b) Describe any methods used to examine subgroups and interactions                                                                                                                                                                                                                                                                                                                                                                                                    | 10,11              |
|                           |        | (c) Explain how missing data were addressed                                                                                                                                                                                                                                                                                                                                                                                                                            | 11                 |
|                           |        | (d) <i>Cohort study</i> —If applicable, explain how loss to follow-up was addressed<br><i>Case-control study</i> —If applicable, explain how matching of cases and controls was addressed<br><i>Cross-sectional study</i> —If applicable, describe analytical methods taking account of sampling strategy                                                                                                                                                              | 14                 |
|                           |        | (e) Describe any sensitivity analyses                                                                                                                                                                                                                                                                                                                                                                                                                                  | 11                 |
| <b>Results</b>            |        |                                                                                                                                                                                                                                                                                                                                                                                                                                                                        |                    |
| Participants              | 13*    | (a) Report numbers of individuals at each stage of study—eg numbers potentially eligible, examined for eligibility, confirmed eligible, included in the study, completing follow-up, and analysed                                                                                                                                                                                                                                                                      | 11,12              |
|                           |        | (b) Give reasons for non-participation at each stage                                                                                                                                                                                                                                                                                                                                                                                                                   | Figure 1           |

|                          |     |                                                                                                                                                                                                              |                             |
|--------------------------|-----|--------------------------------------------------------------------------------------------------------------------------------------------------------------------------------------------------------------|-----------------------------|
|                          |     | (c) Consider use of a flow diagram                                                                                                                                                                           | Figure 1                    |
| Descriptive data         | 14* | (a) Give characteristics of study participants (eg demographic, clinical, social) and information on exposures and potential confounders                                                                     | 12 + Table 1 + Table 1 supp |
|                          |     | (b) Indicate number of participants with missing data for each variable of interest                                                                                                                          | 12                          |
|                          |     | (c) <i>Cohort study</i> —Summarise follow-up time (eg, average and total amount)                                                                                                                             | 12                          |
| Outcome data             | 15* | <i>Cohort study</i> —Report numbers of outcome events or summary measures over time                                                                                                                          | 12 + Table 1                |
|                          |     | <i>Case-control study</i> —Report numbers in each exposure category, or summary measures of exposure                                                                                                         |                             |
|                          |     | <i>Cross-sectional study</i> —Report numbers of outcome events or summary measures                                                                                                                           |                             |
| Main results             | 16  | (a) Give unadjusted estimates and, if applicable, confounder-adjusted estimates and their precision (eg, 95% confidence interval). Make clear which confounders were adjusted for and why they were included | 12 + Table 2                |
|                          |     | (b) Report category boundaries when continuous variables were categorized                                                                                                                                    |                             |
|                          |     | (c) If relevant, consider translating estimates of relative risk into absolute risk for a meaningful time period                                                                                             |                             |
| Other analyses           | 17  | Report other analyses done—eg analyses of subgroups and interactions, and sensitivity analyses                                                                                                               | 13 + Table 3                |
| <b>Discussion</b>        |     |                                                                                                                                                                                                              |                             |
| Key results              | 18  | Summarise key results with reference to study objectives                                                                                                                                                     | 13                          |
| Limitations              | 19  | Discuss limitations of the study, taking into account sources of potential bias or imprecision. Discuss both direction and magnitude of any potential bias                                                   | 14                          |
| Interpretation           | 20  | Give a cautious overall interpretation of results considering objectives, limitations, multiplicity of analyses, results from similar studies, and other relevant evidence                                   | 13,14                       |
| Generalisability         | 21  | Discuss the generalisability (external validity) of the study results                                                                                                                                        | 15                          |
| <b>Other information</b> |     |                                                                                                                                                                                                              |                             |
| Funding                  | 22  | Give the source of funding and the role of the funders for the present study and, if applicable, for the original study on which the present article is based                                                | 16                          |

\*Give information separately for cases and controls in case-control studies and, if applicable, for exposed and unexposed groups in cohort and cross-sectional studies.

**Note:** An Explanation and Elaboration article discusses each checklist item and gives methodological background and published examples of transparent reporting. The STROBE checklist is best used in conjunction with this article (freely available on the Web sites of PLoS Medicine at <http://www.plosmedicine.org/>, Annals of Internal Medicine at <http://www.annals.org/>, and Epidemiology at <http://www.epidem.com/>). Information on the STROBE Initiative is available at [www.strobe-statement.org](http://www.strobe-statement.org).

# BMJ Open

## Is self-esteem associated with self-rated health among French college students? A longitudinal epidemiological study, the i-Share cohort

|                                 |                                                                                                                                                                                                                                                                                                                                                                                                                                                                                                                                                                                                                                                                                    |
|---------------------------------|------------------------------------------------------------------------------------------------------------------------------------------------------------------------------------------------------------------------------------------------------------------------------------------------------------------------------------------------------------------------------------------------------------------------------------------------------------------------------------------------------------------------------------------------------------------------------------------------------------------------------------------------------------------------------------|
| Journal:                        | <i>BMJ Open</i>                                                                                                                                                                                                                                                                                                                                                                                                                                                                                                                                                                                                                                                                    |
| Manuscript ID                   | bmjopen-2018-024500.R2                                                                                                                                                                                                                                                                                                                                                                                                                                                                                                                                                                                                                                                             |
| Article Type:                   | Research                                                                                                                                                                                                                                                                                                                                                                                                                                                                                                                                                                                                                                                                           |
| Date Submitted by the Author:   | 27-Mar-2019                                                                                                                                                                                                                                                                                                                                                                                                                                                                                                                                                                                                                                                                        |
| Complete List of Authors:       | Arsandaux, Julie; Univ. Bordeaux, Inserm, Bordeaux Population Health Research Center, team HEALTHY, UMR 1219, F-33000<br>Michel, Grégory; Univ. Bordeaux, Inserm, Bordeaux Population Health Research Center, team HEALTHY, UMR 1219, F-33000<br>Tournier, Marie; Univ. Bordeaux, Inserm, Bordeaux Population Health Research Center, team HEALTHY, UMR 1219, F-33000 ; Centre Hospitalier Perrens<br>Tzourio, Christophe; Univ. Bordeaux, Inserm, Bordeaux Population Health Research Center, team HEALTHY, UMR 1219, F-33000<br>Galéra, Cédric; Univ. Bordeaux, Inserm, Bordeaux Population Health Research Center, team HEALTHY, UMR 1219, F-33000 ; Centre Hospitalier Perrens |
| <b>Primary Subject Heading</b>: | Public health                                                                                                                                                                                                                                                                                                                                                                                                                                                                                                                                                                                                                                                                      |
| Secondary Subject Heading:      | Epidemiology, Mental health                                                                                                                                                                                                                                                                                                                                                                                                                                                                                                                                                                                                                                                        |
| Keywords:                       | self-esteem, self-rated health, psychological determinants, students, cohort study                                                                                                                                                                                                                                                                                                                                                                                                                                                                                                                                                                                                 |
|                                 |                                                                                                                                                                                                                                                                                                                                                                                                                                                                                                                                                                                                                                                                                    |

SCHOLARONE™  
Manuscripts

1  
2  
3 **Is self-esteem associated with self-rated health among**  
4  
5  
6 **French college students? A longitudinal epidemiological**  
7  
8  
9  
10 **study, the i-Share cohort**  
11  
12

13  
14 Julie Arsandaux, Msc\*<sup>a</sup>, Grégory Michel, Ph.D<sup>a</sup>, Marie Tournier, M.D, Ph.D<sup>a,b</sup>, Christophe  
15  
16 Tzourio, M.D, Ph.D <sup>a</sup> and Cédric Galéra, M.D, Ph.D <sup>a,b</sup>  
17  
18

19  
20  
21  
22 <sup>a</sup> Univ. Bordeaux, Inserm, Bordeaux Population Health Research Center, team HEALTHY,  
23  
24 UMR 1219, F-33000 Bordeaux, France.  
25  
26

27  
28 <sup>b</sup> Centre Hospitalier Perrens, Bordeaux, France.  
29  
30

31  
32  
33 **Corresponding Author:** Julie Arsandaux  
34

35 Postal address:

36  
37 Université de Bordeaux, ISPED

38  
39 146, rue Léo Saignat – CS61292

40  
41 33076 Bordeaux cedex, FRANCE

42  
43 Tel: +33 (0) 689626100 or Tél: + 33 (0) 5 57 57 16 59/ Fax: + 33 (0) 5 47 30 42 09  
44

45  
46 E-mail: julie.arsandaux@u-bordeaux.fr  
47  
48  
49

50  
51 Word count (exc. figures/tables): 3513  
52  
53  
54  
55  
56  
57  
58  
59  
60

## ABBREVIATIONS

95%CI: 95% Confidence Interval

BMI: Body Mass Index

IQR: Interquartile range

MICE: Multivariate Imputation by Chained Equations

OR: Odds Ratio

p: p-value

For peer review only

## ABSTRACT

**Objectives:** The aim of the study was to estimate the association between self-esteem and subsequent self-rated health during college years, taking into account a wide range of potential confounders.

**Design:** Prospective longitudinal study.

**Setting:** The French i-Share cohort.

**Participants:** The sample consisted of 1011 college students.

**Primary and secondary outcome measures:** The association between self-esteem and later self-rated health was evaluated using multivariate modeling.

Data regarding self-rated health, global self-esteem and demographic, educational, social, behavioral, environmental and financial characteristics were collected through an internet-based questionnaire.

**Results:** The 1011 participants had a median age of 21.9 years and 79% (795/1011) were females.

Self-rated health was assessed a median of 8 months after the self-esteem measurement. Twenty percent of the students declared average to very poor health (203/1011). Students with higher levels of self-esteem were more likely to declare good or very good self-rated health (adjusted odds ratio=1.40, 95% confidence interval [1.15-1.72], p-value=0.001). Other factors associated with good or very good self-rated health were low body mass index, a comfortable financial situation during childhood and three personality traits (low persistence and harm avoidance and high cooperativeness).

**Conclusions:** This study offers novel findings on the impact of self-esteem on self-rated health among college students. Interventions targeting self-esteem should be experimented during university years in order to improve health outcomes.

**Keywords:** self-esteem; self-rated health; psychological determinants; students; cohort study



## ARTICLE SUMMARY

### Strengths and limitations of this study

- The present study is based on a prospective design with a large number of participants
- A broad adjustment was made for confounders to estimate unbiased association
- This study investigates self-rated health among college students, a population that has received less attention in the literature
- Participants were volunteers in the i-Share project which may have caused a sampling bias. Extrapolation to other student populations may be limited.
- Reverse causation between self-esteem and self-rated health may exist and could not be investigated with our design.

### AUTHORS' CONTRIBUTIONS

J. Arsandaux and C. Galera developed the study concept and study design. C. Tzourio is the principal investigator of the i-Share Cohort. M. Tournier and G. Michel participated actively in the creation of the mental health questionnaire and brought psychological and psychiatric expertise to the interpretation of the results. J. Arsandaux performed the data analysis and interpretation under the supervision of C. Galera. J. Arsandaux drafted the manuscript and all the co-authors provided critical revisions. All the authors approved the final version of the manuscript for submission.

### DATA AVAILABILITY

The scientific committee of the i-share cohort can be contacted for deidentified participant data transfers.

## INTRODUCTION

Self-rated health is considered to be a relevant indicator of general health. The high validity, reliability and predictive power of self-rated health make it one of the best predictors of objective health problems (including mortality) and health care utilization (1–6). Collection of self-rated health is recommended by the World Health Organization (WHO) as a standard and cost-effective measure in health surveys (7–10).

Associations between self-rated health and mortality persist even after objective health adjustment, suggesting that self-rated health could constitute an inclusive and universal predictor alongside clinical examination, medical records or self-reports of medical conditions (11).

Determinants of self-rated health problems have attracted interdisciplinary interest. Several studies have investigated demographic, educational, social, behavioral, environmental and financial determinants (12). In addition, a few studies have emphasized the associations between psychosocial resources and self-rated health assessment (13,14). However, there are important limitations in the literature which should be underlined.

First, despite recent research, psychosocial resources have been insufficiently investigated in the literature (14). Among individual characteristics, the impact of self-esteem (i.e. the overall aggregated opinion of oneself at any one time, as defined by Rosenberg) on the rating of one's health remains poorly understood. Yet, it should be noted that self-esteem is a potentially modifiable factor. If self-esteem is predictive of self-rated health independently of other psychosocial confounders, it could represent a specific target for preventive interventions aimed at improving general health. To our knowledge, only two studies have estimated the association between self-esteem and self-rated health, and none among college students (15,1). These studies have reported a significant relationship supporting the hypothesis that high self-esteem is associated with better self-rated health. In addition, a number of studies have evidenced associations between self-esteem and several important health-

1  
2  
3 related outcomes: academic success, well-being and internalized/externalized mental health problems  
4  
5 (16,17).  
6  
7

8 Second, the population of college students has received little attention in this specific domain. Yet this  
9  
10 period corresponding to the transition between adolescence and adulthood is crucial for the  
11  
12 development of individuals, as well as for constructing and reinforcing self-esteem. Although the  
13  
14 student population is in relatively good health, it is noteworthy that mental health and substance use  
15  
16 issues are prevalent during the college years (18–20). On the one hand, self-rated health can serve to  
17  
18 evaluate a general health status predicting future health problems before they set in. On the other hand,  
19  
20 college is a period of development in which interventions could modify the onset of determinants such  
21  
22 as psychosocial resources.  
23  
24

25 A final limitation is the lack of studies that adjust comprehensively for various risk factors (i.e. the six  
26  
27 domains reported above). This implies possible confounding biases that need to be addressed.  
28  
29

30 The aim of the present study was to estimate the association between self-esteem and subsequent self-  
31  
32 rated health during college years, taking into account a wide range of potential confounders in the i-  
33  
34 Share cohort.  
35  
36  
37  
38  
39

## 40 **METHODS**

### 41 *Study population*

42  
43  
44 This study is based on the internet-based Students Health Research Enterprise (i-Share, www.i-  
45  
46 share.fr) project, a prospective population-based cohort study of students in higher education  
47  
48 institutions in France. The i-Share cohort is one of the largest epidemiological studies conducted on  
49  
50 European students and constitutes an opportunity to investigate this research question thanks to its  
51  
52 longitudinal collection of multidimensional data on childhood and family history, lifestyle, health  
53  
54 information, living conditions and mental and psychosocial examinations(21,22). The objectives of the  
55  
56  
57  
58  
59  
60

1  
2  
3 i-Share cohort are to evaluate important health aspects among university students over the course of 10  
4 years. The eligibility criteria are to be officially enrolled at a university or higher education institution;  
5 to be at least 18 years of age; to be able to read and understand French; and to provide informed  
6 consent for participation. Recruitment started in February 2013 and is still ongoing. Students are  
7 informed about the objectives of the study through promotion campaigns. In particular, a group of  
8 trained students inform their peers about the study and initiate the online recruitment process. The  
9 baseline inquiry collected information on students' health, personal and family medical histories,  
10 socio-demographic characteristics, and lifestyle habits. Afterwards, students receive an e-mail  
11 invitation to complete follow-up questionnaires annually (on each anniversary of the date of the  
12 baseline questionnaire) for 10 years and for sub-study data collection. As of February 6, 2016, 14 795  
13 participants were included in the cohort, with the average age being 21 years and 74% were female.  
14 The response rate for one-year follow-up was 18% (n=2607). Since December 2015, an optional  
15 mental health survey has been conducted to provide data on several dimensions of mental and  
16 psychological health. For this specific study, we used the data available as of April 29th, 2016. We  
17 used a longitudinal design to compare self-esteem data collected during the mental health sub-study  
18 (Time 2) with the next planned assessment of self-rated health (i.e. during the 1<sup>st</sup> follow-up of the  
19 cohort, Time 3). We used baseline characteristics collected at cohort inclusion for adjustment (Time  
20 1). Figure S1 in the supplementary material describes the study timeline. Only college students aged  
21 between 18 and 30 years old and participating in the mental health sub-study before their 1<sup>st</sup> follow-up  
22 were included. The i-Share project on which this study was based was approved by the Commission  
23 Nationale de l'Informatique et des Libertés (CNIL) [DR-2013-019].

### 24 ***'Patient and Public Involvement'***

25 No participants were involved in setting the research questions or measurements, or in developing  
26 plans for the design of the study. No participants were asked to advise on the interpretation or writing  
27 up of results. However, there are plans to disseminate the results of the research to study participants  
28 via the i-share website and social media and by means of a quarterly newsletter sent to participants via  
29  
30  
31  
32  
33  
34  
35  
36  
37  
38  
39  
40  
41  
42  
43  
44  
45  
46  
47  
48  
49  
50  
51  
52  
53  
54  
55  
56  
57  
58  
59  
60

1  
2  
3 email. A group of trained students also participated during the recruitment process (i.e. informed their  
4 peers about the study and initiated the online recruitment process). These students were also involved  
5 in the communication campaign, advising the study team about priority messages and communication  
6 tools.  
7  
8  
9

## 10 11 12 ***Measures and scales***

### 13 14 15 *Outcome: Self-rated health*

16  
17 Students gauged their current general self-rated health by the question: “Do you consider your current  
18 health?” with a five-point response scale ranging from 1 to 5 (1=“Very poor” / 2=“Poor” /  
19 3=“Average” / 4=“Good” / 5=“Very good”). The variable was dichotomized as follows: “Very good /  
20 Good” versus “Average / Poor / Very poor”. Psychometric performance of this assessment has been  
21 reported in two papers (8,9). Self-rated health was measured at inclusion of the participant and in  
22 follow-up questionnaires. The 1<sup>st</sup> follow-up self-rated health measure corresponded to the primary  
23 outcome of this study (Time 3).  
24  
25  
26  
27  
28  
29  
30  
31

### 32 33 *Main variable of interest: Self-esteem*

34  
35 Self-esteem was assessed using the Self-Esteem Scale (Rosenberg, 1965), a 10-item self-report  
36 measure of global self-esteem. Each item is answered on a 4-point Likert type scale ranging from  
37 1=“Strongly disagree” to 4=“Strongly agree”. The score can range from 10 (low level of self-esteem)  
38 to 40 (high level of self-esteem). The Rosenberg Self-Esteem Scale is the most widely used instrument  
39 for the measurement of global self-esteem (23). It was translated into French, and its high reliability  
40 and validity were confirmed with a French sample (24). Self-esteem measurement was part of the  
41 optional mental health survey (Time 2). We used a continuous score for the primary analysis.  
42  
43  
44  
45  
46  
47  
48  
49  
50

### 51 52 *Covariates*

53  
54 All the covariates were collected through the self-administered online questionnaire at cohort  
55 enrolment (Time 1), except for the psychosocial covariates which were part of the mental health sub-  
56 study (i.e. at the same time as self-esteem measurement, Time 2). They all preceded the outcome to  
57  
58  
59  
60

1  
2  
3 keep the longitudinal sequence between predictors and outcome. The covariates included in this study  
4 covered the 6 domains of potential determinants of self-rated health described in the literature (12):

5  
6  
7  
8 *Demographic covariates:* We built the following demographic variables: *sex* (male/female), *age* (in  
9 years when the outcome was measured, Time 3).

10  
11  
12  
13 *Academic covariates:* *Education level of student* was collected at cohort inclusion and categorized  
14 into: freshman, sophomore, junior and senior. For *parental education level*, we used the education  
15 level of the parents declared by the students (at least one of their parents had a higher education level  
16 than baccalaureate versus not).

17  
18  
19  
20  
21  
22 *Financial covariates:* *Self-rated economic situation during childhood* (“*Very*  
23 *difficult*”/“*Difficult*”/“*Correct*” versus “*Comfortable*”/“*Very comfortable*”) and *self-rated*  
24 *satisfaction about financial resources during college* (“*Very satisfied*”/“*Rather satisfied*” versus  
25 “*Satisfied*”/“*Rather dissatisfied*”/“*Totally unsatisfied*”).

26  
27  
28  
29  
30  
31 *Social covariates:* Students’ *living conditions* (cohabitation with parents, flatssharing/couple or alone)  
32 and *self-rated familial support during childhood* (Weak “*None at all*”/ “*A little*”/“*Moderate*” versus  
33 High “*A lot*”/“*Enormous*”).

34  
35  
36  
37  
38 *Geographical covariates:* Students included in this study were spread over the French territory. To  
39 take disparities across college campuses into account we selected the 4 most constitutive *cities of the*  
40 *registration university* in the sample (Bordeaux/Versailles/Nice/Paris/other).

41  
42  
43  
44  
45 *Behavioral covariates:* *Tobacco consumption* (none,  $\leq 10$  cigarettes/day,  $> 10$  cigarettes/day). *Binge*  
46 *drinking frequency* was defined as drinking at least 6 drinks on the same occasion (evening) (Never,  
47 Rarely if “*Once a year*”, Occasionally if “*several times a year*”/“*once a month*”, Frequently if “*once a*  
48 *week or less*”/“*2 to 3 times a week*”/“*4 to 6 times a week*”). Then students declared whether they  
49 consumed *psychoactive substances* at least once in their life, from cannabis, ecstasy, amphetamines,  
50 nitrous oxide, inhalation products and cocaine. To determine *physical activity frequency*, we combined  
51 walking times and sports by summing the count number of duration in minutes per day ( $< 25$ , between  
52  
53  
54  
55  
56  
57  
58  
59  
60

1  
2  
3 25 to 35, >35). *Body Mass Index (BMI)* (<25 vs >=25 kg/m<sup>2</sup>). Finally, good nutritional habits was  
4 based on adherence to The French National Nutrition and Health Program (PNNS) (25). Each of the  
5 seven nutrition recommendations was coded 0 if not followed and 1 if followed. The sum (7  
6 representing the highest adherence to recommendations and 0 the lowest) was computed.  
7  
8  
9

10  
11  
12 *Psychosocial covariates: Coping* was measured by the Student Coping Scale (26). Three sub-scores  
13 were computed representing social support coping, emotional coping and festive coping (a higher  
14 score represented higher coping resources). *Aggressiveness* was measured by an adaptation of the  
15 Brown-Goodwin assessment for Life History of Aggression, translated into French by Bellivier (27).  
16 Higher scores represented higher aggressiveness. *Impulsivity* was measured by an Adolescent Version  
17 of the Barratt Impulsiveness Scale-11 (BIS-11-A) translated into French by Coudrey F. and Michel G  
18 (28). Higher scores represented higher impulsivity. *Personality traits* were measured by the  
19 Temperament and Character Inventory translated into French by Pélissolo F (29,30). Six sub-scores  
20 were computed: novelty seeking, persistence, harm avoidance, determination, reward dependence and  
21 cooperativeness. Higher scores represented greater adherence to the type of personality.  
22  
23  
24  
25  
26  
27  
28  
29  
30  
31  
32  
33

34 *Objective health indicator:* participants with at least one medical diagnosis for mental or physical  
35 diseases or disability at cohort inclusion.  
36  
37  
38

### 39 **Study size**

40  
41 We performed a sample size calculation for logistic regression between self-esteem and self-rated  
42 health, alpha 0.05 and power 0.90. Based on two French studies among college students, we assumed  
43 that the distribution of self-esteem was normal (mean=28.9, standard deviation=5.7) (31,32). The  
44 proportion of participants declaring having good or very good health has been estimated in 2 studies in  
45 Sweden and Italy among college students to be 13 and 23% respectively (33,34). We assumed the  
46 odds ratio (OR) to be 1.1 based on the only two studies reported among high school students in South  
47 Korea and adults in Canada (1,15). The minimum required sample size was between 232 and 344  
48 based on self-rated health proportions (SAS software PROC POWER).  
49  
50  
51  
52  
53  
54  
55  
56  
57  
58  
59  
60

### *Statistical analysis*

First, we described the study sample. Then, in order to estimate the association between self-esteem and self-rated health, we computed a logistic regression model. We modeled the probability of declaring good or very good self-rated health during the 1st follow-up. The primary explanatory variable was self-esteem. To allow relevant interpretation, we estimated associations for the increase of one standard deviation (i.e. 5.696). All the potential confounders described above were entered in the model as covariates. In the modeling process, we first estimated univariate models. Log-linearity of the effect of self-esteem (continuous variable) was checked. We tested interactions for gender, age and cities among self-rated health and self-esteem links by univariate models and performed stratified analysis if the interaction was significant ( $p < 0.05$ ). Then we selected variables if  $p\text{-value} < 0.25$  to compute multivariate models. Finally, we performed a stepwise backward selection for a final multivariate model with a threshold of  $p\text{-value} = 0.05$ . At every step, we checked the confusion effect and computed the OR, 95% confidence interval (95%CI) and  $p$ -value ( $p$ ) of the corresponding Wald test.

Finally we conducted sensitivity analyses to test the robustness of the findings: (1) modeling self-rated health (a) in continuous variable (ranging from 1 to 5) and (b) in three categories (with an “average” modality); (2) estimating the self-esteem effect through a categorized variable (corresponding to quartiles:  $\leq 25$ ,  $]25-28]$ ,  $]28-33]$ ,  $> 33$ ) to bring to light a potential dose-response effect; (3) completing the adjustment (a) with baseline self-rated health; (b) forcing the adjustment with delays between the three measurement periods; (c) with objective health indicators; (4) performing primary modeling among the complete case population.

Our missing data analysis procedures used missing at random (MAR) assumptions. We used the MICE (multivariate imputation by chained equations) method of multiple multivariate imputation in SAS software (PROC MI and MIANALYZE) (35,36). We independently analyzed 10 copies of the data, each with suitably imputed missing values, in the multivariate logistic regression analyses. We averaged estimates of the variables to give a single mean estimate and adjusted standard errors



1  
2  
3 according to Rubin's rules. We imputed only data from covariates using self-esteem, self-rated health,  
4  
5 covariate data and completed the imputation process with other data collected in the i-share cohort  
6  
7 (alcohol consumption, walking time per day, sport practice time, stress score, anxiety score,  
8  
9 depression score and self-rated quality of sleep).  
10

11  
12 We performed all analyses using the SAS statistical software (SAS version 9.3; SAS Institute Inc,  
13  
14 Cary, NC).  
15  
16

## 17 18 19 **RESULTS**

20  
21 The total sample comprised 1011 participants. Figure 1 shows the flow chart of the study population.  
22  
23 Of the 14795 college students enrolled in the i-Share cohort, 3613 completed the mental health sub-  
24  
25 study, 1038 were eligible for this study and 1011 were ultimately analyzed. Prospective self-rated  
26  
27 health assessment (i.e. during the 1st follow-up, Time 3) was a median of 13.2 months after enrolment  
28  
29 in the cohort and a median of 8.4 months after completion of the mental health sub-study (i.e. self-  
30  
31 esteem measure, Time 2). The baseline characteristics of the study population are presented in Table 1.  
32  
33 The mean age of participants was 20.8 (Standard deviation=2.3) years, 795/1011 (79%) were female,  
34  
35 367/1011 (37%) were freshmen and most students were in Bordeaux (686/1011, 68%). 346/1011  
36  
37 (34%) participants had at least one missing data item among covariates. BMI and living situation were  
38  
39 the most frequently missing variables (15% and 12% respectively) and other missing variables  
40  
41 accounted for less than 5% of missing data. At inclusion, 18% of the students declared average or poor  
42  
43 health (183/1011). At 1st follow-up, 20% of the students declared average or poor health (203/1011).  
44  
45 Table S1 in the supplementary material compares participants in the i-Share cohort versus the study  
46  
47 sample.  
48  
49

50  
51 Table 2 presents the whole modeling process after imputation of missing data and Table 3 presents the  
52  
53 final model with crude and adjusted odds ratios. The unadjusted self-esteem effect (for the increase of  
54  
55 one standard deviation) on self-rated health was statistically significant (OR=1.70, 95%CI [1.44-1.99],  
56  
57  $p<0.0001$ ). Log-linearity of the self-esteem effect was confirmed, allowing a valid estimation. None of  
58  
59  
60

1  
2  
3 the predefined interactions (gender, cities and age) were statistically significant (all p-values >0.10).

4  
5 The final multivariate model was adjusted for BMI, financial situation during childhood and 3  
6  
7 personality traits (persistence, harm avoidance and cooperativeness). With this final model, the  
8  
9 increase of one standard deviation in self-esteem was associated with a 40% increase in the probability  
10  
11 of declaring good or very good health versus average to very poor health (adjusted OR=1.40, 95%CI  
12  
13 [1.15-1.72], p=0.001).

14  
15  
16 BMI>25 kg/m<sup>2</sup> and difficult financial situation during childhood decreased the probability of declaring  
17  
18 good to very good health by 2. Three personality traits were associated with self-rated health: low  
19  
20 persistence and harm avoidance and high cooperativeness were associated with declaring good to very  
21  
22 good health. The restraint model showed acceptable discrimination power (Area Under Curve=0.7205)  
23  
24 and the Hosmer-Lemeshow test proved model suitability to data (p-value=0.8614).

25  
26  
27 Table 4 presents sensitivity analysis results showing the robustness of findings. Whatever the  
28  
29 modeling choices for self-rated health and self-esteem or adjusting strategies, higher self-esteem was  
30  
31 persistently associated with better self-rated health. Furthermore, the model with self-esteem in four  
32  
33 categories showed a dose-response effect with graduate adjusted OR and a significant global test  
34  
35 (p<0.04).

## 36 37 38 **DISCUSSION**

### 39 40 41 **Findings of the study**

42  
43  
44 In this large longitudinal study among college students, higher self-esteem levels were independently  
45  
46 associated with better self-rated health, even after complete adjustment for known confounders. This  
47  
48 association was not modified by gender or age. Additional risk factors such as BMI, financial situation  
49  
50 during childhood and personality traits (persistence, harm avoidance and cooperativeness) were  
51  
52 associated with self-rated health. This original finding opens up an opportunity for interventional  
53  
54 research targeting psychosocial resources, especially self-esteem, in the university setting.

### 55 56 57 **Interpretation**

1  
2  
3 The association between higher levels of self-esteem and better self-rated health found in the current  
4 study corroborates previous research. This finding based on a sample of college students supports and  
5 extends previous studies on other population samples by showing the same pattern of association  
6 between self-esteem and self-rated health (15,1). Several research works and literature reviews  
7 formulate hypotheses on the potential underlying mechanisms which may explain the relationship  
8 between self-esteem and health. Good self-esteem may enable individuals to make better choices,  
9 including adopting healthy behaviors (17). High self-esteem may increase the ability to put in place  
10 appropriate strategies to cope with everyday situations, which in turn increases the capacity to feel  
11 well and more generally the capacity of resilience (37). An alternative hypothesis is based on bodily  
12 sensations (i.e. information that conveys messages from the organism to the brain). This information is  
13 available to the individual consciousness, is included in self-rating of health and may reflect important  
14 physiological dysregulation, such as inflammatory processes (38). In this hypothesis, self-esteem  
15 appears to be a psychosocial ability that allows individuals to cope better with stress and prevents or  
16 diminishes these deleterious inflammatory processes. Throughout the literature, several determinants  
17 of self-rated health have been found (12). Our study was consistent with this in finding that a low  
18 BMI, a comfortable financial situation during childhood and three personality traits were associated  
19 with good self-rated health. In contrast to the literature, we did not find gender differences for self-  
20 rated health after complete adjustment (39–41). This discordant result could be due to differences in  
21 sampling and adjustment strategies. In particular, fewer males than women participated in the i-Share  
22 cohort. Moreover, we found that self-rated health was influenced more by the family's financial  
23 difficulties during childhood than during college years.

### 24 **Strengths and limitations**

25  
26 The strengths of our study include the longitudinal design, standardized assessment tools and broad  
27 adjustment for confounders. In addition, this study investigates self-rated health among college  
28 students, a population that has received less attention in the literature. Although the study sample  
29 included only a fraction of the original I-Share cohort, the number of participants was still relatively

1  
2  
3 high compared to the available studies in the area. A set of limitations should be taken into  
4  
5 consideration, however, to interpret the findings properly. First, a sampling bias could have arisen  
6  
7 since participants were mainly healthy female students. . Since young females usually have lower  
8  
9 self-reported health than males caution should be taken regarding extrapolation of the results to males  
10  
11 (42). Further research are needed with a larger and more varied sample. Second, we used a  
12  
13 longitudinal design with a median follow-up period of 8 months, which is relevant to assess impact on  
14  
15 self-rated health in young adults. We do not have any information on the persistency of the self-  
16  
17 esteem/self-rated health relationship in the longer term, however, especially after the academic years.  
18  
19 Moreover, reverse causation between self-esteem and self-rated health may exist and could not be  
20  
21 investigated with our design. However, in sensitivity analyses, when self-rated health measurement  
22  
23 prior to self-esteem was entered in the model as a covariate, the result remained similar. Further  
24  
25 research should use repeated self-esteem and self-rated health measurements to better explore the  
26  
27 bidirectionality assumption.  
28  
29

### 30 31 **Implications**

32  
33 From a public health perspective, this study provides a contributive insight for interventional research.  
34  
35 It suggests that interventions targeting self-esteem during college years should be experimented. Yet  
36  
37 the type of intervention is still to be determined, since most of the previous interventional research on  
38  
39 self-esteem has concerned children (43,44). Consequently, further studies are needed to investigate  
40  
41 whether these interventions could be extended or transferred to college students. Self-esteem  
42  
43 improvement interventions could focus either on (1) global self-esteem by increasing self-knowledge  
44  
45 and resilience through an individual intervention, web-based for instance, or (2) a specific dimension  
46  
47 such as social self-esteem by using exercise or mentoring program (43,44). Further, the university  
48  
49 years represent a relevant period for implementing early interventions, before health behaviors and  
50  
51 mental health problems set in.  
52  
53

54  
55 From a research perspective, we have identified two priority areas. First, it appears necessary to better  
56  
57 understand the pathways between self-esteem and self-rated health by conducting mediational  
58  
59  
60

1  
2  
3 analyses. Second, the self-reported nature of the two measurements (i.e. self-esteem and self-rated  
4 health) might explain why they are linked (38). Considering that self-esteem has been reported to be  
5 linked with health outcomes other than self-rated health, we believe that there are coexisting  
6  
7 linked with health outcomes other than self-rated health, we believe that there are coexisting  
8  
9 associations with both the evaluation framework and health.  
10

## 11 12 13 14 15 **ACKNOWLEDGEMENTS**

16  
17  
18 The authors are indebted to the participants of the i-Share project for their commitment and  
19 cooperation and to the entire i-Share staff for their expert contribution and assistance.  
20  
21  
22  
23  
24

## 25 26 **FUNDING**

27  
28 The i-Share research project has received funding from the French National Research Agency (Agence  
29 Nationale de la Recherche, ANR) via the 'Investissements d'Avenir' program reference ANR-10-  
30 COHO-05. This study was further supported by a grant from the 'Health Determinants in Societies'  
31 HEADS Excellence Cluster of the University of Bordeaux, managed by the ANR, under the 'Future  
32 Investments' program in the framework of the Bordeaux 'Initiatives d'Excellence' (IdEx) program,  
33 grant number (ANR-10-IDEX-03-02).  
34  
35  
36  
37  
38  
39  
40  
41  
42  
43  
44

## 45 **CONFLICTS OF INTEREST**

46  
47  
48 None declared  
49  
50  
51  
52  
53  
54  
55  
56  
57  
58  
59  
60

## REFERENCES

1. Chun J, Nam S, Chung I-J, Kang H, Nho CR, Woo S. Factors associated with perceived health among Korean adolescents. *Soc Work Public Health*. 2014;29(6):528-39.
2. Nielsen TH. The Relationship Between Self-Rated Health and Hospital Records. *Health Economics*. 2016;25(4):497-512.
3. Sajjad A, Freak-Poli RL, Hofman A, Roza SJ, Ikram MA, Tiemeier H. Subjective measures of health and all-cause mortality - the Rotterdam Study. *Psychol Med*. 2017;47(11):1971-80.
4. Breidablik H-J, Meland E, Lydersen S. Self-rated health in adolescence: A multifactorial composite. *Scand J Public Health*. 1 janv 2008;36(1):12-20.
5. Breidablik H-J, Meland E, Lydersen S. Self-rated health during adolescence: stability and predictors of change (Young-HUNT study, Norway). *Eur J Public Health*. janv 2009;19(1):73-8.
6. Idler EL, Benyamini Y. Self-rated health and mortality: a review of twenty-seven community studies. *J Health Soc Behav*. mars 1997;38(1):21-37.
7. Ware J. The assessment of health status. In: *Applications of social science to clinical medicine and health policy*. New Brunswick, NJ: Rutgers University Press; p. 204-28.
8. de Bruin A, And Others. Health Interview Surveys: Towards International Harmonization of Methods and Instruments. WHO Regional Publications, European Series, No. 58 [Internet]. Office of Publications, WHO Regional Office for Europe, Scherfigsvej 8, DK-2100 Copenhagen 0, Denmark (39 Swiss francs).; 1996 [cité 1 août 2017]. Disponible sur: <https://eric.ed.gov/?id=ED394961>
9. Robine J-M, Jagger C. Creating a coherent set of indicators to monitor health across Europe: the Euro-REVES 2 project. *Eur J Public Health*. 1 sept 2003;13(suppl\_3):6-14.
10. DeSalvo KB, Bloser N, Reynolds K, He J, Muntner P. Mortality Prediction with a Single General Self-Rated Health Question. *Journal of General Internal Medicine*. 1 mars 2006;21(3):267-75.
11. Mossey JM, Shapiro E. Self-rated health: a predictor of mortality among the elderly. *Am J Public Health*. août 1982;72(8):800-8.
12. Mantzavinis GD, Pappas N, Dimoliatis IDK, Ioannidis JPA. Multivariate models of self-reported health often neglected essential candidate determinants and methodological issues. *J Clin Epidemiol*. mai 2005;58(5):436-43.
13. Bobak M, Pikhart H, Rose R, Hertzman C, Marmot M. Socioeconomic factors, material inequalities, and perceived control in self-rated health: cross-sectional data from seven post-communist countries. *Soc Sci Med*. nov 2000;51(9):1343-50.
14. Mackenbach JP, Simon JG, Looman CWN, Joung IMA. Self-assessed health and mortality: could psychosocial factors explain the association? *Int J Epidemiol*. déc 2002;31(6):1162-8.
15. Shields M, Shooshtari S. Determinants of self-perceived health. *Health Rep*. déc 2001;13(1):35-52.
16. Baumeister RF, Campbell JD, Krueger JI, Vohs KD. Does High Self-Esteem Cause Better Performance, Interpersonal Success, Happiness, or Healthier Lifestyles? *Psychol Sci Public Interest*. mai 2003;4(1):1-44.
17. Mann M, Hosman CMH, Schaalma HP, de Vries NK. Self-esteem in a broad-spectrum approach for mental health promotion. *Health Educ Res*. août 2004;19(4):357-72.
18. Degenhardt L, Coffey C, Carlin JB, Swift W, Moore E, Patton GC. Outcomes of occasional cannabis use in adolescence: 10-year follow-up study in Victoria, Australia. *Br J Psychiatry*. avr 2010;196(4):290-5.

19. Mota N, Alvarez-Gil R, Corral M, Rodríguez Holguín S, Parada M, Crego A, et al. Risky alcohol use and heavy episodic drinking among Spanish University students: a two-year follow-up. *Gac Sanit.* oct 2010;24(5):372-7.
20. Van De Ven MOM, Greenwood PA, Engels RCME, Olsson CA, Patton GC. Patterns of adolescent smoking and later nicotine dependence in young adults: a 10-year prospective study. *Public Health.* févr 2010;124(2):65-70.
21. Montagni I, Guichard E, Kurth T. Association of screen time with self-perceived attention problems and hyperactivity levels in French students: a cross-sectional study. *BMJ Open.* 1 févr 2016;6(2):e009089.
22. Galéra C, Salla J, Montagni I, Hanne-Poujade S, Salamon R, Grondin O, et al. Stress, attention deficit hyperactivity disorder (ADHD) symptoms and tobacco smoking: The i-Share study. *Eur Psychiatry.* sept 2017;45:221-6.
23. Blascovich J, Tomaka J. Measures of Self-Esteem. In: *Measures of Personality and Social Psychological Attitudes: Measures of Social Psychological Attitudes.* Academic Press; 2013. p. 115-23.
24. Chambon O, Cornillon-Jacoudon D, Germain M, Assouline B, Landazuri F, Marie-Cardine M. Bien-être subjectif et qualité de vie. Définitions, mesures et facteurs déterminants. Implications thérapeutiques. *Inf Psychiatr.* 1992;(Suppl 5: LVII-LXII).
25. Hercberg S, Chat-Yung S, Chauliac M. The French National Nutrition and Health Program: 2001–2006–2010. *Int J Public Health.* 1 avr 2008;53(2):68-77.
26. Boujut E, Bruchon-Schweitzer M, Dombrowski SU. Coping among Students: Development and validation of an exploratory measure. *Psychology.* août 2012;3(8):562-8.
27. Brown GL, Goodwin FK, Ballenger JC, Goyer PF, Major LF. Aggression in humans correlates with cerebrospinal fluid amine metabolites. *Psychiatry Res.* oct 1979;1(2):131-9.
28. Fossati A, Barratt ES, Acquarini E, Di Ceglie A. Psychometric Properties of an Adolescent Version of the Barratt Impulsiveness Scale-11 for a Sample of Italian High School Students. *Percept Mot Skills.* 1 oct 2002;95(2):621-35.
29. Cloninger CR, Bayon C, Svrakic DM. Measurement of temperament and character in mood disorders: a model of fundamental states as personality types. *Journal of Affective Disorders.* 1 oct 1998;51(1):21-32.
30. Pelissolo A, Mallet L, Baleyte J-M, Michel G, Cloninger CR, Allilaire J-F, et al. The Temperament and Character Inventory-Revised (TCI-R): psychometric characteristics of the French version. *Acta Psychiatrica Scandinavica.* 1 août 2005;112(2):126-33.
31. Estingoy P, Fort E, Normand J-C, Lerond J, D'Amato T. Vulnérabilités psychiques chez les étudiants : à propos de deux enquêtes en santé mentale à l'université Lyon 1. *Annales Médico-psychologiques, revue psychiatrique.* 1 juill 2013;171(6):392-8.
32. Saleh D, Camart N, Romo L. Predictors of Stress in College Students. *Front Psychol [Internet].* 2017 [cité 1 août 2017];8. Disponible sur: <http://journal.frontiersin.org/article/10.3389/fpsyg.2017.00019/full>
33. Von Bothmer MIK, Fridlund B. Self-rated health among university students in relation to sense of coherence and other personality traits. *Scandinavian Journal of Caring Sciences.* 1 déc 2003;17(4):347-57.
34. Waure C de, Soffiani V, Viridis A, Poscia A, Pietro MLD. Italian university students' self-perceived health and satisfaction of life. *Annali dell'Istituto Superiore di Sanità.* juin 2015;51(2):121-5.
35. Rubin DB, Schenker N. Multiple imputation in health-care databases: An overview and some applications. *Statist Med.* 1 avr 1991;10(4):585-98.
36. Schafer JL. *Analysis of Incomplete Multivariate Data.* CRC Press; 1997. 448 p.

- 1
- 2
- 3 37. Harter S. The construction of the self: A developmental perspective. New York, NY, US: Guilford Press; 1999. (Distinguished contributions in psychology).
- 4
- 5 38. Jylhä M. What is self-rated health and why does it predict mortality? Towards a unified
- 6 conceptual model. *Soc Sci Med*. août 2009;69(3):307-16.
- 7
- 8 39. Schmidt M. Predictors of self-rated health and lifestyle behaviours in Swedish university
- 9 students. *Glob J Health Sci*. 15 mai 2012;4(4):1-14.
- 10
- 11 40. Cullati S, Rousseaux E, Gabadinho A, Courvoisier DS, Burton-Jeangros C. Factors of change
- 12 and cumulative factors in self-rated health trajectories: a systematic review. *Adv Life Course*
- 13 *Res*. mars 2014;19:14-27.
- 14
- 15 41. El Ansari W, Stock C. Explaining the gender difference in self-rated health among university
- 16 students in Egypt. *Women Health*. oct 2016;56(7):731-44.
- 17
- 18 42. Kling KC, Hyde JS, Showers CJ, Buswell BN. Gender differences in self-esteem: A meta-
- 19 analysis. *Psychological Bulletin*. 1999;125(4):470-500.
- 20
- 21 43. King KA, Vidourek RA, Davis B, McClellan W. Increasing self-esteem and school
- 22 connectedness through a multidimensional mentoring program. *J Sch Health*. sept
- 23 2002;72(7):294-9.
- 24
- 25 44. Ekeland E, Heian F, Hagen KB, Abbott J, Nordheim L. Exercise to improve self-esteem in
- 26 children and young people. *Cochrane Database Syst Rev*. 2004;(1):CD003683.
- 27
- 28
- 29
- 30
- 31
- 32
- 33
- 34
- 35
- 36
- 37
- 38
- 39
- 40
- 41
- 42
- 43
- 44
- 45
- 46
- 47
- 48
- 49
- 50
- 51
- 52
- 53
- 54
- 55
- 56
- 57
- 58
- 59
- 60



## Tables

**Table 1.** Characteristics of the study population concerning self-rated health, self-esteem, demographic, educational, financial, social, geographical, follow up, behavioral and psychological data at Time 1: cohort enrolment, Time 2: optional mental health survey, Time 3: cohort follow-up in the i-Share Cohort, France, 2013-2016. n=1011

| Characteristics                                  | Participants<br>n=1011 |             |
|--------------------------------------------------|------------------------|-------------|
| <b>Outcome at Time 3</b>                         |                        |             |
| SRH 5-items, n (%)                               |                        |             |
| Very good                                        | 225                    | (22.3)      |
| Good                                             | 583                    | (57.7)      |
| Average                                          | 177                    | (17.5)      |
| Poor                                             | 26                     | (2.6)       |
| Very poor                                        | 0                      | (-)         |
| SRH dichotomized, n (%)                          |                        |             |
| Very good to good                                | 808                    | (79.9)      |
| Average to very poor                             | 203                    | (20.1)      |
| SRH in continuous <sup>a</sup> , median (IQR)    | 2.0                    | (2.0 ; 2.0) |
| <b>Main exposure at Time 2</b>                   |                        |             |
| Self-esteem in continuous variable, median (IQR) | 28                     | (25 ; 33)   |
| Self-esteem in categorical variable, n (%)       |                        |             |
| ≤25                                              | 287                    | (28.4)      |
| ]25-28]                                          | 219                    | (21.7)      |
| ]28-33]                                          | 277                    | (27.4)      |
| >=33                                             | 228                    | (22.6)      |
| <b>Demographic data</b>                          |                        |             |

|                                                                             |      |        |
|-----------------------------------------------------------------------------|------|--------|
| Age at Time 3, mean (STD)                                                   | 20.8 | (2.3)  |
| Female, n (%)                                                               | 795  | (78.6) |
| <b>Educational data at Time 1</b>                                           |      |        |
| University year, n (%)                                                      |      |        |
| Freshman                                                                    | 367  | (36.5) |
| Sophomore                                                                   | 218  | (21.7) |
| Junior                                                                      | 154  | (15.3) |
| Senior                                                                      | 267  | (26.5) |
| At least one parent with high education level, n (%)                        | 274  | (28.5) |
| <b>Financial data at Time 1</b>                                             |      |        |
| Comfortable to very comfortable financial situation during childhood, n (%) | 573  | (56.7) |
| Rather satisfied to very satisfied with financial resources, n (%)          | 504  | (49.8) |
| <b>Social data at Time 1</b>                                                |      |        |
| Cohabitation, n (%)                                                         |      |        |
| With parents                                                                | 278  | (31.3) |
| Flatsharing or couple                                                       | 287  | (32.4) |
| No cohabitation / alone                                                     | 322  | (36.3) |
| Strong familial support during childhood, n (%)                             | 730  | (72.9) |
| <b>Geographical and follow-up data</b>                                      |      |        |
| City of the registration university at Time 1, n (%)                        |      |        |
| Bordeaux                                                                    | 686  | (67.9) |
| Versailles                                                                  | 77   | (7.6)  |
| Nice                                                                        | 22   | (2.2)  |
| Paris                                                                       | 45   | (4.5)  |
| Other                                                                       | 181  | (17.9) |

|                                                                                                  |      |               |
|--------------------------------------------------------------------------------------------------|------|---------------|
| Delay in months between inclusion and SRH assessment (follow-up),<br>median (IQR)                | 13.2 | (12.3 ; 23.4) |
| Delay in months between mental health assessment and SRH assessment<br>(follow-up), median (IQR) | 8.4  | (3.2 ; 12.0)  |

### Behavioral data at Time 1

#### Tobacco consumption, n (%)

|                 |     |        |
|-----------------|-----|--------|
| None            | 761 | (75.3) |
| <=10 cigarettes | 213 | (21.1) |
| >10 cigarettes  | 37  | (3.66) |

#### Alcohol consumption frequency during evening, n (%)

|              |     |        |
|--------------|-----|--------|
| Never        | 22  | (2.3)  |
| Rarely       | 225 | (23.2) |
| Occasionally | 393 | (40.5) |
| Frequently   | 330 | (34.0) |

Psychoactive substance consumption at least once in life, n (%) 603 (59.6)

BMI <25 Kg/m<sup>2</sup> at Time 1, n (%) 909 (89.9)

Compliance with French nutritional recommendations, median (IQR) 3 (3 ; 4)

#### Physical activity, n (%)

|                           |     |        |
|---------------------------|-----|--------|
| Less than 25 min/day      | 109 | (10.9) |
| Between 25 and 35 min/day | 183 | (18.3) |
| More than 35 min/day      | 706 | (70.7) |

### Psychological data at Time 2, median (IQR)

|                            |    |           |
|----------------------------|----|-----------|
| Coping - Social support    | 11 | (8 ; 14)  |
| Coping - Emotional         | 20 | (17 ; 22) |
| Coping - Festive-addictive | 11 | (9 ; 14)  |
| Impulsivity                | 61 | (56 ; 67) |

|    |                                 |      |           |
|----|---------------------------------|------|-----------|
| 1  |                                 |      |           |
| 2  |                                 |      |           |
| 3  | Aggressiveness                  | 1    | (0 ; 3)   |
| 4  |                                 |      |           |
| 5  | Personality - Novelty seeking   | 20.5 | (18 ; 23) |
| 6  |                                 |      |           |
| 7  | Personality - Persistence       | 28   | (24 ; 31) |
| 8  |                                 |      |           |
| 9  | Personality - Harm avoidance    | 27   | (22 ; 31) |
| 10 |                                 |      |           |
| 11 | Personality - Determination     | 27   | (23 ; 31) |
| 12 |                                 |      |           |
| 13 | Personality - Reward dependence | 28   | (23 ; 32) |
| 14 |                                 |      |           |
| 15 | Personality - Cooperativeness   | 32   | (29 ; 35) |
| 16 |                                 |      |           |

---

*n: number of participants; IQR: Interquartile Range; BMI: Body Mass Index; SRH: self-rated*

*health*

*<sup>a</sup> 1=Very good, 2=Good, 3=Average, 4=Poor, 5=Very poor*

**Table 2.** Univariate and multivariate logistic model of probability to declare good or very good compared to very poor, poor or average self-rated health after imputation of missing data on covariates. The i-Share Cohort, France, 2013-2016. n=1011

|                                                                       | Univariate model |                | Multivariate model |                |
|-----------------------------------------------------------------------|------------------|----------------|--------------------|----------------|
|                                                                       | OR               | 95%CI          | aOR                | 95%CI          |
| <b>MAIN EXPOSURE</b>                                                  |                  |                |                    |                |
| Self-esteem (for an increase of one standard deviation <sup>b</sup> ) | 1.70             | 1.44 ; 1.99*** | 1.40               | 1.15 ; 1.72*** |
| <b>COVARIATES</b>                                                     |                  |                |                    |                |
| <b>Demographic data</b>                                               |                  |                |                    |                |
| Gender                                                                |                  |                |                    |                |
| Male                                                                  | 1                | -              |                    |                |
| Female                                                                | 0.48             | 0.31 ; 0.74*** |                    |                |
| Age at self-rated health assessment (follow-up)                       | 0.98             | 0.92 ; 1.04    |                    |                |
| <b>Educational data</b>                                               |                  |                |                    |                |
| University year at inclusion                                          |                  |                |                    |                |
| 1 <sup>st</sup> year / freshman                                       | 1                | -              |                    |                |
| 2 <sup>nd</sup> year / sophomore                                      | 1.54             | 1.00 ; 2.37    |                    |                |
| 3 <sup>rd</sup> year / junior                                         | 1.60             | 0.98 ; 2.62    |                    |                |
| 4 <sup>th</sup> year or more / senior                                 | 1.22             | 0.83 ; 1.80    |                    |                |
| Parents' education level                                              |                  |                |                    |                |
| At least one with high level                                          | 1                | -              |                    |                |
| Both with low level or only one given with low level                  | 0.86             | 0.60 ; 1.22    |                    |                |
| <b>Financial data</b>                                                 |                  |                |                    |                |
| Financial situation during childhood                                  |                  |                |                    |                |

|                                                    |      |                |      |                |
|----------------------------------------------------|------|----------------|------|----------------|
| Comfortable to very comfortable                    | 1    | -              | 1    | -              |
| Correct to very difficult                          | 0.48 | 0.36 ; 0.66*** | 0.54 | 0.39 ; 0.74*** |
| Satisfaction with financial resources at inclusion |      |                |      |                |
| Rather satisfied to very satisfied                 | 1    | -              |      |                |
| Completely dissatisfied to satisfied               | 0.55 | 0.40 ; 0.75*** |      |                |

---

### Social data

---

#### Cohabitation at inclusion

|                        |      |             |  |  |
|------------------------|------|-------------|--|--|
| No cohabitation        | 1    | -           |  |  |
| With parents           | 1.03 | 0.70 ; 1.51 |  |  |
| Flat sharing or couple | 1.12 | 0.76 ; 1.64 |  |  |

#### Familial support during childhood

|        |      |                |  |  |
|--------|------|----------------|--|--|
| Strong | 1    | -              |  |  |
| Weak   | 0.56 | 0.40 ; 0.78*** |  |  |

---

### Geographical and follow-up data

---

#### City of the registration university

|            |      |             |  |  |
|------------|------|-------------|--|--|
| Bordeaux   | 1    | -           |  |  |
| Versailles | 1.16 | 0.63 ; 2.14 |  |  |
| Nice       | 1.16 | 0.39 ; 3.49 |  |  |
| Paris      | 1.04 | 0.49 ; 2.20 |  |  |
| Other      | 1.08 | 0.71 ; 1.63 |  |  |

#### Delay in months between inclusion and self-rated

##### health assessment (follow-up)

|      |             |
|------|-------------|
| 1.00 | 0.97 ; 1.03 |
|------|-------------|

#### Delay in months between mental health assessment

##### and self-rated health assessment (follow-up)

|      |             |
|------|-------------|
| 1.00 | 0.98 ; 1.02 |
|------|-------------|

---

### Behavioral data

---

#### Tobacco consumption at inclusion

|                                                           |      |                |      |                |
|-----------------------------------------------------------|------|----------------|------|----------------|
| None                                                      | 1    | -              |      |                |
| <=10 cigarettes                                           | 0.97 | 0.66 ; 1.42    |      |                |
| >10 cigarettes                                            | 0.66 | 0.31 ; 1.40    |      |                |
| Alcohol consumption frequency during evening at inclusion |      | **             |      |                |
| Never drink                                               | 1    | -              |      |                |
| Never binge                                               | 1.09 | 0.41 ; 2.91    |      |                |
| Occasionally binge                                        | 1.53 | 0.58 ; 4.05    |      |                |
| Frequently binge                                          | 1.99 | 0.75 ; 5.33    |      |                |
| Psychoactive substance consumption                        |      |                |      |                |
| Never                                                     | 1    | -              |      |                |
| Once in life                                              | 1.26 | 0.92 ; 1.72*   |      |                |
| BMI at inclusion                                          |      |                |      |                |
| <25 kg/m <sup>2</sup>                                     | 1    | -              | 1    | -              |
| >=25                                                      | 0.52 | 0.33 ; 0.81*** | 0.50 | 0.31 ; 0.80*** |
| Compliance with French nutritional recommendations        | 0.97 | 0.85 ; 1.10    |      |                |
| Physical activity                                         |      |                |      |                |
| More than 35 min/day                                      | 1    | -              |      |                |
| Less than 25 min/day                                      | 0.89 | 0.54 ; 1.44    |      |                |
| Between 25 and 35 min/day                                 | 1.01 | 0.67 ; 1.52    |      |                |
| <b>Psychological data</b>                                 |      |                |      |                |
| Coping                                                    |      |                |      |                |
| Social support                                            | 1.03 | 0.99 ; 1.08*   |      |                |
| Emotional                                                 | 0.93 | 0.90 ; 0.97*** |      |                |
| Festive-addictive                                         | 1.04 | 1.00 ; 1.09*   |      |                |
| Impulsivity                                               | 0.99 | 0.97 ; 1.01*   |      |                |

|    |                   |      |                |      |                |
|----|-------------------|------|----------------|------|----------------|
| 1  |                   |      |                |      |                |
| 2  |                   |      |                |      |                |
| 3  | Agressiveness     | 0.95 | 0.90 ; 1.00**  |      |                |
| 4  |                   |      |                |      |                |
| 5  | Personality       |      |                |      |                |
| 6  |                   |      |                |      |                |
| 7  | Novelty seeking   | 1.02 | 1.00 ; 1.06*   |      |                |
| 8  |                   |      |                |      |                |
| 9  | Persistence       | 0.95 | 0.92 ; 0.97*** | 0.94 | 0.91 ; 0.97*** |
| 10 |                   |      |                |      |                |
| 11 | Harm avoidance    | 0.91 | 0.89 ; 0.94*** | 0.95 | 0.92 ; 0.98*** |
| 12 |                   |      |                |      |                |
| 13 | Determination     | 1.07 | 1.04 ; 1.10*** |      |                |
| 14 |                   |      |                |      |                |
| 15 | Reward dependence | 1.03 | 1.01 ; 1.06**  |      |                |
| 16 |                   |      |                |      |                |
| 17 | Cooperativeness   | 1.04 | 1.01 ; 1.08*** | 1.04 | 1.01 ; 1.08**  |
| 18 |                   |      |                |      |                |
| 19 |                   |      |                |      |                |

---

*n*: number of participants; *IQR*: Interquartile Range; *BMI*: Body Mass Index; *OR*: Odds Ratio;

*95%CI*: 95% Confidence Interval

<sup>a</sup> Self-rated health description provided before data-imputation

<sup>b</sup> Self-esteem standard deviation: 5.696

\*p-value<0.25; \*\*p-value<0.05; \*\*\*p-value<0.01



**Table 3.** Final logistic model of probability to declare good or very good compared to very poor, poor or average self-rated health after imputation of missing data on covariates. The i-Share Cohort, France, 2013-2016. n=1011

|                                                                                      | Self-rated health <sup>a</sup> |                          | Multivariate model |                |
|--------------------------------------------------------------------------------------|--------------------------------|--------------------------|--------------------|----------------|
|                                                                                      | Good / very good,<br>n=808     | Average / poor,<br>n=203 | aOR                | 95%CI          |
| Self-esteem (for the increase of one standard deviation <sup>b</sup> ), median (IQR) | 29 (26-33)                     | 26 (22-30)               | 1.40               | 1.15 ; 1.72*** |
| BMI at inclusion, n(%)                                                               |                                |                          |                    |                |
| <25 kg/m <sup>2</sup>                                                                | 623 (89.6)                     | 130 (81.3)               | 2.11               | 1.26 ; 3.53*** |
| >=25                                                                                 | 72 (10.4)                      | 30 (18.8)                | 1                  | -              |
| Financial situation during childhood, n(%)                                           |                                |                          |                    |                |
| Comfortable to very comfortable                                                      | 487 (60.3)                     | 86 (42.4)                | 1.87               | 1.35 ; 2.59*** |
| Correct to very difficult                                                            | 321 (39.7)                     | 117 (57.6)               | 1                  | -              |
| Personality, median (IQR)                                                            |                                |                          |                    |                |
| Persistence                                                                          | 29 (24-31)                     | 29 (25-33)               | 0.94               | 0.91 ; 0.97*** |
| Harm avoidance                                                                       | 26 (22-30)                     | 29 (25-33)               | 0.95               | 0.92 ; 0.98*** |
| Cooperativeness                                                                      | 32 (29-35)                     | 32 (28-35)               | 1.04               | 1.01 ; 1.08**  |

*n*: number of participants; *IQR*: Interquartile Range; *BMI*: Body Mass Index; *OR*: Odds Ratio;

*95%CI*: 95% Confidence Interval

<sup>a</sup> Self-rated health description provided before data-imputation

<sup>b</sup> Self-esteem standard deviation: 5.696

\*p-value<0.25; \*\*p-value<0.05; \*\*\*p-value<0.01

**Table 4.** Sensitivity analysis of the effect of self-esteem on self-rated health. The i-Share Cohort, France, 2013-2016. n=1011

|                                                                               | Estimation <sup>a</sup> of increase of one standard deviation <sup>b</sup><br>for (1), (3) and (4) and natural scale for (2) of self-esteem effect on self-rated health |
|-------------------------------------------------------------------------------|-------------------------------------------------------------------------------------------------------------------------------------------------------------------------|
| <b>(1) modeling self-rated health</b>                                         |                                                                                                                                                                         |
| (a) in continuous variable (ranging from 1 to 5) <sup>c</sup>                 | $\beta=-0.05$ p=0.0005                                                                                                                                                  |
| (b) in three categories (with a “average” modality)                           |                                                                                                                                                                         |
| Average versus Poor/very poor                                                 | OR=1.69 p =0.0429                                                                                                                                                       |
| Good/very good versus Poor/very poor                                          | OR=2.23 p =0.0015                                                                                                                                                       |
| <b>(2) estimating self-esteem effect throughout a categorized variable</b>    |                                                                                                                                                                         |
| ]25-28] vs $\leq 25$                                                          | OR=1.25 p=0.3032                                                                                                                                                        |
| ]28-33] vs $\leq 25$                                                          | OR=2.28 p=0.0009                                                                                                                                                        |
| >33 vs $\leq 25$                                                              | OR=1.85 p=0.0301                                                                                                                                                        |
| <b>(3) completing adjustment</b>                                              |                                                                                                                                                                         |
| (a) with baseline self-rated health                                           | OR=1.29 p=0.0160                                                                                                                                                        |
| (b) forcing the adjustment with delays between the three measurement periods  | OR=1.40 p=0.0009                                                                                                                                                        |
| (c) with objective health indicator                                           | OR=1.40 p=0.0011                                                                                                                                                        |
| <b>(4) performing primary modeling among complete case population (n=665)</b> | OR=1.55 p=0.0009                                                                                                                                                        |

OR: Odds Ratio; p: p-value

<sup>a</sup> Models adjusted for Body Mass Index, financial situation during childhood, personality scores (persistence, harm avoidance, cooperativeness)

<sup>b</sup> Self-esteem standard deviation: 5.696

<sup>c</sup> High score represent better self-rated health

## Figures

**Figure 1.** Flow diagram showing participant flow through the study based on the i-Share Cohort, France, 2013-2016.

## Supplementary material

**Figure S1.** Timeline of data collection in I-Share

**Table S1.** Comparison of characteristics between the i-share population and the study sample. The i-Share Cohort, France, 2013-2016.

For peer review only



Figure 1. Flow diagram showing participant flow through the study based on the i-Share Cohort, France, 2013-2016.

187x134mm (96 x 96 DPI)

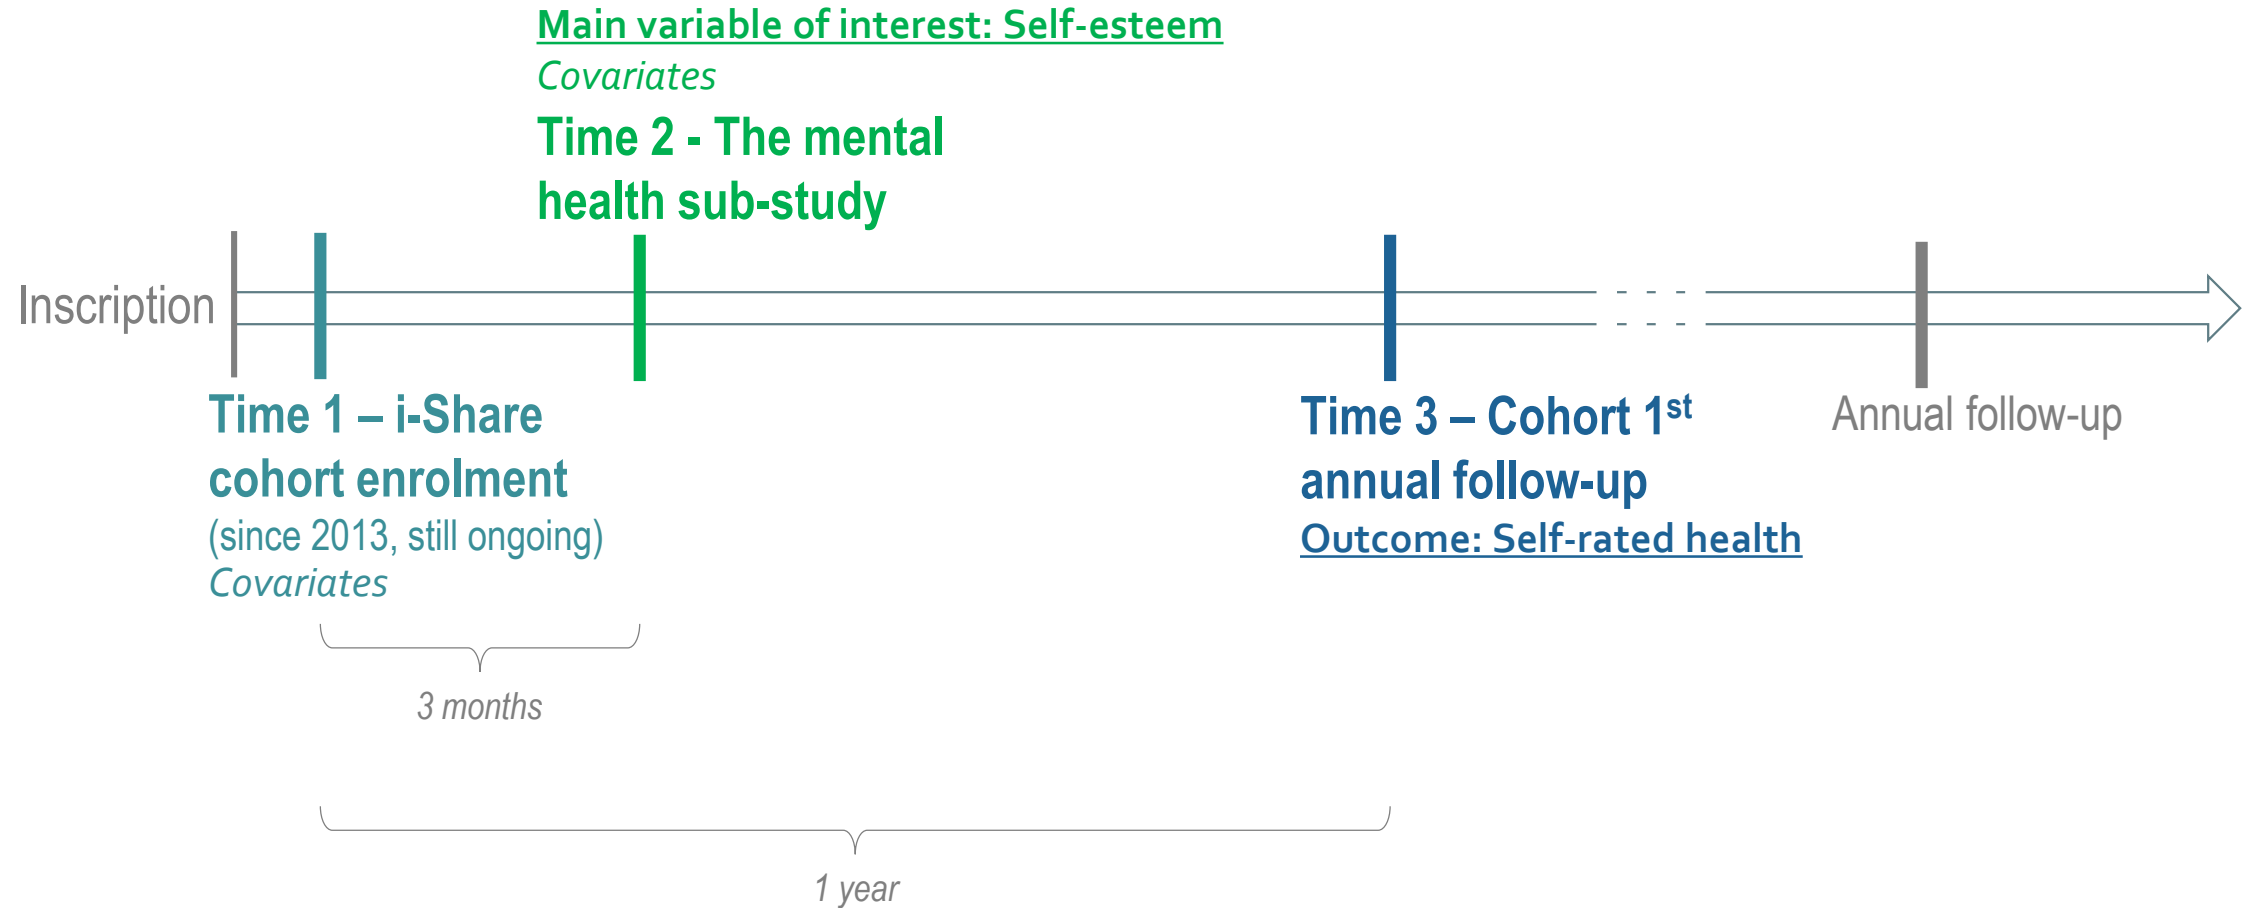

1  
2  
3  
4  
5  
6  
7  
8  
9  
10  
11  
12  
13  
14  
15  
16  
17  
18  
19  
20  
21  
22  
23  
24  
25  
26  
27  
28  
29  
30  
31  
32  
33  
34  
35  
36  
37  
38  
39  
40  
41

**Table S1.** Comparison of characteristics between the i-share population and the study sample. The i-Share Cohort, France, 2013-2016.

|                                                    | <b>i-Share population (&lt; 30 years)and without missing data on self-rated health<br/>n=11 925</b> |                 | <b>Study sample<br/>n=1 011</b> |                 |
|----------------------------------------------------|-----------------------------------------------------------------------------------------------------|-----------------|---------------------------------|-----------------|
| <b>Baseline self-rated health, n (%)</b>           |                                                                                                     |                 |                                 |                 |
| Very good                                          | 2596                                                                                                | (21.77)         | (226)                           | (22.35)         |
| Good                                               | 6810                                                                                                | (57.11)         | (602)                           | (59.55)         |
| Medium                                             | 2183                                                                                                | (18.31)         | (158)                           | (15.63)         |
| Bad                                                | 302                                                                                                 | (2.53)          | (22)                            | (2.18)          |
| Very bad                                           | 34                                                                                                  | (0.29)          | (3)                             | (0.30)          |
| <b>Sex, n (%)</b>                                  |                                                                                                     |                 |                                 |                 |
| Male                                               | 3036                                                                                                | (25.46)         | (216)                           | (21.36)         |
| Female                                             | 8889                                                                                                | (74.54)         | (795)                           | (78.64)         |
| <b>Familial support, n (%)</b>                     |                                                                                                     |                 |                                 |                 |
| DM                                                 | 212                                                                                                 |                 | (9)                             |                 |
| Low                                                | 3322                                                                                                | (28.36)         | (272)                           | (27.15)         |
| High                                               | 8391                                                                                                | (71.64)         | (730)                           | (72.85)         |
| <b>Financial situation during childhood, n (%)</b> |                                                                                                     |                 |                                 |                 |
| Comfortable to very comfortable                    | 6369                                                                                                | (53.41)         | (573)                           | (56.68)         |
| Correct to very difficult                          | 5556                                                                                                | (46.59)         | (438)                           | (43.32)         |
| <b>BMI, median (Q1 ; Q3)</b>                       | 21.39                                                                                               | (19.84 ; 23.44) | 21.33                           | (19.88 ; 23.15) |

**STROBE 2007 (v4) checklist of items to be included in reports of observational studies in epidemiology\***  
**Checklist for cohort, case-control, and cross-sectional studies (combined)**

| Section/Topic             | Item # | Recommendation                                                                                                                                                                                                                                                                                                                                                                                                                                                         | Reported on page # |
|---------------------------|--------|------------------------------------------------------------------------------------------------------------------------------------------------------------------------------------------------------------------------------------------------------------------------------------------------------------------------------------------------------------------------------------------------------------------------------------------------------------------------|--------------------|
| Title and abstract        | 1      | (a) Indicate the study's design with a commonly used term in the title or the abstract                                                                                                                                                                                                                                                                                                                                                                                 | 1,3                |
|                           |        | (b) Provide in the abstract an informative and balanced summary of what was done and what was found                                                                                                                                                                                                                                                                                                                                                                    | 3                  |
| <b>Introduction</b>       |        |                                                                                                                                                                                                                                                                                                                                                                                                                                                                        |                    |
| Background/rationale      | 2      | Explain the scientific background and rationale for the investigation being reported                                                                                                                                                                                                                                                                                                                                                                                   | 5,6                |
| Objectives                | 3      | State specific objectives, including any pre-specified hypotheses                                                                                                                                                                                                                                                                                                                                                                                                      | 6                  |
| <b>Methods</b>            |        |                                                                                                                                                                                                                                                                                                                                                                                                                                                                        |                    |
| Study design              | 4      | Present key elements of study design early in the paper                                                                                                                                                                                                                                                                                                                                                                                                                | 7                  |
| Setting                   | 5      | Describe the setting, locations, and relevant dates, including periods of recruitment, exposure, follow-up, and data collection                                                                                                                                                                                                                                                                                                                                        | 6,7                |
| Participants              | 6      | (a) <i>Cohort study</i> —Give the eligibility criteria, and the sources and methods of selection of participants. Describe methods of follow-up<br><i>Case-control study</i> —Give the eligibility criteria, and the sources and methods of case ascertainment and control selection. Give the rationale for the choice of cases and controls<br><i>Cross-sectional study</i> —Give the eligibility criteria, and the sources and methods of selection of participants | 6,7                |
|                           |        | (b) <i>Cohort study</i> —For matched studies, give matching criteria and number of exposed and unexposed<br><i>Case-control study</i> —For matched studies, give matching criteria and the number of controls per case                                                                                                                                                                                                                                                 | NA                 |
| Variables                 | 7      | Clearly define all outcomes, exposures, predictors, potential confounders, and effect modifiers. Give diagnostic criteria, if applicable                                                                                                                                                                                                                                                                                                                               | 7,8,9,10           |
| Data sources/ measurement | 8*     | For each variable of interest, give sources of data and details of methods of assessment (measurement). Describe comparability of assessment methods if there is more than one group                                                                                                                                                                                                                                                                                   | 7,8,9,10           |
| Bias                      | 9      | Describe any efforts to address potential sources of bias                                                                                                                                                                                                                                                                                                                                                                                                              | 8,10,11            |
| Study size                | 10     | Explain how the study size was arrived at                                                                                                                                                                                                                                                                                                                                                                                                                              | 10                 |
| Quantitative variables    | 11     | Explain how quantitative variables were handled in the analyses. If applicable, describe which groupings were chosen and why                                                                                                                                                                                                                                                                                                                                           | 7,8,9,10           |
| Statistical methods       | 12     | (a) Describe all statistical methods, including those used to control for confounding                                                                                                                                                                                                                                                                                                                                                                                  | 10,11              |
|                           |        | (b) Describe any methods used to examine subgroups and interactions                                                                                                                                                                                                                                                                                                                                                                                                    | 10,11              |
|                           |        | (c) Explain how missing data were addressed                                                                                                                                                                                                                                                                                                                                                                                                                            | 11                 |
|                           |        | (d) <i>Cohort study</i> —If applicable, explain how loss to follow-up was addressed<br><i>Case-control study</i> —If applicable, explain how matching of cases and controls was addressed<br><i>Cross-sectional study</i> —If applicable, describe analytical methods taking account of sampling strategy                                                                                                                                                              | 14                 |
|                           |        | (e) Describe any sensitivity analyses                                                                                                                                                                                                                                                                                                                                                                                                                                  | 11                 |
| <b>Results</b>            |        |                                                                                                                                                                                                                                                                                                                                                                                                                                                                        |                    |
| Participants              | 13*    | (a) Report numbers of individuals at each stage of study—eg numbers potentially eligible, examined for eligibility, confirmed eligible, included in the study, completing follow-up, and analysed                                                                                                                                                                                                                                                                      | 11,12              |
|                           |        | (b) Give reasons for non-participation at each stage                                                                                                                                                                                                                                                                                                                                                                                                                   | Figure 1           |

|                          |     |                                                                                                                                                                                                              |                             |
|--------------------------|-----|--------------------------------------------------------------------------------------------------------------------------------------------------------------------------------------------------------------|-----------------------------|
|                          |     | (c) Consider use of a flow diagram                                                                                                                                                                           | Figure 1                    |
| Descriptive data         | 14* | (a) Give characteristics of study participants (eg demographic, clinical, social) and information on exposures and potential confounders                                                                     | 12 + Table 1 + Table 1 supp |
|                          |     | (b) Indicate number of participants with missing data for each variable of interest                                                                                                                          | 12                          |
|                          |     | (c) <i>Cohort study</i> —Summarise follow-up time (eg, average and total amount)                                                                                                                             | 12                          |
| Outcome data             | 15* | <i>Cohort study</i> —Report numbers of outcome events or summary measures over time                                                                                                                          | 12 + Table 1                |
|                          |     | <i>Case-control study</i> —Report numbers in each exposure category, or summary measures of exposure                                                                                                         |                             |
|                          |     | <i>Cross-sectional study</i> —Report numbers of outcome events or summary measures                                                                                                                           |                             |
| Main results             | 16  | (a) Give unadjusted estimates and, if applicable, confounder-adjusted estimates and their precision (eg, 95% confidence interval). Make clear which confounders were adjusted for and why they were included | 12 + Table 2                |
|                          |     | (b) Report category boundaries when continuous variables were categorized                                                                                                                                    |                             |
|                          |     | (c) If relevant, consider translating estimates of relative risk into absolute risk for a meaningful time period                                                                                             |                             |
| Other analyses           | 17  | Report other analyses done—eg analyses of subgroups and interactions, and sensitivity analyses                                                                                                               | 13 + Table 3                |
| <b>Discussion</b>        |     |                                                                                                                                                                                                              |                             |
| Key results              | 18  | Summarise key results with reference to study objectives                                                                                                                                                     | 13                          |
| Limitations              | 19  | Discuss limitations of the study, taking into account sources of potential bias or imprecision. Discuss both direction and magnitude of any potential bias                                                   | 14                          |
| Interpretation           | 20  | Give a cautious overall interpretation of results considering objectives, limitations, multiplicity of analyses, results from similar studies, and other relevant evidence                                   | 13,14                       |
| Generalisability         | 21  | Discuss the generalisability (external validity) of the study results                                                                                                                                        | 15                          |
| <b>Other information</b> |     |                                                                                                                                                                                                              |                             |
| Funding                  | 22  | Give the source of funding and the role of the funders for the present study and, if applicable, for the original study on which the present article is based                                                | 16                          |

\*Give information separately for cases and controls in case-control studies and, if applicable, for exposed and unexposed groups in cohort and cross-sectional studies.

**Note:** An Explanation and Elaboration article discusses each checklist item and gives methodological background and published examples of transparent reporting. The STROBE checklist is best used in conjunction with this article (freely available on the Web sites of PLoS Medicine at <http://www.plosmedicine.org/>, Annals of Internal Medicine at <http://www.annals.org/>, and Epidemiology at <http://www.epidem.com/>). Information on the STROBE Initiative is available at [www.strobe-statement.org](http://www.strobe-statement.org).
